# Supplementary material for: Assessment of Antimicrobial Consumption in Multi-Field Hospitals with Pediatric Inpatients: Conventional vs. Novel Pediatric-Adjusted Methodologies
Source: MDPI journal article supplement (doi:10.3390/antibiotics12071162), 2023-07-07
Supplement: s1 [file s1]

## SUPPLEMENTARY MATERIALS

### Table of Contents

|                                                                                                                                                                                                                     |    |
|---------------------------------------------------------------------------------------------------------------------------------------------------------------------------------------------------------------------|----|
| Supplementary Table S1. Calculated cDDD of AMs for children aged 1 month to 12 years .....                                                                                                                          | 2  |
| Supplementary Table S2. Calculated weight values for children aged 1 month - 12 years .....                                                                                                                         | 7  |
| Supplementary Table S3. Calculated body surface area values for children aged 1 month - 12 years .....                                                                                                              | 7  |
| Supplementary Table S4. AMs consumption assessment by means of the proposed methodology vs the conventional ATC/DDD methodology in a three multi-field hospitals (combined data) .....                              | 8  |
| Supplementary Table S5. Differences between AMs' consumption levels calculated by means of novel pediatric-adjusted methodology vs conventional ATC/DDD methodology for a whole set of AMs (base case) .....        | 10 |
| Supplementary Table S6. Differences between AMs' consumption levels calculated by means of novel pediatric-adjusted methodology vs conventional ATC/DDD methodology for a whole set of AMs (alternative case) ..... | 12 |
| Supplementary Table S7. Differences between AMs' consumption levels calculated by means of novel pediatric-adjusted methodology vs conventional ATC/DDD methodology for aminoglycosides (base case) .....           | 14 |
| Supplementary Table S8. Differences between AMs' consumption levels calculated by means of novel pediatric-adjusted methodology vs conventional ATC/DDD methodology for penicillins (base case) .....               | 16 |
| Supplementary Table S9. Differences between AMs' consumption levels calculated by means of novel pediatric-adjusted methodology vs conventional ATC/DDD methodology for cephalosporins (base case) .....            | 18 |
| Supplementary Table S10. Differences between AMs' consumption levels calculated by means of novel pediatric-adjusted methodology vs conventional ATC/DDD methodology for carbapenems (base case) .....              | 20 |
| Supplementary Table S11. Differences between AMs' consumption levels calculated by means of novel pediatric-adjusted methodology vs conventional ATC/DDD methodology for fluoroquinolones (base case) .....         | 22 |
| Supplementary Table S12. Differences between AMs' consumption levels calculated by means of novel pediatric-adjusted methodology vs conventional ATC/DDD methodology for macrolides (base case) .....               | 24 |
| Supplementary Table S13. Differences between AMs' consumption levels calculated by means of novel pediatric-adjusted methodology vs conventional ATC/DDD methodology for lincosamides (base case) .....             | 26 |
| Supplementary Table S14. Differences between AMs' consumption levels calculated by means of novel pediatric-adjusted methodology vs conventional ATC/DDD methodology for glycopeptides (base case) .....            | 28 |
| Supplementary Table S15. Differences between AMs' consumption levels calculated by means of novel pediatric-adjusted methodology vs conventional ATC/DDD methodology for co-trimoxazole (base case) .....           | 30 |
| Supplementary Table S16. Differences between AMs' consumption levels calculated by means of novel pediatric-adjusted methodology vs conventional ATC/DDD methodology for nitroimidazoles (base case) .....          | 32 |
| Supplementary Table S17. Differences between AMs' consumption levels calculated by means of novel pediatric-adjusted methodology vs conventional ATC/DDD methodology for fosfomycin (base case) .....               | 34 |
| Supplementary Table S18. Differences between AMs' consumption levels calculated by means of novel pediatric-adjusted methodology vs conventional ATC/DDD methodology for antifungals (base case) .....              | 36 |
| Supplementary Table S19. Differences between AMs' consumption levels calculated by means of novel pediatric-adjusted methodology vs conventional ATC/DDD methodology for antivirals (base case) .....               | 38 |
| Supplementary Table S20. Doses and dosing approaches from the national summaries of product characteristics used to calculate cDDD of AMs for children aged 1 month to 12 years .....                               | 40 |
| Reference .....                                                                                                                                                                                                     | 44 |

**Supplementary Table S1.** Calculated cDDDs of AMs for children aged 1 month to 12 years, g

| INN                                      | Adm.R* | ATC code | 1-11 months | 1 year | 2 years | 3 years | 4 years | 5 years | 6 years | 7 years | 8 years | 9 years | 10 years | 11 years | 12 years | Adult DDD [1] |
|------------------------------------------|--------|----------|-------------|--------|---------|---------|---------|---------|---------|---------|---------|---------|----------|----------|----------|---------------|
| Azithromycin                             | O      | J01FA10  | 0.073       | 0.093  | 0.119   | 0.141   | 0.162   | 0.183   | 0.204   | 0.227   | 0.252   | 0.282   | 0.300    | 0.300    | 0.300    | 0.3           |
| Azithromycin                             | P      | J01FA10  | 0           | 0      | 0       | 0       | 0       | 0       | 0       | 0       | 0       | 0       | 0        | 0        | 0        | 0.5           |
| Aztreonam                                | P      | J01DF01  | 0.876       | 1.116  | 1.428   | 1.692   | 1.944   | 2.196   | 2.448   | 2.724   | 3.024   | 3.384   | 3.792    | 4.000    | 4.000    | 4             |
| Amikacin                                 | P      | J01GB06  | 0.146       | 0.186  | 0.238   | 0.282   | 0.324   | 0.366   | 0.408   | 0.454   | 0.504   | 0.564   | 0.632    | 0.692    | 0.801    | 1             |
| Amoxicillin                              | O      | J01CA04  | 0.438       | 0.558  | 0.714   | 0.846   | 0.972   | 1.098   | 1.224   | 1.362   | 1.500   | 1.500   | 1.500    | 1.500    | 1.500    | 1.5           |
| Amoxicillin and beta-lactamase inhibitor | O      | J01CR02  | 0.438       | 0.558  | 0.714   | 0.846   | 0.972   | 1.098   | 1.224   | 1.362   | 1.500   | 1.500   | 1.500    | 1.500    | 1.500    | 1.5           |
| Amoxicillin and beta-lactamase inhibitor | P      | J01CR02  | 0.730       | 0.930  | 1.190   | 1.410   | 1.620   | 1.830   | 2.040   | 2.270   | 2.520   | 2.820   | 3.000    | 3.000    | 3.000    | 3             |
| Ampicillin                               | P      | J01CA01  | 1.460       | 1.860  | 2.380   | 2.820   | 3.240   | 3.660   | 4.080   | 4.540   | 5.040   | 5.640   | 6.000    | 6.000    | 6.000    | 6             |
| Ampicillin and beta-lactamase inhibitor  | P      | J01CR01  | 1.460       | 1.860  | 2.380   | 2.820   | 3.240   | 3.660   | 4.080   | 4.540   | 5.040   | 5.640   | 6.000    | 6.000    | 6.000    | 6             |
| Amphotericin B                           | P      | J02AA01  | 0.011       | 0.014  | 0.018   | 0.021   | 0.024   | 0.027   | 0.031   | 0.034   | 0.035   | 0.035   | 0.035    | 0.035    | 0.035    | 0.035         |
| Anidulafungin                            | P      | J02AX06  | 0.011       | 0.014  | 0.018   | 0.021   | 0.024   | 0.027   | 0.031   | 0.034   | 0.038   | 0.042   | 0.047    | 0.053    | 0.060    | 0.1           |
| Acyclovir                                | O      | J05AB01  | 0           | 0      | 0       | 1.128   | 1.296   | 1.464   | 1.632   | 1.816   | 2.016   | 2.256   | 2.528    | 2.831    | 3.202    | 4             |
| Acyclovir                                | P      | J05AB01  | 0.438       | 0.558  | 0.714   | 0.846   | 0.972   | 1.098   | 1.224   | 1.362   | 1.512   | 1.692   | 1.896    | 2.123    | 2.204    | 4             |
| Benzathine Benzylpenicillin              | P      | J01CE08  | 1.800       | 1.800  | 1.800   | 1.800   | 1.800   | 1.800   | 1.800   | 1.800   | 1.800   | 1.800   | 3.600    | 3.600    | 3.600    | 3.6           |
| Benzylpenicillin                         | P      | J01CE01  | 1.800       | 1.800  | 1.800   | 1.800   | 1.800   | 1.800   | 1.800   | 1.800   | 3.600   | 3.600   | 3.600    | 3.600    | 3.600    | 3.6           |
| Bicillin-5                               | P      | J01CE30  | 1.100       | 1.100  | 1.100   | 1.100   | 1.100   | 1.100   | 1.100   | 1.100   | 2.200   | 2.200   | 2.200    | 2.200    | 2.200    | 3.6           |
| Valaciclovir                             | O      | J05AB11  | 0           | 0      | 0       | 0       | 0       | 0       | 0       | 0       | 0       | 0       | 0        | 0        | 0        | 3             |
| Valganciclovir                           | O      | J05AB14  | 0           | 0      | 0       | 0       | 0       | 0       | 0       | 0       | 0       | 0       | 0        | 0        | 0        | 0.9           |
| Vancomycin                               | O      | A07AA09  | 0.292       | 0.372  | 0.476   | 0.564   | 0.648   | 0.732   | 0.816   | 0.908   | 1.008   | 1.128   | 1.264    | 1.416    | 1.601    | 2             |
| Vancomycin                               | P      | J01XA01  | 0.292       | 0.372  | 0.476   | 0.564   | 0.648   | 0.732   | 0.816   | 0.908   | 1.008   | 1.128   | 1.264    | 1.416    | 1.601    | 2             |
| Voriconazole                             | O      | J02AC03  | 0           | 0      | 0.190   | 0.226   | 0.259   | 0.293   | 0.326   | 0.363   | 0.403   | 0.451   | 0.506    | 0.566    | 0.640    | 0.4           |
| Voriconazole                             | P      | J02AC03  | 0           | 0      | 0.214   | 0.254   | 0.292   | 0.329   | 0.367   | 0.409   | 0.454   | 0.508   | 0.569    | 0.637    | 0.721    | 0.4           |
| Ganciclovir                              | O      | J05AB06  | 0           | 0      | 0       | 0       | 0       | 0       | 0       | 0       | 0       | 0       | 0        | 0        | 0        | 3             |
| Ganciclovir                              | P      | J05AB06  | 0           | 0      | 0       | 0       | 0       | 0       | 0       | 0       | 0       | 0       | 0        | 0        | 0        | 0.5           |
| Gentamicin                               | P      | J01GB03  | 0.037       | 0.056  | 0.071   | 0.071   | 0.081   | 0.092   | 0.102   | 0.114   | 0.126   | 0.141   | 0.158    | 0.177    | 0.200    | 0.24          |
| Griseofulvin                             | O      | D01BA01  | 0           | 0      | 0       | 0.141   | 0.162   | 0.183   | 0.204   | 0.227   | 0.252   | 0.282   | 0.316    | 0.354    | 0.400    | 0.5           |

|                         |   |         |       |       |       |       |       |       |       |       |       |       |       |       |       |      |
|-------------------------|---|---------|-------|-------|-------|-------|-------|-------|-------|-------|-------|-------|-------|-------|-------|------|
| Dalbavantsin            | P | J01XA04 | 0     | 0     | 0     | 0     | 0     | 0     | 0     | 0     | 0     | 0     | 0     | 0     | 0     | 1.5  |
| Daptomycin              | P | J01XX09 | 0     | 0.093 | 0.107 | 0.127 | 0.146 | 0.165 | 0.184 | 0.159 | 0.176 | 0.197 | 0.221 | 0.248 | 0.200 | 0.28 |
| Josamycin               | O | J01FA07 | 0.365 | 0.465 | 0.595 | 0.705 | 0.810 | 0.915 | 1.020 | 1.135 | 1.260 | 1.410 | 1.580 | 1.770 | 2.000 | 2    |
| Doxycycline             | O | J01AA02 | 0     | 0     | 0     | 0     | 0     | 0     | 0     | 0     | 0.100 | 0.100 | 0.100 | 0.100 | 0.100 | 0.1  |
| Doxycycline             | P | J01AA02 | 0     | 0     | 0     | 0     | 0     | 0     | 0     | 0     | 0.100 | 0.100 | 0.100 | 0.100 | 0.100 | 0.1  |
| Doripenem               | P | J01DH04 | 0     | 0     | 0     | 0     | 0     | 0     | 0     | 0     | 0     | 0     | 0     | 0     | 0     | 1.5  |
| Zanamivir               | O | J05AH01 | 0     | 0     | 0     | 0     | 0     | 0.020 | 0.020 | 0.020 | 0.020 | 0.020 | 0.020 | 0.020 | 0.020 | 0.02 |
| Isavuconazole           | O | J02AC05 | 0     | 0     | 0     | 0     | 0     | 0     | 0     | 0     | 0     | 0     | 0     | 0     | 0     | 0.2  |
| Isavuconazole           | P | J02AC05 | 0     | 0     | 0     | 0     | 0     | 0     | 0     | 0     | 0     | 0     | 0     | 0     | 0     | 0.2  |
| Imipenem and cilastatin | P | J01DH51 | 0.438 | 0.558 | 0.714 | 0.846 | 0.972 | 1.098 | 1.224 | 1.362 | 1.512 | 1.692 | 1.896 | 2.000 | 2.000 | 2    |
| Itraconazole            | O | J02AC02 | 0.037 | 0.047 | 0.060 | 0.071 | 0.081 | 0.092 | 0.102 | 0.114 | 0.126 | 0.141 | 0.158 | 0.177 | 0.200 | 0.2  |
| Kanamycin               | P | J01GB04 | 0.110 | 0.140 | 0.179 | 0.212 | 0.243 | 0.275 | 0.306 | 0.341 | 0.378 | 0.423 | 0.474 | 0.531 | 0.600 | 1    |
| Caspofungin             | P | J02AX04 | 0.026 | 0.031 | 0.037 | 0.043 | 0.048 | 0.052 | 0.057 | 0.061 | 0.070 | 0.070 | 0.070 | 0.070 | 0.070 | 0.05 |
| Ketoconazole            | O | J02AB02 | 0     | 0     | 0     | 0.100 | 0.100 | 0.100 | 0.100 | 0.100 | 0.100 | 0.100 | 0.200 | 0.200 | 0.200 | 0.2  |
| Clarithromycin          | O | J01FA09 | 0.110 | 0.140 | 0.179 | 0.212 | 0.243 | 0.275 | 0.306 | 0.341 | 0.378 | 0.423 | 0.474 | 0.500 | 0.500 | 0.5  |
| Clarithromycin          | P | J01FA09 | 0     | 0     | 0     | 0     | 0     | 0     | 0     | 0     | 0     | 0     | 0     | 0     | 0     | 1    |
| Clindamycin             | O | J01FF01 | 0     | 0     | 0     | 0     | 0     | 0     | 0     | 0     | 0     | 0     | 0     | 0     | 1.200 | 1.2  |
| Clindamycin             | P | J01FF01 | 0     | 0     | 0     | 0.564 | 0.648 | 0.732 | 0.816 | 0.908 | 1.008 | 1.128 | 1.264 | 1.416 | 1.601 | 1.8  |
| Co-Trimoxazole          | O | J01EE01 | 0.263 | 0.335 | 0.428 | 0.508 | 0.583 | 0.659 | 0.734 | 0.817 | 0.907 | 1.015 | 1.138 | 1.274 | 1.441 | 1.92 |
| Co-Trimoxazole          | P | J01EE01 | 0     | 0     | 0     | 0.508 | 0.583 | 0.659 | 0.734 | 0.817 | 0.907 | 1.015 | 1.138 | 1.274 | 1.441 | 1.92 |
| Levofloxacin            | O | J01MA12 | 0     | 0     | 0     | 0     | 0     | 0     | 0     | 0     | 0     | 0     | 0     | 0     | 0     | 0.5  |
| Levofloxacin            | P | J01MA12 | 0     | 0     | 0     | 0     | 0     | 0     | 0     | 0     | 0     | 0     | 0     | 0     | 0     | 0.5  |
| Linezolid               | O | J01XX08 | 0.219 | 0.279 | 0.357 | 0.423 | 0.486 | 0.549 | 0.612 | 0.681 | 0.756 | 0.846 | 0.948 | 1.062 | 1.200 | 1.2  |
| Linezolid               | P | J01XX08 | 0.219 | 0.279 | 0.357 | 0.423 | 0.486 | 0.549 | 0.612 | 0.681 | 0.756 | 0.846 | 0.948 | 1.062 | 1.200 | 1.2  |
| Lincomycin              | O | J01FF02 | 0     | 0     | 0     | 0.846 | 0.972 | 1.098 | 1.224 | 1.362 | 1.512 | 1.692 | 1.800 | 1.800 | 1.800 | 1.8  |
| Lincomycin              | P | J01FF02 | 0.146 | 0.186 | 0.238 | 0.282 | 0.324 | 0.366 | 0.408 | 0.454 | 0.504 | 0.564 | 0.632 | 0.708 | 0.801 | 1.8  |
| Lomefloxacin            | O | J01MA07 | 0     | 0     | 0     | 0     | 0     | 0     | 0     | 0     | 0     | 0     | 0     | 0     | 0     | 0.4  |
| Meropenem               | P | J01DH02 | 0.876 | 1.116 | 1.428 | 1.692 | 1.944 | 2.196 | 2.448 | 2.724 | 3.000 | 3.000 | 3.000 | 3.000 | 3.000 | 3    |
| Metronidazole           | O | P01AB01 | 0     | 0     | 0     | 0     | 0     | 0     | 0.500 | 0.500 | 0.500 | 0.500 | 0.500 | 0.500 | 0.500 | 2    |
| Metronidazole           | P | J01XD01 | 0.164 | 0.209 | 0.268 | 0.317 | 0.365 | 0.412 | 0.459 | 0.511 | 0.567 | 0.635 | 0.711 | 0.796 | 0.901 | 1.5  |
| Midecamycin             | O | J01FA03 | 0.365 | 0.465 | 0.595 | 0.705 | 0.810 | 0.915 | 1.020 | 1.135 | 1.200 | 1.200 | 1.200 | 1.200 | 1.200 | 1.2  |
| Micafungin              | P | J02AX05 | 0.029 | 0.037 | 0.048 | 0.056 | 0.065 | 0.073 | 0.082 | 0.091 | 0.100 | 0.100 | 0.100 | 0.100 | 0.100 | 0.1  |
| minocycline             | O | J01AA08 | 0     | 0     | 0     | 0     | 0     | 0     | 0     | 0     | 0.101 | 0.113 | 0.126 | 0.142 | 0.160 | 0.2  |
| Moxifloxacin            | O | J01MA14 | 0     | 0     | 0     | 0     | 0     | 0     | 0     | 0     | 0     | 0     | 0     | 0     | 0     | 0.4  |
| Moxifloxacin            | P | J01MA14 | 0     | 0     | 0     | 0     | 0     | 0     | 0     | 0     | 0     | 0     | 0     | 0     | 0     | 0.4  |
| Natamycin               | O | A07AA03 | 0     | 0     | 0     | 0.200 | 0.200 | 0.200 | 0.200 | 0.200 | 0.200 | 0.200 | 0.200 | 0.200 | 0.200 | 0.3  |

[illegible]

[illegible]

|               |   |         |       |       |       |       |       |       |       |       |       |       |       |       |       |     |
|---------------|---|---------|-------|-------|-------|-------|-------|-------|-------|-------|-------|-------|-------|-------|-------|-----|
| Cefuroxime    | P | J01DC02 | 0.730 | 0.930 | 1.190 | 1.410 | 1.620 | 1.830 | 2.040 | 2.270 | 2.520 | 2.820 | 3.000 | 3.000 | 3.000 | 3   |
| Cefuroxime    | O | J01DC03 | 0.110 | 0.140 | 0.179 | 0.212 | 0.243 | 0.275 | 0.306 | 0.341 | 0.378 | 0.423 | 0.474 | 0.500 | 0.500 | 0.5 |
| Ciprofloxacin | O | J01MA02 | 0     | 0     | 0     | 0     | 0     | 0.732 | 0.816 | 0.908 | 1.000 | 1.000 | 1.000 | 1.000 | 1.000 | 1   |
| Ciprofloxacin | P | J01MA02 | 0     | 0     | 0     | 0     | 0     | 0.549 | 0.612 | 0.681 | 0.756 | 0.800 | 0.800 | 0.800 | 0.800 | 0.8 |
| Erythromycin  | O | J01FA01 | 0     | 0     | 0     | 0     | 0     | 0     | 0     | 0     | 0     | 0     | 0     | 0     | 0     | 1   |
| Erythromycin  | P | J01FA01 | 0.365 | 0.465 | 0.595 | 0.705 | 0.810 | 0.915 | 1.000 | 1.000 | 1.000 | 1.000 | 1.000 | 1.000 | 1.000 | 1   |
| Ertapenem     | P | J01DH03 | 0.219 | 0.279 | 0.357 | 0.423 | 0.486 | 0.549 | 0.612 | 0.681 | 0.756 | 0.846 | 0.948 | 1.000 | 1.000 | 1   |

Adm.R - rout of administration, O – oral, P – parenteral

**Supplementary Table S2.** Calculated weight values for children aged 1 month - 12 years, kg [2]

| Age, years | Q1   | Me   | Q3   | M    | SD   |
|------------|------|------|------|------|------|
| 1-11 month | 6.7  | 7.3  | 7.9  | 7.3  | 0.89 |
| 1 year     | 8.6  | 9.3  | 10.0 | 9.3  | 1.07 |
| 2 years    | 11.0 | 11.8 | 12.8 | 11.9 | 1.37 |
| 3 years    | 13.0 | 14.1 | 15.4 | 14.1 | 1.78 |
| 4 years    | 14.8 | 16.2 | 17.8 | 16.3 | 2.15 |
| 5 years    | 16.6 | 18.2 | 20.2 | 18.3 | 2.63 |
| 6 years    | 18.6 | 20.4 | 22.4 | 20.5 | 2.89 |
| 7 years    | 20.6 | 22.6 | 25.0 | 22.8 | 3.33 |
| 8 years    | 22.8 | 25.2 | 28.0 | 25.3 | 3.89 |
| 9 years    | 25.4 | 28.2 | 31.5 | 28.3 | 4.56 |
| 10 years   | 28.2 | 31.6 | 35.4 | 31.7 | 5.30 |
| 11 years   | 30.9 | 35.4 | 41.2 | 35.8 | 7.59 |
| 12 years   | 34.8 | 40.0 | 46.6 | 40.5 | 8.78 |

Q1 - 1<sup>st</sup> quartile (25<sup>th</sup> percentile); Me - median (50<sup>th</sup> percentile); Q3 - 3<sup>rd</sup> quartile (75<sup>th</sup> percentile); M – mean; SD - standard deviation

**Supplementary Table S3.** Calculated body surface area values for children aged 1 month - 12 years, kg [2]

| Age, years | Q1   | Me   | Q3   | M    | SD    |
|------------|------|------|------|------|-------|
| 1 year     | 0.35 | 0.37 | 0.38 | 0.37 | 0.028 |
| 2 years    | 0.42 | 0.44 | 0.46 | 0.44 | 0.032 |
| 3 years    | 0.51 | 0.53 | 0.56 | 0.53 | 0.041 |
| 4 years    | 0.58 | 0.61 | 0.65 | 0.61 | 0.050 |
| 5 years    | 0.64 | 0.68 | 0.72 | 0.68 | 0.059 |
| 6 years    | 0.70 | 0.75 | 0.80 | 0.75 | 0.069 |
| 7 years    | 0.76 | 0.81 | 0.86 | 0.81 | 0.075 |
| 8 years    | 0.82 | 0.87 | 0.93 | 0.88 | 0.083 |
| 9 years    | 0.88 | 0.94 | 1.01 | 0.95 | 0.094 |
| 10 years   | 0.95 | 1.02 | 1.09 | 1.02 | 0.105 |
| 11 years   | 1.02 | 1.10 | 1.18 | 1.10 | 0.118 |
| 12 years   | 1.09 | 1.19 | 1.30 | 1.20 | 0.155 |
| 1 year     | 1.19 | 1.29 | 1.42 | 1.30 | 0.171 |

Q1 - 1<sup>st</sup> quartile (25<sup>th</sup> percentile); Me - median (50<sup>th</sup> percentile); Q3 - 3<sup>rd</sup> quartile (75<sup>th</sup> percentile); M – mean; SD - standard deviation

**Supplementary Table S4.** AMs consumption assessment by means of the proposed methodology vs the conventional ATC/DDD methodology in a three multi-field hospitals (combined data)

| INN                                       | Adm.R* | ATC code | AMs consumption |                           |                          |
|-------------------------------------------|--------|----------|-----------------|---------------------------|--------------------------|
|                                           |        |          | g               | proposed methodology, DID | ATC/DDD methodology, DID |
| Azithromycin                              | O      | J01FA10  | 4619.6          | 3.32                      | 3.06                     |
| Azithromycin                              | P      | J01FA10  | 933.5           | 0.37                      | 0.37                     |
| Amikacin                                  | P      | J01GB06  | 3125            | 0.70                      | 0.62                     |
| Amoxicillin                               | O      | J01CA04  | 4689.5          | 0.66                      | 0.62                     |
| Amoxicillin and beta-lactamase inhibitor  | O      | J01CR02  | 23336.6         | 3.30                      | 3.09                     |
| Amoxicillin and beta-lactamase inhibitor  | P      | J01CR02  | 21788           | 1.56                      | 1.44                     |
| Ampicillin                                | P      | J01CA01  | 700             | 0.03                      | 0.02                     |
| Ampicillin and beta-lactamase inhibitor   | P      | J01CR01  | 1085.5          | 0.04                      | 0.04                     |
| Acyclovir                                 | O      | J05AB01  | 1816            | 0.1                       | 0.09                     |
| Acyclovir                                 | P      | J05AB01  | 618.25          | 0.04                      | 0.03                     |
| Benzathine Benzylpenicillin               | P      | J01CE08  | 42              | 0.003                     | 0.002                    |
| Valaciclovir                              | O      | J05AB11  | 125             | 0.01                      | 0.01                     |
| Valganciclovir                            | O      | J05AB14  | 27              | 0.01                      | 0.01                     |
| Vancomycin                                | P      | J01XA01  | 7274.9          | 0.82                      | 0.72                     |
| Voriconazole                              | O      | J02AC03  | 11.2            | 0.01                      | 0.01                     |
| Voriconazole                              | P      | J02AC03  | 114.4           | 0.06                      | 0.06                     |
| Ganciclovir                               | P      | J05AB06  | 9.5             | 0.004                     | 0.004                    |
| Gentamicin                                | P      | J01GB03  | 561.6           | 0.52                      | 0.46                     |
| Josamycin                                 | O      | J01FA07  | 25              | 0.003                     | 0.002                    |
| Doxycycline                               | O      | J01AA02  | 422             | 0.84                      | 0.84                     |
| Doripenem                                 | P      | J01DH04  | 345.5           | 0.05                      | 0.05                     |
| Zanamivir                                 | O      | J05AH01  | 0.2             | 0.002                     | 0.002                    |
| Imipenem and cilastatin                   | P      | J01DH51  | 2690            | 0.29                      | 0.27                     |
| Caspofungin                               | P      | J02AX04  | 7.6             | 0.03                      | 0.03                     |
| Clarithromycin                            | O      | J01FA09  | 1251.5          | 0.54                      | 0.5                      |
| Clarithromycin                            | P      | J01FA09  | 324             | 0.06                      | 0.06                     |
| Clindamycin                               | P      | J01FF01  | 9               | 0.001                     | 0.001                    |
| Co-Trimoxazole                            | O      | J01EE01  | 5350.56         | 0.63                      | 0.55                     |
| Levofloxacin                              | O      | J01MA12  | 4920            | 1.96                      | 1.96                     |
| Levofloxacin                              | P      | J01MA12  | 2742.5          | 1.09                      | 1.09                     |
| Linezolid                                 | O      | J01XX08  | 335.4           | 0.06                      | 0.06                     |
| Linezolid                                 | P      | J01XX08  | 960             | 0.18                      | 0.16                     |
| Lincomycin                                | P      | J01FF02  | 7701            | 0.99                      | 0.85                     |
| Meropenem                                 | P      | J01DH02  | 23880           | 1.69                      | 1.58                     |
| Metronidazole                             | O      | P01AB01  | 12420           | 1.32                      | 1.23                     |
| Metronidazole                             | P      | J01XD01  | 8116.1          | 1.24                      | 1.08                     |
| Midecamycin                               | O      | J01FA03  | 535.2           | 0.09                      | 0.09                     |
| Micafungin                                | P      | J02AX05  | 20.45           | 0.04                      | 0.04                     |
| Moxifloxacin                              | O      | J01MA14  | 24              | 0.01                      | 0.01                     |
| Moxifloxacin                              | P      | J01MA14  | 223.6           | 0.11                      | 0.11                     |
| Nifuroxazide                              | O      | A07AX03  | 225.72          | 0.08                      | 0.07                     |
| Norfloxacin                               | O      | J01MA06  | 40              | 0.01                      | 0.01                     |
| Oxacillin                                 | P      | J01CF04  | 465             | 0.05                      | 0.05                     |
| Oseltamivir                               | O      | J05AH02  | 118.2           | 0.17                      | 0.16                     |
| Piperacillin and beta-lactamase inhibitor | P      | J01CR05  | 2896            | 0.04                      | 0.04                     |
| Posaconazole                              | O      | J02AC04  | 63              | 0.04                      | 0.04                     |
| Polymyxin B                               | P      | J01XB02  | 297             | 0.45                      | 0.39                     |
| Rimantadine                               | O      | J05AC02  | 89              | 0.1                       | 0.09                     |



|                                           |   |         |          |              |             |
|-------------------------------------------|---|---------|----------|--------------|-------------|
| Tigecycline                               | P | J01AA12 | 2.5      | 0.005        | 0.005       |
| Umifenovir                                | O | J05AX13 | 1238     | 0.33         | 0.31        |
| Favipiravir                               | O | J05AX27 | 544      | 0.07         | 0.07        |
| Fluconazole                               | O | J02AC01 | 580.8    | 0.58         | 0.58        |
| Fluconazole                               | P | J02AC01 | 326.2    | 0.34         | 0.32        |
| Fosfomycin                                | O | J01XX01 | 170      | 0.01         | 0.01        |
| Fosfomycin                                | P | J01XX01 | 3720     | 0.10         | 0.09        |
| Furazidin                                 | O | J01XE03 | 4.5      | 0.003        | 0.003       |
| Chloramphenicol                           | O | J01BA01 | 240      | 0.02         | 0.02        |
| Cefazolin                                 | P | J01DB04 | 16602    | 1.19         | 1.1         |
| Cefepime                                  | P | J01DE01 | 28693    | 1.53         | 1.43        |
| Cefixime                                  | O | J01DD08 | 38.4     | 0.02         | 0.02        |
| Cefoperazone and beta-lactamase inhibitor | P | J01DD62 | 37666.5  | 2.12         | 1.87        |
| Cefotaxime                                | P | J01DD01 | 34081    | 1.88         | 1.69        |
| Ceftazidime                               | P | J01DD02 | 4552     | 0.24         | 0.23        |
| Ceftazidime and beta-lactamase inhibitor  | P | J01DD52 | 242      | 0.01         | 0.01        |
| Ceftaroline                               | P | J01DI02 | 44.4     | 0.01         | 0.01        |
| Ceftriaxone                               | P | J01DD04 | 134041.5 | 13.99        | 13.32       |
| Cefuroxime                                | P | J01DC02 | 3372.75  | 0.02         | 0.02        |
| Cefuroxime                                | O | J01DC03 | 50       | 0.24         | 0.22        |
| Ciprofloxacin                             | O | J01MA02 | 15495    | 3.1          | 3.08        |
| Ciprofloxacin                             | P | J01MA02 | 5363.6   | 1.35         | 1.33        |
| Ertapenem                                 | P | J01DH03 | 2539     | 0.55         | 0.5         |
| <b>Total</b>                              |   |         |          | <b>51.38</b> | <b>48.3</b> |

Adm.R - rout of administration. O – oral. P – parenteral

### Influence of pediatric inpatients' share on the total level of AMs consumption in a multi-field hospital, %

Level of underestimation of AMs consumption assessed by means of the standard ATC/DDD methodology in comparison to the pediatric-adjusted methodology:

|                                                                                    |         |
|------------------------------------------------------------------------------------|---------|
|  | ≤10%    |
|  | 11%-24% |
|  | 25%-49% |
|  | 50%-74% |
|  | 75%-99% |
|  | ≥100%   |

**Supplementary Table S5.** Differences between AMs' consumption levels calculated by means of novel pediatric-adjusted methodology vs conventional ATC/DDD methodology for a whole set of AMs (base case), %

| Share /<br>Age<br>group | 1-11<br>month | 1<br>year | 2<br>years | 3<br>years | 4<br>years | 5<br>years | 6<br>years | 7<br>years | 8<br>years | 9<br>years | 10<br>years | 11<br>years | 12<br>years |
|-------------------------|---------------|-----------|------------|------------|------------|------------|------------|------------|------------|------------|-------------|-------------|-------------|
| 1%                      | 1             | 1         | 1          | 0          | 0          | 0          | 0          | 0          | 0          | 0          | 0           | 0           | 0           |
| 2%                      | 1             | 1         | 1          | 1          | 1          | 1          | 1          | 0          | 0          | 0          | 0           | 0           | 0           |
| 3%                      | 2             | 2         | 2          | 1          | 1          | 1          | 1          | 1          | 0          | 0          | 0           | 0           | 0           |
| 4%                      | 3             | 3         | 2          | 2          | 2          | 1          | 1          | 1          | 1          | 1          | 0           | 0           | 0           |
| 5%                      | 4             | 3         | 3          | 2          | 2          | 2          | 1          | 1          | 1          | 1          | 1           | 0           | 0           |
| 6%                      | 4             | 4         | 3          | 3          | 2          | 2          | 2          | 1          | 1          | 1          | 1           | 1           | 0           |
| 7%                      | 5             | 5         | 4          | 3          | 3          | 2          | 2          | 1          | 1          | 1          | 1           | 1           | 0           |
| 8%                      | 6             | 5         | 5          | 4          | 3          | 3          | 2          | 2          | 1          | 1          | 1           | 1           | 1           |
| 9%                      | 7             | 6         | 5          | 4          | 4          | 3          | 2          | 2          | 1          | 1          | 1           | 1           | 1           |
| 10%                     | 8             | 7         | 6          | 5          | 4          | 3          | 3          | 2          | 2          | 1          | 1           | 1           | 1           |
| 11%                     | 9             | 8         | 6          | 5          | 4          | 4          | 3          | 2          | 2          | 1          | 1           | 1           | 1           |
| 12%                     | 9             | 8         | 7          | 6          | 5          | 4          | 3          | 3          | 2          | 2          | 1           | 1           | 1           |
| 13%                     | 10            | 9         | 8          | 6          | 5          | 4          | 3          | 3          | 2          | 2          | 1           | 1           | 1           |
| 14%                     | 11            | 10        | 8          | 7          | 6          | 5          | 4          | 3          | 2          | 2          | 2           | 1           | 1           |
| 15%                     | 12            | 11        | 9          | 8          | 6          | 5          | 4          | 3          | 3          | 2          | 2           | 1           | 1           |
| 16%                     | 13            | 12        | 10         | 8          | 7          | 5          | 4          | 4          | 3          | 2          | 2           | 1           | 1           |
| 17%                     | 14            | 12        | 10         | 9          | 7          | 6          | 5          | 4          | 3          | 2          | 2           | 2           | 1           |
| 18%                     | 15            | 13        | 11         | 9          | 8          | 6          | 5          | 4          | 3          | 2          | 2           | 2           | 1           |
| 19%                     | 16            | 14        | 12         | 10         | 8          | 6          | 5          | 4          | 3          | 3          | 2           | 2           | 1           |
| 20%                     | 17            | 15        | 12         | 10         | 9          | 7          | 6          | 5          | 3          | 3          | 2           | 2           | 1           |
| 21%                     | 18            | 16        | 13         | 11         | 9          | 7          | 6          | 5          | 4          | 3          | 2           | 2           | 2           |
| 22%                     | 19            | 17        | 14         | 12         | 9          | 8          | 6          | 5          | 4          | 3          | 3           | 2           | 2           |
| 23%                     | 20            | 18        | 15         | 12         | 10         | 8          | 6          | 5          | 4          | 3          | 3           | 2           | 2           |
| 24%                     | 21            | 18        | 15         | 13         | 10         | 8          | 7          | 6          | 4          | 3          | 3           | 2           | 2           |
| 25%                     | 22            | 19        | 16         | 13         | 11         | 9          | 7          | 6          | 4          | 4          | 3           | 2           | 2           |
| 26%                     | 23            | 20        | 17         | 14         | 11         | 9          | 7          | 6          | 5          | 4          | 3           | 3           | 2           |
| 27%                     | 24            | 21        | 18         | 15         | 12         | 10         | 8          | 6          | 5          | 4          | 3           | 3           | 2           |
| 28%                     | 25            | 22        | 18         | 15         | 13         | 10         | 8          | 7          | 5          | 4          | 3           | 3           | 2           |
| 29%                     | 26            | 23        | 19         | 16         | 13         | 10         | 8          | 7          | 5          | 4          | 3           | 3           | 2           |
| 30%                     | 28            | 24        | 20         | 17         | 14         | 11         | 9          | 7          | 5          | 4          | 4           | 3           | 2           |
| 31%                     | 29            | 25        | 21         | 17         | 14         | 11         | 9          | 8          | 6          | 5          | 4           | 3           | 2           |
| 32%                     | 30            | 26        | 22         | 18         | 15         | 12         | 10         | 8          | 6          | 5          | 4           | 3           | 2           |
| 33%                     | 31            | 27        | 23         | 19         | 15         | 12         | 10         | 8          | 6          | 5          | 4           | 3           | 3           |
| 34%                     | 32            | 28        | 23         | 19         | 16         | 12         | 10         | 8          | 6          | 5          | 4           | 4           | 3           |
| 35%                     | 34            | 29        | 24         | 20         | 16         | 13         | 11         | 9          | 7          | 5          | 4           | 4           | 3           |
| 36%                     | 35            | 31        | 25         | 21         | 17         | 13         | 11         | 9          | 7          | 6          | 4           | 4           | 3           |
| 37%                     | 36            | 32        | 26         | 21         | 18         | 14         | 11         | 9          | 7          | 6          | 5           | 4           | 3           |
| 38%                     | 38            | 33        | 27         | 22         | 18         | 14         | 12         | 10         | 7          | 6          | 5           | 4           | 3           |
| 39%                     | 39            | 34        | 28         | 23         | 19         | 15         | 12         | 10         | 8          | 6          | 5           | 4           | 3           |
| 40%                     | 41            | 35        | 29         | 24         | 19         | 15         | 13         | 10         | 8          | 6          | 5           | 4           | 3           |
| 41%                     | 42            | 37        | 30         | 24         | 20         | 16         | 13         | 11         | 8          | 6          | 5           | 4           | 3           |
| 42%                     | 44            | 38        | 31         | 25         | 21         | 16         | 13         | 11         | 8          | 7          | 5           | 5           | 3           |
| 43%                     | 45            | 39        | 32         | 26         | 21         | 17         | 14         | 11         | 9          | 7          | 6           | 5           | 4           |
| 44%                     | 47            | 40        | 33         | 27         | 22         | 17         | 14         | 12         | 9          | 7          | 6           | 5           | 4           |
| 45%                     | 48            | 42        | 34         | 28         | 22         | 18         | 15         | 12         | 9          | 7          | 6           | 5           | 4           |
| 46%                     | 50            | 43        | 35         | 28         | 23         | 18         | 15         | 12         | 9          | 8          | 6           | 5           | 4           |
| 47%                     | 52            | 44        | 36         | 29         | 24         | 19         | 15         | 13         | 10         | 8          | 6           | 5           | 4           |

|      |     |     |     |     |    |    |    |    |    |    |    |    |    |
|------|-----|-----|-----|-----|----|----|----|----|----|----|----|----|----|
| 48%  | 53  | 46  | 37  | 30  | 25 | 19 | 16 | 13 | 10 | 8  | 6  | 5  | 4  |
| 49%  | 55  | 47  | 38  | 31  | 25 | 20 | 16 | 13 | 10 | 8  | 7  | 6  | 4  |
| 50%  | 57  | 49  | 39  | 32  | 26 | 20 | 17 | 14 | 10 | 8  | 7  | 6  | 4  |
| 51%  | 59  | 50  | 41  | 33  | 27 | 21 | 17 | 14 | 11 | 9  | 7  | 6  | 4  |
| 52%  | 61  | 52  | 42  | 34  | 27 | 21 | 18 | 14 | 11 | 9  | 7  | 6  | 5  |
| 53%  | 62  | 53  | 43  | 35  | 28 | 22 | 18 | 15 | 11 | 9  | 7  | 6  | 5  |
| 54%  | 64  | 55  | 44  | 36  | 29 | 23 | 19 | 15 | 12 | 9  | 8  | 6  | 5  |
| 55%  | 67  | 57  | 46  | 37  | 30 | 23 | 19 | 16 | 12 | 10 | 8  | 7  | 5  |
| 56%  | 69  | 58  | 47  | 38  | 30 | 24 | 20 | 16 | 12 | 10 | 8  | 7  | 5  |
| 57%  | 71  | 60  | 48  | 39  | 31 | 24 | 20 | 16 | 13 | 10 | 8  | 7  | 5  |
| 58%  | 73  | 62  | 49  | 40  | 32 | 25 | 21 | 17 | 13 | 10 | 8  | 7  | 5  |
| 59%  | 75  | 64  | 51  | 41  | 33 | 26 | 21 | 17 | 13 | 11 | 9  | 7  | 6  |
| 60%  | 78  | 66  | 52  | 42  | 34 | 26 | 22 | 18 | 13 | 11 | 9  | 7  | 6  |
| 61%  | 80  | 67  | 54  | 43  | 35 | 27 | 22 | 18 | 14 | 11 | 9  | 8  | 6  |
| 62%  | 82  | 69  | 55  | 44  | 35 | 28 | 23 | 19 | 14 | 11 | 9  | 8  | 6  |
| 63%  | 85  | 71  | 57  | 45  | 36 | 28 | 23 | 19 | 15 | 12 | 10 | 8  | 6  |
| 64%  | 88  | 73  | 58  | 46  | 37 | 29 | 24 | 19 | 15 | 12 | 10 | 8  | 6  |
| 65%  | 90  | 76  | 60  | 48  | 38 | 30 | 25 | 20 | 15 | 12 | 10 | 8  | 6  |
| 66%  | 93  | 78  | 61  | 49  | 39 | 30 | 25 | 20 | 16 | 13 | 10 | 9  | 7  |
| 67%  | 96  | 80  | 63  | 50  | 40 | 31 | 26 | 21 | 16 | 13 | 11 | 9  | 7  |
| 68%  | 99  | 82  | 65  | 51  | 41 | 32 | 26 | 21 | 16 | 13 | 11 | 9  | 7  |
| 69%  | 102 | 85  | 66  | 53  | 42 | 32 | 27 | 22 | 17 | 14 | 11 | 9  | 7  |
| 70%  | 105 | 87  | 68  | 54  | 43 | 33 | 28 | 22 | 17 | 14 | 11 | 9  | 7  |
| 71%  | 108 | 90  | 70  | 55  | 44 | 34 | 28 | 23 | 18 | 14 | 12 | 10 | 7  |
| 72%  | 112 | 92  | 72  | 57  | 45 | 35 | 29 | 24 | 18 | 15 | 12 | 10 | 8  |
| 73%  | 115 | 95  | 74  | 58  | 46 | 36 | 30 | 24 | 18 | 15 | 12 | 10 | 8  |
| 74%  | 119 | 98  | 76  | 59  | 47 | 36 | 30 | 25 | 19 | 15 | 12 | 10 | 8  |
| 75%  | 123 | 100 | 78  | 61  | 49 | 37 | 31 | 25 | 19 | 16 | 13 | 11 | 8  |
| 76%  | 127 | 103 | 80  | 62  | 50 | 38 | 32 | 26 | 20 | 16 | 13 | 11 | 8  |
| 77%  | 131 | 106 | 82  | 64  | 51 | 39 | 33 | 26 | 20 | 16 | 13 | 11 | 9  |
| 78%  | 135 | 110 | 84  | 66  | 52 | 40 | 33 | 27 | 21 | 17 | 14 | 11 | 9  |
| 79%  | 139 | 113 | 86  | 67  | 53 | 41 | 34 | 28 | 21 | 17 | 14 | 12 | 9  |
| 80%  | 144 | 116 | 89  | 69  | 55 | 42 | 35 | 28 | 22 | 18 | 14 | 12 | 9  |
| 81%  | 149 | 120 | 91  | 71  | 56 | 43 | 36 | 29 | 22 | 18 | 15 | 12 | 9  |
| 82%  | 154 | 123 | 93  | 73  | 57 | 44 | 37 | 30 | 23 | 18 | 15 | 13 | 10 |
| 83%  | 159 | 127 | 96  | 74  | 59 | 45 | 37 | 30 | 23 | 19 | 15 | 13 | 10 |
| 84%  | 165 | 131 | 99  | 76  | 60 | 46 | 38 | 31 | 24 | 19 | 16 | 13 | 10 |
| 85%  | 170 | 135 | 101 | 78  | 62 | 47 | 39 | 32 | 24 | 20 | 16 | 13 | 10 |
| 86%  | 177 | 140 | 104 | 80  | 63 | 48 | 40 | 33 | 25 | 20 | 16 | 14 | 11 |
| 87%  | 183 | 144 | 107 | 83  | 65 | 49 | 41 | 33 | 26 | 21 | 17 | 14 | 11 |
| 88%  | 190 | 149 | 110 | 85  | 66 | 50 | 42 | 34 | 26 | 21 | 17 | 14 | 11 |
| 89%  | 197 | 154 | 114 | 87  | 68 | 51 | 43 | 35 | 27 | 22 | 18 | 15 | 11 |
| 90%  | 204 | 159 | 117 | 89  | 70 | 53 | 44 | 36 | 27 | 22 | 18 | 15 | 12 |
| 91%  | 213 | 164 | 121 | 92  | 72 | 54 | 45 | 37 | 28 | 23 | 19 | 16 | 12 |
| 92%  | 221 | 170 | 124 | 94  | 74 | 55 | 47 | 38 | 29 | 23 | 19 | 16 | 12 |
| 93%  | 230 | 176 | 128 | 97  | 75 | 57 | 48 | 38 | 30 | 24 | 19 | 16 | 13 |
| 94%  | 240 | 183 | 132 | 100 | 77 | 58 | 49 | 39 | 30 | 25 | 20 | 17 | 13 |
| 95%  | 251 | 190 | 136 | 103 | 80 | 59 | 50 | 40 | 31 | 25 | 20 | 17 | 13 |
| 96%  | 263 | 197 | 141 | 106 | 82 | 61 | 51 | 41 | 32 | 26 | 21 | 18 | 14 |
| 97%  | 275 | 205 | 146 | 109 | 84 | 63 | 53 | 42 | 33 | 27 | 22 | 18 | 14 |
| 98%  | 289 | 214 | 151 | 112 | 86 | 64 | 54 | 44 | 34 | 27 | 22 | 19 | 15 |
| 99%  | 304 | 223 | 156 | 116 | 89 | 66 | 56 | 45 | 34 | 28 | 23 | 19 | 15 |
| 100% | 321 | 233 | 162 | 119 | 91 | 68 | 57 | 46 | 35 | 29 | 23 | 20 | 15 |

**Supplementary Table S6.** Differences between AMs' consumption levels calculated by means of novel pediatric-adjusted methodology vs conventional ATC/DDD methodology for a whole set of AMs (alternative case), %

| Share /<br>Age<br>group | 1-11<br>month | 1<br>year | 2<br>years | 3<br>years | 4<br>years | 5<br>years | 6<br>years | 7<br>years | 8<br>years | 9<br>years | 10<br>years | 11<br>years | 12<br>years |
|-------------------------|---------------|-----------|------------|------------|------------|------------|------------|------------|------------|------------|-------------|-------------|-------------|
| 1%                      | 1             | 0         | 0          | 0          | 0          | 0          | 0          | 0          | 0          | 0          | 0           | 0           | 0           |
| 2%                      | 1             | 1         | 1          | 1          | 1          | 1          | 0          | 0          | 0          | 0          | 0           | 0           | 0           |
| 3%                      | 2             | 2         | 1          | 1          | 1          | 1          | 1          | 1          | 0          | 0          | 0           | 0           | 0           |
| 4%                      | 2             | 2         | 2          | 1          | 1          | 1          | 1          | 1          | 1          | 0          | 0           | 0           | 0           |
| 5%                      | 3             | 3         | 2          | 2          | 2          | 1          | 1          | 1          | 1          | 1          | 0           | 0           | 0           |
| 6%                      | 3             | 3         | 3          | 2          | 2          | 2          | 1          | 1          | 1          | 1          | 1           | 0           | 0           |
| 7%                      | 4             | 4         | 3          | 3          | 2          | 2          | 2          | 1          | 1          | 1          | 1           | 1           | 0           |
| 8%                      | 5             | 4         | 4          | 3          | 3          | 2          | 2          | 2          | 1          | 1          | 1           | 1           | 0           |
| 9%                      | 5             | 5         | 4          | 3          | 3          | 3          | 2          | 2          | 1          | 1          | 1           | 1           | 1           |
| 10%                     | 6             | 5         | 5          | 4          | 3          | 3          | 2          | 2          | 2          | 1          | 1           | 1           | 1           |
| 11%                     | 6             | 6         | 5          | 4          | 4          | 3          | 3          | 2          | 2          | 1          | 1           | 1           | 1           |
| 12%                     | 7             | 6         | 5          | 5          | 4          | 3          | 3          | 2          | 2          | 1          | 1           | 1           | 1           |
| 13%                     | 8             | 7         | 6          | 5          | 4          | 4          | 3          | 3          | 2          | 2          | 1           | 1           | 1           |
| 14%                     | 8             | 8         | 6          | 5          | 5          | 4          | 3          | 3          | 2          | 2          | 1           | 1           | 1           |
| 15%                     | 9             | 8         | 7          | 6          | 5          | 4          | 4          | 3          | 2          | 2          | 2           | 1           | 1           |
| 16%                     | 10            | 9         | 7          | 6          | 5          | 5          | 4          | 3          | 2          | 2          | 2           | 1           | 1           |
| 17%                     | 11            | 9         | 8          | 7          | 6          | 5          | 4          | 3          | 3          | 2          | 2           | 1           | 1           |
| 18%                     | 11            | 10        | 9          | 7          | 6          | 5          | 4          | 4          | 3          | 2          | 2           | 2           | 1           |
| 19%                     | 12            | 11        | 9          | 8          | 6          | 6          | 5          | 4          | 3          | 2          | 2           | 2           | 1           |
| 20%                     | 13            | 11        | 10         | 8          | 7          | 6          | 5          | 4          | 3          | 3          | 2           | 2           | 1           |
| 21%                     | 13            | 12        | 10         | 9          | 7          | 6          | 5          | 4          | 3          | 3          | 2           | 2           | 1           |
| 22%                     | 14            | 13        | 11         | 9          | 7          | 7          | 6          | 5          | 4          | 3          | 2           | 2           | 1           |
| 23%                     | 15            | 13        | 11         | 10         | 8          | 7          | 6          | 5          | 4          | 3          | 2           | 2           | 2           |
| 24%                     | 16            | 14        | 12         | 10         | 8          | 7          | 6          | 5          | 4          | 3          | 3           | 2           | 2           |
| 25%                     | 17            | 15        | 12         | 11         | 9          | 8          | 6          | 5          | 4          | 3          | 3           | 2           | 2           |
| 26%                     | 17            | 15        | 13         | 11         | 9          | 8          | 7          | 6          | 4          | 3          | 3           | 2           | 2           |
| 27%                     | 18            | 16        | 14         | 11         | 9          | 8          | 7          | 6          | 4          | 4          | 3           | 2           | 2           |
| 28%                     | 19            | 17        | 14         | 12         | 10         | 9          | 7          | 6          | 5          | 4          | 3           | 3           | 2           |
| 29%                     | 20            | 18        | 15         | 12         | 10         | 9          | 8          | 6          | 5          | 4          | 3           | 3           | 2           |
| 30%                     | 21            | 18        | 16         | 13         | 11         | 9          | 8          | 7          | 5          | 4          | 3           | 3           | 2           |
| 31%                     | 22            | 19        | 16         | 14         | 11         | 10         | 8          | 7          | 5          | 4          | 3           | 3           | 2           |
| 32%                     | 23            | 20        | 17         | 14         | 12         | 10         | 9          | 7          | 5          | 4          | 4           | 3           | 2           |
| 33%                     | 24            | 21        | 17         | 15         | 12         | 11         | 9          | 7          | 6          | 5          | 4           | 3           | 2           |
| 34%                     | 25            | 22        | 18         | 15         | 12         | 11         | 9          | 8          | 6          | 5          | 4           | 3           | 2           |
| 35%                     | 26            | 23        | 19         | 16         | 13         | 11         | 10         | 8          | 6          | 5          | 4           | 3           | 3           |
| 36%                     | 27            | 23        | 19         | 16         | 13         | 12         | 10         | 8          | 6          | 5          | 4           | 3           | 3           |
| 37%                     | 28            | 24        | 20         | 17         | 14         | 12         | 10         | 8          | 6          | 5          | 4           | 4           | 3           |
| 38%                     | 29            | 25        | 21         | 17         | 14         | 13         | 11         | 9          | 7          | 5          | 4           | 4           | 3           |
| 39%                     | 30            | 26        | 22         | 18         | 15         | 13         | 11         | 9          | 7          | 6          | 5           | 4           | 3           |
| 40%                     | 31            | 27        | 22         | 19         | 15         | 13         | 11         | 9          | 7          | 6          | 5           | 4           | 3           |
| 41%                     | 32            | 28        | 23         | 19         | 16         | 14         | 12         | 10         | 7          | 6          | 5           | 4           | 3           |
| 42%                     | 33            | 29        | 24         | 20         | 16         | 14         | 12         | 10         | 8          | 6          | 5           | 4           | 3           |
| 43%                     | 34            | 30        | 25         | 20         | 17         | 15         | 12         | 10         | 8          | 6          | 5           | 4           | 3           |
| 44%                     | 35            | 31        | 25         | 21         | 17         | 15         | 13         | 10         | 8          | 7          | 5           | 4           | 3           |
| 45%                     | 37            | 32        | 26         | 22         | 18         | 16         | 13         | 11         | 8          | 7          | 5           | 5           | 3           |
| 46%                     | 38            | 33        | 27         | 22         | 18         | 16         | 14         | 11         | 9          | 7          | 6           | 5           | 4           |
| 47%                     | 39            | 34        | 28         | 23         | 19         | 16         | 14         | 11         | 9          | 7          | 6           | 5           | 4           |

|      |     |     |     |    |    |    |    |    |    |    |    |    |    |
|------|-----|-----|-----|----|----|----|----|----|----|----|----|----|----|
| 48%  | 40  | 35  | 29  | 24 | 19 | 17 | 14 | 12 | 9  | 7  | 6  | 5  | 4  |
| 49%  | 42  | 36  | 30  | 24 | 20 | 17 | 15 | 12 | 9  | 8  | 6  | 5  | 4  |
| 50%  | 43  | 37  | 30  | 25 | 20 | 18 | 15 | 12 | 10 | 8  | 6  | 5  | 4  |
| 51%  | 45  | 38  | 31  | 26 | 21 | 18 | 16 | 13 | 10 | 8  | 6  | 5  | 4  |
| 52%  | 46  | 40  | 32  | 27 | 22 | 19 | 16 | 13 | 10 | 8  | 7  | 6  | 4  |
| 53%  | 47  | 41  | 33  | 27 | 22 | 19 | 16 | 13 | 10 | 8  | 7  | 6  | 4  |
| 54%  | 49  | 42  | 34  | 28 | 23 | 20 | 17 | 14 | 11 | 9  | 7  | 6  | 4  |
| 55%  | 50  | 43  | 35  | 29 | 23 | 20 | 17 | 14 | 11 | 9  | 7  | 6  | 5  |
| 56%  | 52  | 45  | 36  | 30 | 24 | 21 | 18 | 14 | 11 | 9  | 7  | 6  | 5  |
| 57%  | 54  | 46  | 37  | 30 | 25 | 21 | 18 | 15 | 12 | 9  | 8  | 6  | 5  |
| 58%  | 55  | 47  | 38  | 31 | 25 | 22 | 19 | 15 | 12 | 10 | 8  | 7  | 5  |
| 59%  | 57  | 49  | 39  | 32 | 26 | 22 | 19 | 16 | 12 | 10 | 8  | 7  | 5  |
| 60%  | 59  | 50  | 40  | 33 | 27 | 23 | 20 | 16 | 12 | 10 | 8  | 7  | 5  |
| 61%  | 61  | 52  | 41  | 34 | 27 | 24 | 20 | 16 | 13 | 10 | 8  | 7  | 5  |
| 62%  | 63  | 53  | 43  | 35 | 28 | 24 | 21 | 17 | 13 | 11 | 9  | 7  | 5  |
| 63%  | 64  | 55  | 44  | 36 | 29 | 25 | 21 | 17 | 13 | 11 | 9  | 7  | 6  |
| 64%  | 66  | 56  | 45  | 36 | 29 | 25 | 22 | 18 | 14 | 11 | 9  | 8  | 6  |
| 65%  | 69  | 58  | 46  | 37 | 30 | 26 | 22 | 18 | 14 | 11 | 9  | 8  | 6  |
| 66%  | 71  | 59  | 47  | 38 | 31 | 27 | 23 | 18 | 14 | 12 | 9  | 8  | 6  |
| 67%  | 73  | 61  | 49  | 39 | 32 | 27 | 23 | 19 | 15 | 12 | 10 | 8  | 6  |
| 68%  | 75  | 63  | 50  | 40 | 32 | 28 | 24 | 19 | 15 | 12 | 10 | 8  | 6  |
| 69%  | 77  | 65  | 51  | 41 | 33 | 29 | 24 | 20 | 15 | 13 | 10 | 9  | 7  |
| 70%  | 80  | 67  | 53  | 42 | 34 | 29 | 25 | 20 | 16 | 13 | 10 | 9  | 7  |
| 71%  | 82  | 68  | 54  | 43 | 35 | 30 | 26 | 21 | 16 | 13 | 11 | 9  | 7  |
| 72%  | 85  | 70  | 55  | 45 | 36 | 31 | 26 | 21 | 17 | 13 | 11 | 9  | 7  |
| 73%  | 88  | 72  | 57  | 46 | 36 | 31 | 27 | 22 | 17 | 14 | 11 | 9  | 7  |
| 74%  | 90  | 75  | 58  | 47 | 37 | 32 | 27 | 22 | 17 | 14 | 11 | 10 | 7  |
| 75%  | 93  | 77  | 60  | 48 | 38 | 33 | 28 | 23 | 18 | 14 | 12 | 10 | 8  |
| 76%  | 96  | 79  | 62  | 49 | 39 | 33 | 29 | 23 | 18 | 15 | 12 | 10 | 8  |
| 77%  | 99  | 81  | 63  | 50 | 40 | 34 | 29 | 24 | 19 | 15 | 12 | 10 | 8  |
| 78%  | 102 | 84  | 65  | 52 | 41 | 35 | 30 | 24 | 19 | 15 | 13 | 11 | 8  |
| 79%  | 106 | 86  | 67  | 53 | 42 | 36 | 31 | 25 | 20 | 16 | 13 | 11 | 8  |
| 80%  | 109 | 89  | 68  | 54 | 43 | 37 | 32 | 26 | 20 | 16 | 13 | 11 | 8  |
| 81%  | 113 | 92  | 70  | 56 | 44 | 38 | 32 | 26 | 20 | 17 | 13 | 11 | 9  |
| 82%  | 117 | 94  | 72  | 57 | 45 | 38 | 33 | 27 | 21 | 17 | 14 | 12 | 9  |
| 83%  | 121 | 97  | 74  | 59 | 46 | 39 | 34 | 27 | 21 | 17 | 14 | 12 | 9  |
| 84%  | 125 | 100 | 76  | 60 | 47 | 40 | 35 | 28 | 22 | 18 | 14 | 12 | 9  |
| 85%  | 129 | 103 | 78  | 62 | 49 | 41 | 36 | 29 | 22 | 18 | 15 | 12 | 10 |
| 86%  | 134 | 107 | 81  | 63 | 50 | 42 | 36 | 29 | 23 | 19 | 15 | 13 | 10 |
| 87%  | 139 | 110 | 83  | 65 | 51 | 43 | 37 | 30 | 24 | 19 | 16 | 13 | 10 |
| 88%  | 144 | 114 | 85  | 67 | 52 | 44 | 38 | 31 | 24 | 20 | 16 | 13 | 10 |
| 89%  | 149 | 118 | 88  | 68 | 54 | 45 | 39 | 32 | 25 | 20 | 16 | 14 | 11 |
| 90%  | 155 | 121 | 90  | 70 | 55 | 46 | 40 | 32 | 25 | 21 | 17 | 14 | 11 |
| 91%  | 161 | 126 | 93  | 72 | 56 | 47 | 41 | 33 | 26 | 21 | 17 | 14 | 11 |
| 92%  | 168 | 130 | 96  | 74 | 58 | 49 | 42 | 34 | 27 | 22 | 18 | 15 | 11 |
| 93%  | 175 | 135 | 99  | 76 | 59 | 50 | 43 | 35 | 27 | 22 | 18 | 15 | 12 |
| 94%  | 182 | 140 | 102 | 78 | 61 | 51 | 44 | 36 | 28 | 23 | 18 | 15 | 12 |
| 95%  | 190 | 145 | 105 | 81 | 63 | 52 | 45 | 37 | 29 | 23 | 19 | 16 | 12 |
| 96%  | 199 | 151 | 109 | 83 | 64 | 54 | 47 | 37 | 29 | 24 | 19 | 16 | 13 |
| 97%  | 209 | 157 | 112 | 86 | 66 | 55 | 48 | 38 | 30 | 24 | 20 | 17 | 13 |
| 98%  | 219 | 163 | 116 | 88 | 68 | 56 | 49 | 39 | 31 | 25 | 20 | 17 | 13 |
| 99%  | 231 | 170 | 120 | 91 | 70 | 58 | 50 | 40 | 32 | 26 | 21 | 18 | 14 |
| 100% | 244 | 178 | 125 | 94 | 72 | 59 | 52 | 42 | 33 | 26 | 22 | 18 | 14 |

**Supplementary Table S7.** Differences between AMs' consumption levels calculated by means of novel pediatric-adjusted methodology vs conventional ATC/DDD methodology for aminoglycosides (base case), %

| Share /<br>Age<br>group | 1-11<br>month | 1<br>year | 2<br>years | 3<br>years | 4<br>years | 5<br>years | 6<br>years | 7<br>years | 8<br>years | 9<br>years | 10<br>years | 11<br>years | 12<br>years |
|-------------------------|---------------|-----------|------------|------------|------------|------------|------------|------------|------------|------------|-------------|-------------|-------------|
| 1%                      | 1             | 1         | 1          | 1          | 1          | 1          | 1          | 0          | 0          | 0          | 0           | 0           | 0           |
| 2%                      | 2             | 2         | 2          | 1          | 1          | 1          | 1          | 1          | 1          | 1          | 1           | 1           | 0           |
| 3%                      | 3             | 3         | 2          | 2          | 2          | 2          | 2          | 2          | 1          | 1          | 1           | 1           | 1           |
| 4%                      | 3             | 3         | 3          | 3          | 3          | 3          | 2          | 2          | 2          | 2          | 1           | 1           | 1           |
| 5%                      | 5             | 4         | 4          | 4          | 3          | 3          | 3          | 3          | 2          | 2          | 2           | 1           | 1           |
| 6%                      | 5             | 5         | 5          | 5          | 4          | 4          | 4          | 3          | 3          | 3          | 2           | 2           | 1           |
| 7%                      | 6             | 6         | 6          | 5          | 5          | 5          | 4          | 4          | 3          | 3          | 2           | 2           | 1           |
| 8%                      | 7             | 7         | 6          | 6          | 6          | 5          | 5          | 5          | 4          | 3          | 3           | 2           | 1           |
| 9%                      | 8             | 8         | 7          | 7          | 6          | 6          | 6          | 5          | 5          | 4          | 3           | 3           | 2           |
| 10%                     | 9             | 9         | 8          | 8          | 7          | 7          | 6          | 6          | 5          | 4          | 4           | 3           | 2           |
| 11%                     | 10            | 10        | 9          | 8          | 8          | 7          | 7          | 6          | 6          | 5          | 4           | 3           | 2           |
| 12%                     | 11            | 11        | 10         | 9          | 9          | 8          | 8          | 7          | 6          | 5          | 5           | 3           | 2           |
| 13%                     | 13            | 12        | 11         | 10         | 10         | 9          | 8          | 7          | 7          | 6          | 5           | 4           | 2           |
| 14%                     | 14            | 13        | 12         | 11         | 10         | 10         | 9          | 8          | 7          | 6          | 5           | 4           | 3           |
| 15%                     | 15            | 14        | 13         | 12         | 11         | 10         | 10         | 9          | 8          | 7          | 6           | 4           | 3           |
| 16%                     | 16            | 15        | 14         | 13         | 12         | 11         | 10         | 9          | 8          | 7          | 6           | 5           | 3           |
| 17%                     | 17            | 16        | 15         | 14         | 13         | 12         | 11         | 10         | 9          | 8          | 7           | 5           | 3           |
| 18%                     | 18            | 17        | 16         | 15         | 14         | 13         | 12         | 11         | 10         | 8          | 7           | 5           | 3           |
| 19%                     | 19            | 18        | 17         | 16         | 15         | 14         | 13         | 11         | 10         | 9          | 7           | 6           | 4           |
| 20%                     | 21            | 19        | 18         | 17         | 15         | 14         | 13         | 12         | 11         | 9          | 8           | 6           | 4           |
| 21%                     | 22            | 21        | 19         | 18         | 16         | 15         | 14         | 13         | 11         | 10         | 8           | 6           | 4           |
| 22%                     | 23            | 22        | 20         | 19         | 17         | 16         | 15         | 13         | 12         | 10         | 9           | 7           | 4           |
| 23%                     | 24            | 23        | 21         | 20         | 18         | 17         | 16         | 14         | 13         | 11         | 9           | 7           | 5           |
| 24%                     | 26            | 24        | 22         | 21         | 19         | 18         | 16         | 15         | 13         | 11         | 9           | 7           | 5           |
| 25%                     | 27            | 26        | 23         | 22         | 20         | 19         | 17         | 16         | 14         | 12         | 10          | 8           | 5           |
| 26%                     | 28            | 27        | 25         | 23         | 21         | 20         | 18         | 16         | 14         | 13         | 10          | 8           | 5           |
| 27%                     | 30            | 28        | 26         | 24         | 22         | 20         | 19         | 17         | 15         | 13         | 11          | 8           | 5           |
| 28%                     | 31            | 29        | 27         | 25         | 23         | 21         | 20         | 18         | 16         | 14         | 11          | 8           | 6           |
| 29%                     | 33            | 31        | 28         | 26         | 24         | 22         | 20         | 19         | 16         | 14         | 12          | 9           | 6           |
| 30%                     | 34            | 32        | 29         | 27         | 25         | 23         | 21         | 19         | 17         | 15         | 12          | 9           | 6           |
| 31%                     | 36            | 34        | 31         | 28         | 26         | 24         | 22         | 20         | 18         | 15         | 12          | 9           | 6           |
| 32%                     | 37            | 35        | 32         | 30         | 27         | 25         | 23         | 21         | 18         | 16         | 13          | 10          | 6           |
| 33%                     | 39            | 37        | 33         | 31         | 28         | 26         | 24         | 22         | 19         | 16         | 13          | 10          | 7           |
| 34%                     | 41            | 38        | 35         | 32         | 29         | 27         | 25         | 22         | 20         | 17         | 14          | 10          | 7           |
| 35%                     | 43            | 40        | 36         | 33         | 31         | 28         | 26         | 23         | 21         | 17         | 14          | 11          | 7           |
| 36%                     | 44            | 41        | 38         | 35         | 32         | 29         | 27         | 24         | 21         | 18         | 15          | 11          | 7           |
| 37%                     | 46            | 43        | 39         | 36         | 33         | 30         | 28         | 25         | 22         | 19         | 15          | 12          | 7           |
| 38%                     | 48            | 45        | 41         | 37         | 34         | 31         | 29         | 26         | 23         | 19         | 16          | 12          | 8           |
| 39%                     | 50            | 46        | 42         | 38         | 35         | 33         | 30         | 27         | 23         | 20         | 16          | 12          | 8           |
| 40%                     | 52            | 48        | 44         | 40         | 37         | 34         | 31         | 28         | 24         | 21         | 17          | 13          | 8           |
| 41%                     | 54            | 50        | 45         | 41         | 38         | 35         | 31         | 28         | 25         | 21         | 17          | 13          | 8           |
| 42%                     | 56            | 52        | 47         | 43         | 39         | 36         | 33         | 29         | 26         | 22         | 18          | 13          | 8           |
| 43%                     | 58            | 54        | 48         | 44         | 40         | 37         | 34         | 30         | 26         | 22         | 18          | 14          | 9           |
| 44%                     | 60            | 56        | 50         | 46         | 42         | 38         | 35         | 31         | 27         | 23         | 19          | 14          | 9           |
| 45%                     | 62            | 58        | 52         | 47         | 43         | 39         | 36         | 32         | 28         | 24         | 19          | 14          | 9           |
| 46%                     | 65            | 60        | 54         | 49         | 45         | 41         | 37         | 33         | 29         | 24         | 20          | 15          | 9           |
| 47%                     | 67            | 62        | 55         | 50         | 46         | 42         | 38         | 34         | 30         | 25         | 20          | 15          | 9           |

|      |     |     |     |     |     |     |     |     |    |    |    |    |    |
|------|-----|-----|-----|-----|-----|-----|-----|-----|----|----|----|----|----|
| 48%  | 69  | 64  | 57  | 52  | 47  | 43  | 39  | 35  | 30 | 26 | 21 | 15 | 10 |
| 49%  | 72  | 66  | 59  | 54  | 49  | 44  | 40  | 36  | 31 | 26 | 21 | 16 | 10 |
| 50%  | 74  | 68  | 61  | 56  | 50  | 46  | 41  | 37  | 32 | 27 | 22 | 16 | 10 |
| 51%  | 77  | 71  | 63  | 57  | 52  | 47  | 43  | 38  | 33 | 28 | 22 | 17 | 10 |
| 52%  | 80  | 73  | 65  | 59  | 53  | 49  | 44  | 39  | 34 | 29 | 23 | 17 | 11 |
| 53%  | 82  | 76  | 67  | 61  | 55  | 50  | 45  | 40  | 35 | 29 | 23 | 17 | 11 |
| 54%  | 85  | 78  | 69  | 63  | 57  | 51  | 46  | 41  | 36 | 30 | 24 | 18 | 11 |
| 55%  | 88  | 81  | 72  | 65  | 58  | 53  | 48  | 42  | 37 | 31 | 24 | 18 | 11 |
| 56%  | 91  | 83  | 74  | 67  | 60  | 54  | 49  | 43  | 37 | 31 | 25 | 19 | 12 |
| 57%  | 94  | 86  | 76  | 69  | 62  | 56  | 50  | 44  | 38 | 32 | 26 | 19 | 12 |
| 58%  | 98  | 89  | 79  | 71  | 64  | 57  | 51  | 46  | 39 | 33 | 26 | 19 | 12 |
| 59%  | 101 | 92  | 81  | 73  | 65  | 59  | 53  | 47  | 40 | 34 | 27 | 20 | 12 |
| 60%  | 105 | 95  | 84  | 75  | 67  | 61  | 54  | 48  | 41 | 34 | 27 | 20 | 13 |
| 61%  | 108 | 98  | 86  | 77  | 69  | 62  | 56  | 49  | 42 | 35 | 28 | 21 | 13 |
| 62%  | 112 | 101 | 89  | 79  | 71  | 64  | 57  | 50  | 43 | 36 | 28 | 21 | 13 |
| 63%  | 116 | 105 | 92  | 82  | 73  | 66  | 58  | 51  | 44 | 37 | 29 | 21 | 13 |
| 64%  | 120 | 108 | 95  | 84  | 75  | 67  | 60  | 53  | 45 | 38 | 30 | 22 | 13 |
| 65%  | 124 | 112 | 97  | 87  | 77  | 69  | 61  | 54  | 46 | 38 | 30 | 22 | 14 |
| 66%  | 129 | 116 | 100 | 89  | 79  | 71  | 63  | 55  | 47 | 39 | 31 | 23 | 14 |
| 67%  | 133 | 119 | 103 | 92  | 81  | 73  | 64  | 57  | 48 | 40 | 31 | 23 | 14 |
| 68%  | 138 | 123 | 107 | 94  | 84  | 75  | 66  | 58  | 50 | 41 | 32 | 23 | 14 |
| 69%  | 143 | 127 | 110 | 97  | 86  | 77  | 68  | 59  | 51 | 42 | 33 | 24 | 15 |
| 70%  | 148 | 132 | 113 | 100 | 88  | 79  | 69  | 61  | 52 | 43 | 33 | 24 | 15 |
| 71%  | 153 | 136 | 117 | 103 | 91  | 81  | 71  | 62  | 53 | 43 | 34 | 25 | 15 |
| 72%  | 159 | 141 | 121 | 106 | 93  | 83  | 73  | 63  | 54 | 44 | 35 | 25 | 15 |
| 73%  | 165 | 146 | 124 | 109 | 96  | 85  | 75  | 65  | 55 | 45 | 35 | 26 | 16 |
| 74%  | 171 | 151 | 128 | 112 | 98  | 87  | 76  | 66  | 56 | 46 | 36 | 26 | 16 |
| 75%  | 177 | 156 | 132 | 115 | 101 | 89  | 78  | 68  | 58 | 47 | 37 | 27 | 16 |
| 76%  | 184 | 161 | 136 | 119 | 104 | 92  | 80  | 70  | 59 | 48 | 37 | 27 | 16 |
| 77%  | 191 | 167 | 141 | 122 | 107 | 94  | 82  | 71  | 60 | 49 | 38 | 27 | 17 |
| 78%  | 198 | 173 | 145 | 126 | 110 | 96  | 84  | 73  | 61 | 50 | 39 | 28 | 17 |
| 79%  | 206 | 179 | 150 | 129 | 113 | 99  | 86  | 74  | 63 | 51 | 39 | 28 | 17 |
| 80%  | 214 | 185 | 155 | 133 | 116 | 101 | 88  | 76  | 64 | 52 | 40 | 29 | 17 |
| 81%  | 223 | 192 | 160 | 137 | 119 | 104 | 90  | 78  | 65 | 53 | 41 | 29 | 18 |
| 82%  | 232 | 199 | 165 | 141 | 122 | 107 | 92  | 79  | 67 | 54 | 41 | 30 | 18 |
| 83%  | 242 | 207 | 170 | 145 | 125 | 109 | 94  | 81  | 68 | 55 | 42 | 30 | 18 |
| 84%  | 252 | 215 | 176 | 150 | 129 | 112 | 97  | 83  | 69 | 56 | 43 | 31 | 19 |
| 85%  | 263 | 223 | 182 | 154 | 132 | 115 | 99  | 85  | 71 | 57 | 44 | 31 | 19 |
| 86%  | 274 | 232 | 188 | 159 | 136 | 118 | 101 | 87  | 72 | 58 | 44 | 32 | 19 |
| 87%  | 287 | 241 | 195 | 164 | 140 | 121 | 104 | 88  | 73 | 59 | 45 | 32 | 19 |
| 88%  | 300 | 251 | 201 | 169 | 144 | 124 | 106 | 90  | 75 | 60 | 46 | 33 | 20 |
| 89%  | 314 | 261 | 208 | 174 | 148 | 127 | 109 | 92  | 77 | 61 | 47 | 33 | 20 |
| 90%  | 329 | 272 | 216 | 180 | 152 | 130 | 111 | 94  | 78 | 62 | 47 | 34 | 20 |
| 91%  | 346 | 283 | 223 | 185 | 156 | 134 | 114 | 96  | 80 | 63 | 48 | 34 | 20 |
| 92%  | 363 | 296 | 232 | 191 | 161 | 137 | 117 | 99  | 81 | 65 | 49 | 35 | 21 |
| 93%  | 382 | 309 | 240 | 198 | 165 | 141 | 119 | 101 | 83 | 66 | 50 | 35 | 21 |
| 94%  | 403 | 323 | 249 | 204 | 170 | 145 | 122 | 103 | 84 | 67 | 51 | 36 | 21 |
| 95%  | 425 | 338 | 259 | 211 | 175 | 149 | 125 | 105 | 86 | 68 | 51 | 36 | 21 |
| 96%  | 450 | 354 | 269 | 218 | 180 | 152 | 128 | 107 | 88 | 69 | 52 | 37 | 22 |
| 97%  | 477 | 371 | 279 | 225 | 186 | 157 | 131 | 110 | 90 | 71 | 53 | 37 | 22 |
| 98%  | 507 | 390 | 291 | 233 | 192 | 161 | 135 | 112 | 91 | 72 | 54 | 38 | 22 |
| 99%  | 540 | 410 | 303 | 241 | 197 | 165 | 138 | 115 | 93 | 73 | 55 | 38 | 22 |
| 100% | 577 | 433 | 315 | 250 | 203 | 170 | 141 | 117 | 95 | 74 | 56 | 39 | 23 |



**Supplementary Table S8.** Differences between AMs' consumption levels calculated by means of novel pediatric-adjusted methodology vs conventional ATC/DDD methodology for penicillins (base case), %

| Share /<br>Age<br>group | 1-11<br>month | 1<br>year | 2<br>years | 3<br>years | 4<br>years | 5<br>years | 6<br>years | 7<br>years | 8<br>years | 9<br>years | 10<br>years | 11<br>years | 12<br>years |
|-------------------------|---------------|-----------|------------|------------|------------|------------|------------|------------|------------|------------|-------------|-------------|-------------|
| 1%                      | 1             | 1         | 1          | 0          | 0          | 0          | 0          | 0          | 0          | 0          | 0           | 0           | 0           |
| 2%                      | 2             | 1         | 1          | 1          | 1          | 1          | 0          | 0          | 0          | 0          | 0           | 0           | 0           |
| 3%                      | 2             | 2         | 2          | 1          | 1          | 1          | 1          | 0          | 0          | 0          | 0           | 0           | 0           |
| 4%                      | 3             | 3         | 2          | 2          | 2          | 1          | 1          | 1          | 0          | 0          | 0           | 0           | 0           |
| 5%                      | 4             | 3         | 3          | 2          | 2          | 2          | 1          | 1          | 0          | 0          | 0           | 0           | 0           |
| 6%                      | 5             | 4         | 3          | 3          | 2          | 2          | 1          | 1          | 0          | 0          | 0           | 0           | 0           |
| 7%                      | 5             | 5         | 4          | 3          | 3          | 2          | 2          | 1          | 0          | 0          | 0           | 0           | 0           |
| 8%                      | 6             | 5         | 5          | 4          | 3          | 3          | 2          | 1          | 0          | 0          | 0           | 0           | 0           |
| 9%                      | 7             | 6         | 5          | 4          | 4          | 3          | 2          | 1          | 0          | 0          | 0           | 0           | 0           |
| 10%                     | 8             | 7         | 6          | 5          | 4          | 3          | 2          | 1          | 1          | 0          | 0           | 0           | 0           |
| 11%                     | 9             | 8         | 6          | 5          | 4          | 3          | 3          | 2          | 1          | 0          | 0           | 0           | 0           |
| 12%                     | 9             | 8         | 7          | 6          | 5          | 4          | 3          | 2          | 1          | 0          | 0           | 0           | 0           |
| 13%                     | 10            | 9         | 8          | 6          | 5          | 4          | 3          | 2          | 1          | 0          | 0           | 0           | 0           |
| 14%                     | 11            | 10        | 8          | 7          | 6          | 5          | 3          | 2          | 1          | 0          | 0           | 0           | 0           |
| 15%                     | 12            | 11        | 9          | 7          | 6          | 5          | 4          | 2          | 1          | 0          | 0           | 0           | 0           |
| 16%                     | 13            | 12        | 10         | 8          | 7          | 5          | 4          | 2          | 1          | 0          | 0           | 0           | 0           |
| 17%                     | 14            | 12        | 10         | 9          | 7          | 6          | 4          | 2          | 1          | 0          | 0           | 0           | 0           |
| 18%                     | 15            | 13        | 11         | 9          | 7          | 6          | 4          | 3          | 1          | 0          | 0           | 0           | 0           |
| 19%                     | 16            | 14        | 12         | 10         | 8          | 6          | 5          | 3          | 1          | 0          | 0           | 0           | 0           |
| 20%                     | 17            | 15        | 12         | 10         | 8          | 7          | 5          | 3          | 1          | 0          | 0           | 0           | 0           |
| 21%                     | 18            | 16        | 13         | 11         | 9          | 7          | 5          | 3          | 1          | 0          | 0           | 0           | 0           |
| 22%                     | 19            | 17        | 14         | 11         | 9          | 7          | 5          | 3          | 1          | 0          | 0           | 0           | 0           |
| 23%                     | 20            | 17        | 14         | 12         | 10         | 8          | 6          | 3          | 1          | 0          | 0           | 0           | 0           |
| 24%                     | 21            | 18        | 15         | 12         | 10         | 8          | 6          | 4          | 1          | 1          | 0           | 0           | 0           |
| 25%                     | 22            | 19        | 16         | 13         | 11         | 8          | 6          | 4          | 1          | 1          | 0           | 0           | 0           |
| 26%                     | 23            | 20        | 17         | 14         | 11         | 9          | 6          | 4          | 1          | 1          | 0           | 0           | 0           |
| 27%                     | 24            | 21        | 17         | 14         | 12         | 9          | 7          | 4          | 1          | 1          | 0           | 0           | 0           |
| 28%                     | 25            | 22        | 18         | 15         | 12         | 9          | 7          | 4          | 1          | 1          | 0           | 0           | 0           |
| 29%                     | 26            | 23        | 19         | 15         | 13         | 10         | 7          | 4          | 1          | 1          | 0           | 0           | 0           |
| 30%                     | 28            | 24        | 20         | 16         | 13         | 10         | 7          | 4          | 2          | 1          | 0           | 0           | 0           |
| 31%                     | 29            | 25        | 20         | 17         | 13         | 11         | 8          | 5          | 2          | 1          | 0           | 0           | 0           |
| 32%                     | 30            | 26        | 21         | 17         | 14         | 11         | 8          | 5          | 2          | 1          | 0           | 0           | 0           |
| 33%                     | 31            | 27        | 22         | 18         | 14         | 11         | 8          | 5          | 2          | 1          | 0           | 0           | 0           |
| 34%                     | 32            | 28        | 23         | 19         | 15         | 12         | 8          | 5          | 2          | 1          | 0           | 0           | 0           |
| 35%                     | 34            | 29        | 24         | 19         | 16         | 12         | 9          | 5          | 2          | 1          | 0           | 0           | 0           |
| 36%                     | 35            | 30        | 25         | 20         | 16         | 12         | 9          | 5          | 2          | 1          | 0           | 0           | 0           |
| 37%                     | 36            | 31        | 25         | 21         | 17         | 13         | 9          | 6          | 2          | 1          | 0           | 0           | 0           |
| 38%                     | 38            | 33        | 26         | 21         | 17         | 13         | 9          | 6          | 2          | 1          | 0           | 0           | 0           |
| 39%                     | 39            | 34        | 27         | 22         | 18         | 14         | 10         | 6          | 2          | 1          | 0           | 0           | 0           |
| 40%                     | 41            | 35        | 28         | 23         | 18         | 14         | 10         | 6          | 2          | 1          | 0           | 0           | 0           |
| 41%                     | 42            | 36        | 29         | 23         | 19         | 14         | 10         | 6          | 2          | 1          | 0           | 0           | 0           |
| 42%                     | 43            | 37        | 30         | 24         | 19         | 15         | 11         | 6          | 2          | 1          | 0           | 0           | 0           |
| 43%                     | 45            | 39        | 31         | 25         | 20         | 15         | 11         | 7          | 2          | 1          | 0           | 0           | 0           |
| 44%                     | 46            | 40        | 32         | 26         | 20         | 16         | 11         | 7          | 2          | 1          | 0           | 0           | 0           |
| 45%                     | 48            | 41        | 33         | 26         | 21         | 16         | 11         | 7          | 2          | 1          | 0           | 0           | 0           |
| 46%                     | 50            | 42        | 34         | 27         | 21         | 16         | 12         | 7          | 2          | 1          | 0           | 0           | 0           |
| 47%                     | 51            | 44        | 35         | 28         | 22         | 17         | 12         | 7          | 3          | 1          | 0           | 0           | 0           |



|      |     |     |     |    |    |    |    |    |   |   |   |   |   |
|------|-----|-----|-----|----|----|----|----|----|---|---|---|---|---|
| 48%  | 53  | 45  | 36  | 29 | 23 | 17 | 12 | 7  | 3 | 1 | 0 | 0 | 0 |
| 49%  | 55  | 46  | 37  | 29 | 23 | 18 | 13 | 8  | 3 | 1 | 0 | 0 | 0 |
| 50%  | 56  | 48  | 38  | 30 | 24 | 18 | 13 | 8  | 3 | 1 | 0 | 0 | 0 |
| 51%  | 58  | 49  | 39  | 31 | 24 | 19 | 13 | 8  | 3 | 1 | 0 | 0 | 0 |
| 52%  | 60  | 51  | 40  | 32 | 25 | 19 | 14 | 8  | 3 | 1 | 0 | 0 | 0 |
| 53%  | 62  | 52  | 41  | 33 | 26 | 19 | 14 | 8  | 3 | 1 | 0 | 0 | 0 |
| 54%  | 64  | 54  | 42  | 33 | 26 | 20 | 14 | 8  | 3 | 1 | 0 | 0 | 0 |
| 55%  | 66  | 55  | 43  | 34 | 27 | 20 | 14 | 9  | 3 | 1 | 0 | 0 | 0 |
| 56%  | 68  | 57  | 44  | 35 | 27 | 21 | 15 | 9  | 3 | 1 | 0 | 0 | 0 |
| 57%  | 70  | 58  | 45  | 36 | 28 | 21 | 15 | 9  | 3 | 1 | 0 | 0 | 0 |
| 58%  | 72  | 60  | 47  | 37 | 29 | 22 | 15 | 9  | 3 | 1 | 0 | 0 | 0 |
| 59%  | 74  | 62  | 48  | 38 | 29 | 22 | 16 | 9  | 3 | 1 | 0 | 0 | 0 |
| 60%  | 76  | 63  | 49  | 39 | 30 | 23 | 16 | 9  | 3 | 1 | 0 | 0 | 0 |
| 61%  | 78  | 65  | 50  | 39 | 31 | 23 | 16 | 10 | 3 | 1 | 0 | 0 | 0 |
| 62%  | 81  | 67  | 52  | 40 | 31 | 24 | 17 | 10 | 3 | 1 | 0 | 0 | 0 |
| 63%  | 83  | 69  | 53  | 41 | 32 | 24 | 17 | 10 | 4 | 1 | 0 | 0 | 0 |
| 64%  | 86  | 71  | 54  | 42 | 33 | 25 | 17 | 10 | 4 | 1 | 0 | 0 | 0 |
| 65%  | 88  | 73  | 55  | 43 | 33 | 25 | 18 | 10 | 4 | 1 | 0 | 0 | 0 |
| 66%  | 91  | 75  | 57  | 44 | 34 | 26 | 18 | 11 | 4 | 1 | 0 | 0 | 0 |
| 67%  | 93  | 77  | 58  | 45 | 35 | 26 | 18 | 11 | 4 | 1 | 0 | 0 | 0 |
| 68%  | 96  | 79  | 60  | 46 | 36 | 27 | 19 | 11 | 4 | 2 | 0 | 0 | 0 |
| 69%  | 99  | 81  | 61  | 47 | 36 | 27 | 19 | 11 | 4 | 2 | 0 | 0 | 0 |
| 70%  | 102 | 83  | 62  | 48 | 37 | 28 | 19 | 11 | 4 | 2 | 0 | 0 | 0 |
| 71%  | 105 | 85  | 64  | 49 | 38 | 28 | 20 | 11 | 4 | 2 | 0 | 0 | 0 |
| 72%  | 108 | 87  | 65  | 50 | 39 | 29 | 20 | 12 | 4 | 2 | 0 | 0 | 0 |
| 73%  | 111 | 90  | 67  | 51 | 39 | 29 | 20 | 12 | 4 | 2 | 0 | 0 | 0 |
| 74%  | 114 | 92  | 69  | 52 | 40 | 30 | 21 | 12 | 4 | 2 | 0 | 0 | 0 |
| 75%  | 118 | 94  | 70  | 54 | 41 | 30 | 21 | 12 | 4 | 2 | 0 | 0 | 0 |
| 76%  | 121 | 97  | 72  | 55 | 42 | 31 | 21 | 12 | 4 | 2 | 0 | 0 | 0 |
| 77%  | 125 | 100 | 73  | 56 | 42 | 31 | 22 | 13 | 4 | 2 | 0 | 0 | 0 |
| 78%  | 129 | 102 | 75  | 57 | 43 | 32 | 22 | 13 | 4 | 2 | 0 | 0 | 0 |
| 79%  | 132 | 105 | 77  | 58 | 44 | 32 | 22 | 13 | 5 | 2 | 0 | 0 | 0 |
| 80%  | 137 | 108 | 79  | 59 | 45 | 33 | 23 | 13 | 5 | 2 | 0 | 0 | 0 |
| 81%  | 141 | 110 | 80  | 61 | 46 | 34 | 23 | 13 | 5 | 2 | 0 | 0 | 0 |
| 82%  | 145 | 113 | 82  | 62 | 46 | 34 | 23 | 14 | 5 | 2 | 0 | 0 | 0 |
| 83%  | 149 | 116 | 84  | 63 | 47 | 35 | 24 | 14 | 5 | 2 | 0 | 0 | 0 |
| 84%  | 154 | 119 | 86  | 64 | 48 | 35 | 24 | 14 | 5 | 2 | 0 | 0 | 0 |
| 85%  | 159 | 123 | 88  | 66 | 49 | 36 | 25 | 14 | 5 | 2 | 0 | 0 | 0 |
| 86%  | 164 | 126 | 90  | 67 | 50 | 36 | 25 | 14 | 5 | 2 | 0 | 0 | 0 |
| 87%  | 169 | 129 | 92  | 68 | 51 | 37 | 25 | 15 | 5 | 2 | 0 | 0 | 0 |
| 88%  | 174 | 133 | 94  | 70 | 52 | 38 | 26 | 15 | 5 | 2 | 0 | 0 | 0 |
| 89%  | 180 | 136 | 96  | 71 | 53 | 38 | 26 | 15 | 5 | 2 | 0 | 0 | 0 |
| 90%  | 186 | 140 | 98  | 72 | 54 | 39 | 26 | 15 | 5 | 2 | 0 | 0 | 0 |
| 91%  | 192 | 144 | 101 | 74 | 55 | 39 | 27 | 15 | 5 | 2 | 0 | 0 | 0 |
| 92%  | 198 | 148 | 103 | 75 | 55 | 40 | 27 | 16 | 5 | 2 | 0 | 0 | 0 |
| 93%  | 204 | 152 | 105 | 77 | 56 | 41 | 28 | 16 | 6 | 2 | 0 | 0 | 0 |
| 94%  | 211 | 156 | 108 | 78 | 57 | 41 | 28 | 16 | 6 | 2 | 0 | 0 | 0 |
| 95%  | 219 | 161 | 110 | 80 | 58 | 42 | 28 | 16 | 6 | 2 | 0 | 0 | 0 |
| 96%  | 226 | 165 | 113 | 81 | 59 | 43 | 29 | 16 | 6 | 2 | 0 | 0 | 0 |
| 97%  | 234 | 170 | 115 | 83 | 60 | 43 | 29 | 17 | 6 | 2 | 0 | 0 | 0 |
| 98%  | 243 | 175 | 118 | 85 | 61 | 44 | 30 | 17 | 6 | 2 | 0 | 0 | 0 |
| 99%  | 251 | 180 | 121 | 86 | 63 | 45 | 30 | 17 | 6 | 2 | 0 | 0 | 0 |
| 100% | 261 | 185 | 123 | 88 | 64 | 45 | 30 | 17 | 6 | 2 | 0 | 0 | 0 |

**Supplementary Table S9.** Differences between AMs' consumption levels calculated by means of novel pediatric-adjusted methodology vs conventional ATC/DDD methodology for cephalosporins (base case), %

| Share /<br>Age<br>group | 1-11<br>month | 1<br>year | 2<br>years | 3<br>years | 4<br>years | 5<br>years | 6<br>years | 7<br>years | 8<br>years | 9<br>years | 10<br>years | 11<br>years | 12<br>years |
|-------------------------|---------------|-----------|------------|------------|------------|------------|------------|------------|------------|------------|-------------|-------------|-------------|
| 1%                      | 1             | 1         | 0          | 0          | 0          | 0          | 0          | 0          | 0          | 0          | 0           | 0           | 0           |
| 2%                      | 1             | 1         | 1          | 1          | 1          | 0          | 0          | 0          | 0          | 0          | 0           | 0           | 0           |
| 3%                      | 2             | 2         | 2          | 1          | 1          | 1          | 0          | 0          | 0          | 0          | 0           | 0           | 0           |
| 4%                      | 3             | 2         | 2          | 2          | 1          | 1          | 1          | 0          | 0          | 0          | 0           | 0           | 0           |
| 5%                      | 4             | 3         | 3          | 2          | 2          | 1          | 1          | 1          | 0          | 0          | 0           | 0           | 0           |
| 6%                      | 4             | 4         | 3          | 2          | 2          | 1          | 1          | 1          | 1          | 0          | 0           | 0           | 0           |
| 7%                      | 5             | 4         | 4          | 3          | 2          | 2          | 1          | 1          | 1          | 1          | 0           | 0           | 0           |
| 8%                      | 6             | 5         | 4          | 3          | 3          | 2          | 1          | 1          | 1          | 1          | 0           | 0           | 0           |
| 9%                      | 7             | 6         | 5          | 4          | 3          | 2          | 1          | 1          | 1          | 1          | 0           | 0           | 0           |
| 10%                     | 7             | 6         | 5          | 4          | 3          | 2          | 1          | 1          | 1          | 1          | 1           | 0           | 0           |
| 11%                     | 8             | 7         | 6          | 5          | 4          | 3          | 2          | 1          | 1          | 1          | 1           | 0           | 0           |
| 12%                     | 9             | 8         | 6          | 5          | 4          | 3          | 2          | 2          | 1          | 1          | 1           | 0           | 0           |
| 13%                     | 10            | 9         | 7          | 5          | 4          | 3          | 2          | 2          | 1          | 1          | 1           | 1           | 0           |
| 14%                     | 11            | 9         | 7          | 6          | 5          | 3          | 2          | 2          | 1          | 1          | 1           | 1           | 0           |
| 15%                     | 12            | 10        | 8          | 6          | 5          | 3          | 2          | 2          | 2          | 1          | 1           | 1           | 0           |
| 16%                     | 12            | 11        | 9          | 7          | 5          | 4          | 2          | 2          | 2          | 1          | 1           | 1           | 0           |
| 17%                     | 13            | 11        | 9          | 7          | 6          | 4          | 3          | 2          | 2          | 1          | 1           | 1           | 0           |
| 18%                     | 14            | 12        | 10         | 8          | 6          | 4          | 3          | 2          | 2          | 1          | 1           | 1           | 0           |
| 19%                     | 15            | 13        | 10         | 8          | 6          | 4          | 3          | 2          | 2          | 1          | 1           | 1           | 0           |
| 20%                     | 16            | 14        | 11         | 9          | 7          | 5          | 3          | 3          | 2          | 2          | 1           | 1           | 0           |
| 21%                     | 17            | 15        | 12         | 9          | 7          | 5          | 3          | 3          | 2          | 2          | 1           | 1           | 0           |
| 22%                     | 18            | 15        | 12         | 10         | 7          | 5          | 3          | 3          | 2          | 2          | 1           | 1           | 0           |
| 23%                     | 19            | 16        | 13         | 10         | 8          | 6          | 4          | 3          | 2          | 2          | 1           | 1           | 0           |
| 24%                     | 20            | 17        | 14         | 11         | 8          | 6          | 4          | 3          | 3          | 2          | 1           | 1           | 0           |
| 25%                     | 21            | 18        | 14         | 11         | 9          | 6          | 4          | 3          | 3          | 2          | 1           | 1           | 0           |
| 26%                     | 22            | 19        | 15         | 12         | 9          | 6          | 4          | 3          | 3          | 2          | 2           | 1           | 1           |
| 27%                     | 23            | 20        | 16         | 12         | 9          | 7          | 4          | 4          | 3          | 2          | 2           | 1           | 1           |
| 28%                     | 24            | 20        | 16         | 13         | 10         | 7          | 5          | 4          | 3          | 2          | 2           | 1           | 1           |
| 29%                     | 25            | 21        | 17         | 13         | 10         | 7          | 5          | 4          | 3          | 2          | 2           | 1           | 1           |
| 30%                     | 26            | 22        | 18         | 14         | 11         | 7          | 5          | 4          | 3          | 2          | 2           | 1           | 1           |
| 31%                     | 27            | 23        | 18         | 14         | 11         | 8          | 5          | 4          | 3          | 2          | 2           | 1           | 1           |
| 32%                     | 28            | 24        | 19         | 15         | 11         | 8          | 5          | 4          | 3          | 3          | 2           | 1           | 1           |
| 33%                     | 29            | 25        | 20         | 15         | 12         | 8          | 5          | 5          | 4          | 3          | 2           | 1           | 1           |
| 34%                     | 31            | 26        | 20         | 16         | 12         | 9          | 6          | 5          | 4          | 3          | 2           | 1           | 1           |
| 35%                     | 32            | 27        | 21         | 17         | 13         | 9          | 6          | 5          | 4          | 3          | 2           | 1           | 1           |
| 36%                     | 33            | 28        | 22         | 17         | 13         | 9          | 6          | 5          | 4          | 3          | 2           | 1           | 1           |
| 37%                     | 34            | 29        | 23         | 18         | 13         | 10         | 6          | 5          | 4          | 3          | 2           | 2           | 1           |
| 38%                     | 36            | 30        | 24         | 18         | 14         | 10         | 6          | 5          | 4          | 3          | 2           | 2           | 1           |
| 39%                     | 37            | 31        | 24         | 19         | 14         | 10         | 7          | 6          | 4          | 3          | 2           | 2           | 1           |
| 40%                     | 38            | 32        | 25         | 20         | 15         | 10         | 7          | 6          | 4          | 3          | 2           | 2           | 1           |
| 41%                     | 40            | 33        | 26         | 20         | 15         | 11         | 7          | 6          | 5          | 3          | 3           | 2           | 1           |
| 42%                     | 41            | 34        | 27         | 21         | 16         | 11         | 7          | 6          | 5          | 4          | 3           | 2           | 1           |
| 43%                     | 42            | 36        | 28         | 21         | 16         | 11         | 8          | 6          | 5          | 4          | 3           | 2           | 1           |
| 44%                     | 44            | 37        | 28         | 22         | 17         | 12         | 8          | 6          | 5          | 4          | 3           | 2           | 1           |
| 45%                     | 45            | 38        | 29         | 23         | 17         | 12         | 8          | 7          | 5          | 4          | 3           | 2           | 1           |
| 46%                     | 47            | 39        | 30         | 23         | 18         | 12         | 8          | 7          | 5          | 4          | 3           | 2           | 1           |
| 47%                     | 48            | 40        | 31         | 24         | 18         | 13         | 8          | 7          | 5          | 4          | 3           | 2           | 1           |

|      |     |     |     |    |    |    |    |    |    |    |   |   |   |
|------|-----|-----|-----|----|----|----|----|----|----|----|---|---|---|
| 48%  | 50  | 42  | 32  | 25 | 19 | 13 | 9  | 7  | 6  | 4  | 3 | 2 | 1 |
| 49%  | 51  | 43  | 33  | 25 | 19 | 14 | 9  | 7  | 6  | 4  | 3 | 2 | 1 |
| 50%  | 53  | 44  | 34  | 26 | 20 | 14 | 9  | 8  | 6  | 4  | 3 | 2 | 1 |
| 51%  | 55  | 45  | 35  | 27 | 20 | 14 | 9  | 8  | 6  | 4  | 3 | 2 | 1 |
| 52%  | 56  | 47  | 36  | 27 | 21 | 15 | 10 | 8  | 6  | 5  | 3 | 2 | 1 |
| 53%  | 58  | 48  | 37  | 28 | 21 | 15 | 10 | 8  | 6  | 5  | 3 | 2 | 1 |
| 54%  | 60  | 49  | 38  | 29 | 22 | 15 | 10 | 8  | 7  | 5  | 3 | 2 | 1 |
| 55%  | 62  | 51  | 39  | 30 | 22 | 16 | 10 | 9  | 7  | 5  | 4 | 2 | 1 |
| 56%  | 64  | 52  | 40  | 30 | 23 | 16 | 11 | 9  | 7  | 5  | 4 | 2 | 1 |
| 57%  | 65  | 54  | 41  | 31 | 23 | 17 | 11 | 9  | 7  | 5  | 4 | 2 | 1 |
| 58%  | 67  | 55  | 42  | 32 | 24 | 17 | 11 | 9  | 7  | 5  | 4 | 3 | 1 |
| 59%  | 69  | 57  | 43  | 33 | 24 | 17 | 12 | 9  | 7  | 5  | 4 | 3 | 1 |
| 60%  | 71  | 58  | 44  | 33 | 25 | 18 | 12 | 10 | 7  | 5  | 4 | 3 | 1 |
| 61%  | 74  | 60  | 45  | 34 | 26 | 18 | 12 | 10 | 8  | 6  | 4 | 3 | 1 |
| 62%  | 76  | 62  | 46  | 35 | 26 | 19 | 12 | 10 | 8  | 6  | 4 | 3 | 1 |
| 63%  | 78  | 63  | 47  | 36 | 27 | 19 | 13 | 10 | 8  | 6  | 4 | 3 | 1 |
| 64%  | 80  | 65  | 49  | 37 | 27 | 19 | 13 | 11 | 8  | 6  | 4 | 3 | 1 |
| 65%  | 83  | 67  | 50  | 38 | 28 | 20 | 13 | 11 | 8  | 6  | 4 | 3 | 1 |
| 66%  | 85  | 69  | 51  | 38 | 29 | 20 | 14 | 11 | 9  | 6  | 4 | 3 | 1 |
| 67%  | 87  | 70  | 52  | 39 | 29 | 21 | 14 | 11 | 9  | 6  | 5 | 3 | 1 |
| 68%  | 90  | 72  | 53  | 40 | 30 | 21 | 14 | 11 | 9  | 6  | 5 | 3 | 1 |
| 69%  | 93  | 74  | 55  | 41 | 31 | 22 | 15 | 12 | 9  | 7  | 5 | 3 | 2 |
| 70%  | 95  | 76  | 56  | 42 | 31 | 22 | 15 | 12 | 9  | 7  | 5 | 3 | 2 |
| 71%  | 98  | 78  | 58  | 43 | 32 | 23 | 15 | 12 | 9  | 7  | 5 | 3 | 2 |
| 72%  | 101 | 80  | 59  | 44 | 33 | 23 | 16 | 13 | 10 | 7  | 5 | 3 | 2 |
| 73%  | 104 | 83  | 60  | 45 | 33 | 24 | 16 | 13 | 10 | 7  | 5 | 3 | 2 |
| 74%  | 107 | 85  | 62  | 46 | 34 | 24 | 16 | 13 | 10 | 7  | 5 | 3 | 2 |
| 75%  | 110 | 87  | 63  | 47 | 35 | 25 | 17 | 13 | 10 | 7  | 5 | 3 | 2 |
| 76%  | 113 | 89  | 65  | 48 | 36 | 25 | 17 | 14 | 10 | 8  | 5 | 4 | 2 |
| 77%  | 117 | 92  | 66  | 49 | 36 | 26 | 17 | 14 | 11 | 8  | 5 | 4 | 2 |
| 78%  | 120 | 94  | 68  | 50 | 37 | 26 | 18 | 14 | 11 | 8  | 6 | 4 | 2 |
| 79%  | 124 | 97  | 70  | 52 | 38 | 27 | 18 | 14 | 11 | 8  | 6 | 4 | 2 |
| 80%  | 128 | 99  | 71  | 53 | 39 | 27 | 18 | 15 | 11 | 8  | 6 | 4 | 2 |
| 81%  | 131 | 102 | 73  | 54 | 40 | 28 | 19 | 15 | 11 | 8  | 6 | 4 | 2 |
| 82%  | 136 | 105 | 75  | 55 | 40 | 28 | 19 | 15 | 12 | 8  | 6 | 4 | 2 |
| 83%  | 140 | 108 | 77  | 56 | 41 | 29 | 20 | 16 | 12 | 9  | 6 | 4 | 2 |
| 84%  | 144 | 111 | 78  | 58 | 42 | 30 | 20 | 16 | 12 | 9  | 6 | 4 | 2 |
| 85%  | 149 | 114 | 80  | 59 | 43 | 30 | 20 | 16 | 12 | 9  | 6 | 4 | 2 |
| 86%  | 153 | 117 | 82  | 60 | 44 | 31 | 21 | 17 | 13 | 9  | 6 | 4 | 2 |
| 87%  | 158 | 120 | 84  | 61 | 45 | 32 | 21 | 17 | 13 | 9  | 6 | 4 | 2 |
| 88%  | 164 | 124 | 86  | 63 | 46 | 32 | 22 | 17 | 13 | 9  | 7 | 4 | 2 |
| 89%  | 169 | 127 | 88  | 64 | 47 | 33 | 22 | 18 | 13 | 10 | 7 | 4 | 2 |
| 90%  | 175 | 131 | 91  | 66 | 48 | 34 | 23 | 18 | 13 | 10 | 7 | 4 | 2 |
| 91%  | 181 | 135 | 93  | 67 | 49 | 34 | 23 | 18 | 14 | 10 | 7 | 4 | 2 |
| 92%  | 187 | 139 | 95  | 69 | 50 | 35 | 24 | 19 | 14 | 10 | 7 | 4 | 2 |
| 93%  | 194 | 143 | 98  | 70 | 51 | 36 | 24 | 19 | 14 | 10 | 7 | 5 | 2 |
| 94%  | 201 | 147 | 100 | 72 | 52 | 36 | 25 | 19 | 15 | 10 | 7 | 5 | 2 |
| 95%  | 208 | 152 | 103 | 74 | 53 | 37 | 25 | 20 | 15 | 11 | 7 | 5 | 2 |
| 96%  | 216 | 157 | 106 | 75 | 54 | 38 | 26 | 20 | 15 | 11 | 7 | 5 | 2 |
| 97%  | 224 | 162 | 108 | 77 | 55 | 39 | 26 | 20 | 15 | 11 | 7 | 5 | 2 |
| 98%  | 233 | 167 | 111 | 79 | 57 | 40 | 27 | 21 | 16 | 11 | 8 | 5 | 2 |
| 99%  | 243 | 173 | 114 | 81 | 58 | 40 | 27 | 21 | 16 | 11 | 8 | 5 | 2 |
| 100% | 253 | 179 | 118 | 83 | 59 | 41 | 28 | 22 | 16 | 11 | 8 | 5 | 2 |

**Supplementary Table S10.** Differences between AMs' consumption levels calculated by means of novel pediatric-adjusted methodology vs conventional ATC/DDD methodology for carbapenems (base case), %

| Share /<br>Age<br>group | 1-11<br>month | 1<br>year | 2<br>years | 3<br>years | 4<br>years | 5<br>years | 6<br>years | 7<br>years | 8<br>years | 9<br>years | 10<br>years | 11<br>years | 12<br>years |
|-------------------------|---------------|-----------|------------|------------|------------|------------|------------|------------|------------|------------|-------------|-------------|-------------|
| 1%                      | 1             | 1         | 1          | 0          | 0          | 0          | 0          | 0          | 0          | 0          | 0           | 0           | 0           |
| 2%                      | 1             | 1         | 1          | 1          | 1          | 1          | 0          | 0          | 0          | 0          | 0           | 0           | 0           |
| 3%                      | 2             | 2         | 2          | 1          | 1          | 1          | 1          | 0          | 0          | 0          | 0           | 0           | 0           |
| 4%                      | 3             | 3         | 2          | 2          | 2          | 1          | 1          | 1          | 0          | 0          | 0           | 0           | 0           |
| 5%                      | 4             | 3         | 3          | 2          | 2          | 2          | 1          | 1          | 0          | 0          | 0           | 0           | 0           |
| 6%                      | 5             | 4         | 3          | 3          | 3          | 2          | 2          | 1          | 0          | 0          | 0           | 0           | 0           |
| 7%                      | 5             | 5         | 4          | 4          | 3          | 2          | 2          | 1          | 1          | 0          | 0           | 0           | 0           |
| 8%                      | 6             | 6         | 5          | 4          | 3          | 3          | 2          | 1          | 1          | 0          | 0           | 0           | 0           |
| 9%                      | 7             | 6         | 5          | 5          | 4          | 3          | 2          | 2          | 1          | 0          | 0           | 0           | 0           |
| 10%                     | 8             | 7         | 6          | 5          | 4          | 3          | 3          | 2          | 1          | 1          | 0           | 0           | 0           |
| 11%                     | 9             | 8         | 7          | 6          | 5          | 4          | 3          | 2          | 1          | 1          | 0           | 0           | 0           |
| 12%                     | 10            | 9         | 7          | 6          | 5          | 4          | 3          | 2          | 1          | 1          | 0           | 0           | 0           |
| 13%                     | 10            | 9         | 8          | 7          | 6          | 4          | 3          | 2          | 1          | 1          | 0           | 0           | 0           |
| 14%                     | 11            | 10        | 9          | 7          | 6          | 5          | 4          | 2          | 1          | 1          | 0           | 0           | 0           |
| 15%                     | 12            | 11        | 9          | 8          | 6          | 5          | 4          | 3          | 1          | 1          | 0           | 0           | 0           |
| 16%                     | 13            | 12        | 10         | 8          | 7          | 6          | 4          | 3          | 1          | 1          | 0           | 0           | 0           |
| 17%                     | 14            | 13        | 11         | 9          | 7          | 6          | 4          | 3          | 1          | 1          | 0           | 0           | 0           |
| 18%                     | 15            | 13        | 11         | 9          | 8          | 6          | 5          | 3          | 2          | 1          | 0           | 0           | 0           |
| 19%                     | 16            | 14        | 12         | 10         | 8          | 7          | 5          | 3          | 2          | 1          | 0           | 0           | 0           |
| 20%                     | 17            | 15        | 13         | 11         | 9          | 7          | 5          | 4          | 2          | 1          | 0           | 0           | 0           |
| 21%                     | 18            | 16        | 13         | 11         | 9          | 7          | 6          | 4          | 2          | 1          | 0           | 0           | 0           |
| 22%                     | 19            | 17        | 14         | 12         | 10         | 8          | 6          | 4          | 2          | 1          | 0           | 0           | 0           |
| 23%                     | 20            | 18        | 15         | 12         | 10         | 8          | 6          | 4          | 2          | 1          | 0           | 0           | 0           |
| 24%                     | 21            | 19        | 16         | 13         | 11         | 9          | 6          | 4          | 2          | 1          | 0           | 0           | 0           |
| 25%                     | 22            | 20        | 16         | 14         | 11         | 9          | 7          | 5          | 2          | 1          | 0           | 0           | 0           |
| 26%                     | 23            | 21        | 17         | 14         | 12         | 9          | 7          | 5          | 2          | 1          | 0           | 0           | 0           |
| 27%                     | 25            | 22        | 18         | 15         | 12         | 10         | 7          | 5          | 2          | 1          | 0           | 0           | 0           |
| 28%                     | 26            | 23        | 19         | 16         | 13         | 10         | 8          | 5          | 2          | 1          | 0           | 0           | 0           |
| 29%                     | 27            | 24        | 20         | 16         | 13         | 11         | 8          | 5          | 3          | 2          | 0           | 0           | 0           |
| 30%                     | 28            | 25        | 20         | 17         | 14         | 11         | 8          | 5          | 3          | 2          | 1           | 0           | 0           |
| 31%                     | 29            | 26        | 21         | 18         | 14         | 11         | 9          | 6          | 3          | 2          | 1           | 0           | 0           |
| 32%                     | 31            | 27        | 22         | 18         | 15         | 12         | 9          | 6          | 3          | 2          | 1           | 0           | 0           |
| 33%                     | 32            | 28        | 23         | 19         | 16         | 12         | 9          | 6          | 3          | 2          | 1           | 0           | 0           |
| 34%                     | 33            | 29        | 24         | 20         | 16         | 13         | 9          | 6          | 3          | 2          | 1           | 0           | 0           |
| 35%                     | 34            | 30        | 25         | 20         | 17         | 13         | 10         | 6          | 3          | 2          | 1           | 0           | 0           |
| 36%                     | 36            | 31        | 26         | 21         | 17         | 14         | 10         | 7          | 3          | 2          | 1           | 0           | 0           |
| 37%                     | 37            | 32        | 26         | 22         | 18         | 14         | 10         | 7          | 3          | 2          | 1           | 0           | 0           |
| 38%                     | 39            | 34        | 27         | 23         | 18         | 14         | 11         | 7          | 3          | 2          | 1           | 0           | 0           |
| 39%                     | 40            | 35        | 28         | 23         | 19         | 15         | 11         | 7          | 3          | 2          | 1           | 0           | 0           |
| 40%                     | 41            | 36        | 29         | 24         | 19         | 15         | 11         | 7          | 4          | 2          | 1           | 0           | 0           |
| 41%                     | 43            | 37        | 30         | 25         | 20         | 16         | 12         | 8          | 4          | 2          | 1           | 0           | 0           |
| 42%                     | 44            | 38        | 31         | 26         | 21         | 16         | 12         | 8          | 4          | 2          | 1           | 0           | 0           |
| 43%                     | 46            | 40        | 32         | 26         | 21         | 17         | 12         | 8          | 4          | 2          | 1           | 0           | 0           |
| 44%                     | 48            | 41        | 33         | 27         | 22         | 17         | 13         | 8          | 4          | 2          | 1           | 0           | 0           |
| 45%                     | 49            | 42        | 34         | 28         | 22         | 18         | 13         | 8          | 4          | 2          | 1           | 0           | 0           |
| 46%                     | 51            | 44        | 35         | 29         | 23         | 18         | 13         | 9          | 4          | 3          | 1           | 0           | 0           |
| 47%                     | 53            | 45        | 36         | 29         | 24         | 19         | 14         | 9          | 4          | 3          | 1           | 0           | 0           |

|      |     |     |     |    |    |    |    |    |    |   |   |   |   |
|------|-----|-----|-----|----|----|----|----|----|----|---|---|---|---|
| 48%  | 54  | 47  | 37  | 30 | 24 | 19 | 14 | 9  | 4  | 3 | 1 | 0 | 0 |
| 49%  | 56  | 48  | 38  | 31 | 25 | 20 | 14 | 9  | 4  | 3 | 1 | 0 | 0 |
| 50%  | 58  | 49  | 40  | 32 | 26 | 20 | 15 | 10 | 5  | 3 | 1 | 0 | 0 |
| 51%  | 60  | 51  | 41  | 33 | 26 | 21 | 15 | 10 | 5  | 3 | 1 | 0 | 0 |
| 52%  | 62  | 52  | 42  | 34 | 27 | 21 | 15 | 10 | 5  | 3 | 1 | 0 | 0 |
| 53%  | 64  | 54  | 43  | 35 | 28 | 22 | 16 | 10 | 5  | 3 | 1 | 0 | 0 |
| 54%  | 65  | 56  | 44  | 36 | 28 | 22 | 16 | 10 | 5  | 3 | 1 | 0 | 0 |
| 55%  | 68  | 57  | 45  | 36 | 29 | 23 | 17 | 11 | 5  | 3 | 1 | 0 | 0 |
| 56%  | 70  | 59  | 47  | 37 | 30 | 23 | 17 | 11 | 5  | 3 | 1 | 0 | 0 |
| 57%  | 72  | 61  | 48  | 38 | 30 | 24 | 17 | 11 | 5  | 3 | 1 | 0 | 0 |
| 58%  | 74  | 62  | 49  | 39 | 31 | 24 | 18 | 11 | 5  | 3 | 1 | 0 | 0 |
| 59%  | 76  | 64  | 50  | 40 | 32 | 25 | 18 | 12 | 5  | 3 | 1 | 0 | 0 |
| 60%  | 79  | 66  | 52  | 41 | 33 | 25 | 18 | 12 | 6  | 3 | 1 | 0 | 0 |
| 61%  | 81  | 68  | 53  | 42 | 33 | 26 | 19 | 12 | 6  | 3 | 1 | 0 | 0 |
| 62%  | 83  | 70  | 54  | 43 | 34 | 26 | 19 | 12 | 6  | 4 | 1 | 0 | 0 |
| 63%  | 86  | 72  | 56  | 44 | 35 | 27 | 20 | 12 | 6  | 4 | 1 | 0 | 0 |
| 64%  | 88  | 74  | 57  | 45 | 36 | 27 | 20 | 13 | 6  | 4 | 1 | 0 | 0 |
| 65%  | 91  | 76  | 58  | 46 | 36 | 28 | 20 | 13 | 6  | 4 | 1 | 0 | 0 |
| 66%  | 94  | 78  | 60  | 47 | 37 | 29 | 21 | 13 | 6  | 4 | 1 | 0 | 0 |
| 67%  | 97  | 80  | 61  | 48 | 38 | 29 | 21 | 13 | 6  | 4 | 1 | 0 | 0 |
| 68%  | 99  | 82  | 63  | 49 | 39 | 30 | 22 | 14 | 6  | 4 | 1 | 0 | 0 |
| 69%  | 102 | 84  | 64  | 51 | 40 | 30 | 22 | 14 | 7  | 4 | 1 | 0 | 0 |
| 70%  | 106 | 87  | 66  | 52 | 40 | 31 | 22 | 14 | 7  | 4 | 1 | 0 | 0 |
| 71%  | 109 | 89  | 68  | 53 | 41 | 31 | 23 | 14 | 7  | 4 | 1 | 0 | 0 |
| 72%  | 112 | 91  | 69  | 54 | 42 | 32 | 23 | 15 | 7  | 4 | 1 | 0 | 0 |
| 73%  | 115 | 94  | 71  | 55 | 43 | 33 | 24 | 15 | 7  | 4 | 1 | 0 | 0 |
| 74%  | 119 | 96  | 73  | 56 | 44 | 33 | 24 | 15 | 7  | 4 | 1 | 0 | 0 |
| 75%  | 122 | 99  | 74  | 58 | 45 | 34 | 24 | 15 | 7  | 4 | 1 | 0 | 0 |
| 76%  | 126 | 102 | 76  | 59 | 46 | 34 | 25 | 16 | 7  | 4 | 1 | 0 | 0 |
| 77%  | 130 | 104 | 78  | 60 | 46 | 35 | 25 | 16 | 8  | 4 | 1 | 0 | 0 |
| 78%  | 134 | 107 | 80  | 61 | 47 | 36 | 26 | 16 | 8  | 5 | 1 | 0 | 0 |
| 79%  | 138 | 110 | 82  | 63 | 48 | 36 | 26 | 17 | 8  | 5 | 1 | 0 | 0 |
| 80%  | 142 | 113 | 84  | 64 | 49 | 37 | 27 | 17 | 8  | 5 | 1 | 0 | 0 |
| 81%  | 147 | 116 | 86  | 65 | 50 | 38 | 27 | 17 | 8  | 5 | 1 | 0 | 0 |
| 82%  | 151 | 119 | 88  | 67 | 51 | 38 | 27 | 17 | 8  | 5 | 1 | 0 | 0 |
| 83%  | 156 | 123 | 90  | 68 | 52 | 39 | 28 | 18 | 8  | 5 | 2 | 0 | 0 |
| 84%  | 161 | 126 | 92  | 70 | 53 | 40 | 28 | 18 | 8  | 5 | 2 | 0 | 0 |
| 85%  | 166 | 130 | 94  | 71 | 54 | 40 | 29 | 18 | 9  | 5 | 2 | 0 | 0 |
| 86%  | 172 | 133 | 96  | 73 | 55 | 41 | 29 | 18 | 9  | 5 | 2 | 0 | 0 |
| 87%  | 177 | 137 | 98  | 74 | 56 | 42 | 30 | 19 | 9  | 5 | 2 | 0 | 0 |
| 88%  | 183 | 141 | 101 | 76 | 57 | 43 | 30 | 19 | 9  | 5 | 2 | 0 | 0 |
| 89%  | 189 | 145 | 103 | 77 | 58 | 43 | 31 | 19 | 9  | 5 | 2 | 0 | 0 |
| 90%  | 196 | 149 | 106 | 79 | 59 | 44 | 31 | 19 | 9  | 5 | 2 | 0 | 0 |
| 91%  | 202 | 153 | 108 | 80 | 60 | 45 | 32 | 20 | 9  | 5 | 2 | 0 | 0 |
| 92%  | 209 | 158 | 111 | 82 | 62 | 46 | 32 | 20 | 10 | 5 | 2 | 0 | 0 |
| 93%  | 217 | 162 | 113 | 84 | 63 | 46 | 33 | 20 | 10 | 6 | 2 | 0 | 0 |
| 94%  | 224 | 167 | 116 | 85 | 64 | 47 | 33 | 21 | 10 | 6 | 2 | 0 | 0 |
| 95%  | 232 | 172 | 119 | 87 | 65 | 48 | 34 | 21 | 10 | 6 | 2 | 0 | 0 |
| 96%  | 241 | 177 | 122 | 89 | 66 | 49 | 34 | 21 | 10 | 6 | 2 | 0 | 0 |
| 97%  | 250 | 182 | 125 | 91 | 67 | 49 | 35 | 22 | 10 | 6 | 2 | 0 | 0 |
| 98%  | 259 | 188 | 128 | 93 | 69 | 50 | 35 | 22 | 10 | 6 | 2 | 0 | 0 |
| 99%  | 269 | 194 | 131 | 95 | 70 | 51 | 36 | 22 | 10 | 6 | 2 | 0 | 0 |
| 100% | 280 | 200 | 134 | 97 | 71 | 52 | 36 | 22 | 11 | 6 | 2 | 0 | 0 |

**Supplementary Table S11.** Differences between AMs' consumption levels calculated by means of novel pediatric-adjusted methodology vs conventional ATC/DDD methodology for fluoroquinolones (base case), %

| Share /<br>Age<br>group | 1-11<br>month | 1<br>year | 2<br>years | 3<br>years | 4<br>years | 5<br>years | 6<br>years | 7<br>years | 8<br>years | 9<br>years | 10<br>years | 11<br>years | 12<br>years |
|-------------------------|---------------|-----------|------------|------------|------------|------------|------------|------------|------------|------------|-------------|-------------|-------------|
| 1%                      | -             | -         | -          | -          | -          | 0          | 0          | 0          | 0          | 0          | 0           | 0           | 0           |
| 2%                      | -             | -         | -          | -          | -          | 1          | 0          | 0          | 0          | 0          | 0           | 0           | 0           |
| 3%                      | -             | -         | -          | -          | -          | 1          | 1          | 0          | 0          | 0          | 0           | 0           | 0           |
| 4%                      | -             | -         | -          | -          | -          | 1          | 1          | 0          | 0          | 0          | 0           | 0           | 0           |
| 5%                      | -             | -         | -          | -          | -          | 1          | 1          | 1          | 0          | 0          | 0           | 0           | 0           |
| 6%                      | -             | -         | -          | -          | -          | 2          | 1          | 1          | 0          | 0          | 0           | 0           | 0           |
| 7%                      | -             | -         | -          | -          | -          | 2          | 1          | 1          | 0          | 0          | 0           | 0           | 0           |
| 8%                      | -             | -         | -          | -          | -          | 2          | 2          | 1          | 0          | 0          | 0           | 0           | 0           |
| 9%                      | -             | -         | -          | -          | -          | 3          | 2          | 1          | 0          | 0          | 0           | 0           | 0           |
| 10%                     | -             | -         | -          | -          | -          | 3          | 2          | 1          | 0          | 0          | 0           | 0           | 0           |
| 11%                     | -             | -         | -          | -          | -          | 3          | 2          | 1          | 0          | 0          | 0           | 0           | 0           |
| 12%                     | -             | -         | -          | -          | -          | 4          | 2          | 1          | 0          | 0          | 0           | 0           | 0           |
| 13%                     | -             | -         | -          | -          | -          | 4          | 3          | 1          | 0          | 0          | 0           | 0           | 0           |
| 14%                     | -             | -         | -          | -          | -          | 4          | 3          | 2          | 0          | 0          | 0           | 0           | 0           |
| 15%                     | -             | -         | -          | -          | -          | 4          | 3          | 2          | 0          | 0          | 0           | 0           | 0           |
| 16%                     | -             | -         | -          | -          | -          | 5          | 3          | 2          | 0          | 0          | 0           | 0           | 0           |
| 17%                     | -             | -         | -          | -          | -          | 5          | 4          | 2          | 0          | 0          | 0           | 0           | 0           |
| 18%                     | -             | -         | -          | -          | -          | 5          | 4          | 2          | 0          | 0          | 0           | 0           | 0           |
| 19%                     | -             | -         | -          | -          | -          | 6          | 4          | 2          | 0          | 0          | 0           | 0           | 0           |
| 20%                     | -             | -         | -          | -          | -          | 6          | 4          | 2          | 0          | 0          | 0           | 0           | 0           |
| 21%                     | -             | -         | -          | -          | -          | 6          | 4          | 2          | 0          | 0          | 0           | 0           | 0           |
| 22%                     | -             | -         | -          | -          | -          | 7          | 5          | 3          | 0          | 0          | 0           | 0           | 0           |
| 23%                     | -             | -         | -          | -          | -          | 7          | 5          | 3          | 0          | 0          | 0           | 0           | 0           |
| 24%                     | -             | -         | -          | -          | -          | 7          | 5          | 3          | 0          | 0          | 0           | 0           | 0           |
| 25%                     | -             | -         | -          | -          | -          | 8          | 5          | 3          | 0          | 0          | 0           | 0           | 0           |
| 26%                     | -             | -         | -          | -          | -          | 8          | 6          | 3          | 0          | 0          | 0           | 0           | 0           |
| 27%                     | -             | -         | -          | -          | -          | 8          | 6          | 3          | 0          | 0          | 0           | 0           | 0           |
| 28%                     | -             | -         | -          | -          | -          | 9          | 6          | 3          | 0          | 0          | 0           | 0           | 0           |
| 29%                     | -             | -         | -          | -          | -          | 9          | 6          | 3          | 0          | 0          | 0           | 0           | 0           |
| 30%                     | -             | -         | -          | -          | -          | 9          | 6          | 3          | 1          | 0          | 0           | 0           | 0           |
| 31%                     | -             | -         | -          | -          | -          | 10         | 7          | 4          | 1          | 0          | 0           | 0           | 0           |
| 32%                     | -             | -         | -          | -          | -          | 10         | 7          | 4          | 1          | 0          | 0           | 0           | 0           |
| 33%                     | -             | -         | -          | -          | -          | 10         | 7          | 4          | 1          | 0          | 0           | 0           | 0           |
| 34%                     | -             | -         | -          | -          | -          | 11         | 7          | 4          | 1          | 0          | 0           | 0           | 0           |
| 35%                     | -             | -         | -          | -          | -          | 11         | 8          | 4          | 1          | 0          | 0           | 0           | 0           |
| 36%                     | -             | -         | -          | -          | -          | 11         | 8          | 4          | 1          | 0          | 0           | 0           | 0           |
| 37%                     | -             | -         | -          | -          | -          | 12         | 8          | 4          | 1          | 0          | 0           | 0           | 0           |
| 38%                     | -             | -         | -          | -          | -          | 12         | 8          | 4          | 1          | 0          | 0           | 0           | 0           |
| 39%                     | -             | -         | -          | -          | -          | 12         | 9          | 5          | 1          | 0          | 0           | 0           | 0           |
| 40%                     | -             | -         | -          | -          | -          | 13         | 9          | 5          | 1          | 0          | 0           | 0           | 0           |
| 41%                     | -             | -         | -          | -          | -          | 13         | 9          | 5          | 1          | 0          | 0           | 0           | 0           |
| 42%                     | -             | -         | -          | -          | -          | 14         | 9          | 5          | 1          | 0          | 0           | 0           | 0           |
| 43%                     | -             | -         | -          | -          | -          | 14         | 9          | 5          | 1          | 0          | 0           | 0           | 0           |
| 44%                     | -             | -         | -          | -          | -          | 14         | 10         | 5          | 1          | 0          | 0           | 0           | 0           |
| 45%                     | -             | -         | -          | -          | -          | 15         | 10         | 5          | 1          | 0          | 0           | 0           | 0           |
| 46%                     | -             | -         | -          | -          | -          | 15         | 10         | 5          | 1          | 0          | 0           | 0           | 0           |
| 47%                     | -             | -         | -          | -          | -          | 15         | 10         | 6          | 1          | 0          | 0           | 0           | 0           |

|      |   |   |   |   |   |    |    |    |   |   |   |   |   |
|------|---|---|---|---|---|----|----|----|---|---|---|---|---|
| 48%  | - | - | - | - | - | 16 | 11 | 6  | 1 | 0 | 0 | 0 | 0 |
| 49%  | - | - | - | - | - | 16 | 11 | 6  | 1 | 0 | 0 | 0 | 0 |
| 50%  | - | - | - | - | - | 17 | 11 | 6  | 1 | 0 | 0 | 0 | 0 |
| 51%  | - | - | - | - | - | 17 | 11 | 6  | 1 | 0 | 0 | 0 | 0 |
| 52%  | - | - | - | - | - | 17 | 12 | 6  | 1 | 0 | 0 | 0 | 0 |
| 53%  | - | - | - | - | - | 18 | 12 | 6  | 1 | 0 | 0 | 0 | 0 |
| 54%  | - | - | - | - | - | 18 | 12 | 6  | 1 | 0 | 0 | 0 | 0 |
| 55%  | - | - | - | - | - | 19 | 12 | 7  | 1 | 0 | 0 | 0 | 0 |
| 56%  | - | - | - | - | - | 19 | 13 | 7  | 1 | 0 | 0 | 0 | 0 |
| 57%  | - | - | - | - | - | 19 | 13 | 7  | 1 | 0 | 0 | 0 | 0 |
| 58%  | - | - | - | - | - | 20 | 13 | 7  | 1 | 0 | 0 | 0 | 0 |
| 59%  | - | - | - | - | - | 20 | 14 | 7  | 1 | 0 | 0 | 0 | 0 |
| 60%  | - | - | - | - | - | 21 | 14 | 7  | 1 | 0 | 0 | 0 | 0 |
| 61%  | - | - | - | - | - | 21 | 14 | 7  | 1 | 0 | 0 | 0 | 0 |
| 62%  | - | - | - | - | - | 21 | 14 | 7  | 1 | 0 | 0 | 0 | 0 |
| 63%  | - | - | - | - | - | 22 | 15 | 8  | 1 | 0 | 0 | 0 | 0 |
| 64%  | - | - | - | - | - | 22 | 15 | 8  | 1 | 0 | 0 | 0 | 0 |
| 65%  | - | - | - | - | - | 23 | 15 | 8  | 1 | 0 | 0 | 0 | 0 |
| 66%  | - | - | - | - | - | 23 | 15 | 8  | 1 | 0 | 0 | 0 | 0 |
| 67%  | - | - | - | - | - | 24 | 16 | 8  | 1 | 0 | 0 | 0 | 0 |
| 68%  | - | - | - | - | - | 24 | 16 | 8  | 1 | 0 | 0 | 0 | 0 |
| 69%  | - | - | - | - | - | 24 | 16 | 8  | 1 | 0 | 0 | 0 | 0 |
| 70%  | - | - | - | - | - | 25 | 16 | 9  | 1 | 0 | 0 | 0 | 0 |
| 71%  | - | - | - | - | - | 25 | 17 | 9  | 1 | 0 | 0 | 0 | 0 |
| 72%  | - | - | - | - | - | 26 | 17 | 9  | 1 | 0 | 0 | 0 | 0 |
| 73%  | - | - | - | - | - | 26 | 17 | 9  | 1 | 0 | 0 | 0 | 0 |
| 74%  | - | - | - | - | - | 27 | 18 | 9  | 1 | 0 | 0 | 0 | 0 |
| 75%  | - | - | - | - | - | 27 | 18 | 9  | 1 | 0 | 0 | 0 | 0 |
| 76%  | - | - | - | - | - | 28 | 18 | 9  | 1 | 0 | 0 | 0 | 0 |
| 77%  | - | - | - | - | - | 28 | 18 | 9  | 1 | 0 | 0 | 0 | 0 |
| 78%  | - | - | - | - | - | 28 | 19 | 10 | 1 | 0 | 0 | 0 | 0 |
| 79%  | - | - | - | - | - | 29 | 19 | 10 | 1 | 0 | 0 | 0 | 0 |
| 80%  | - | - | - | - | - | 29 | 19 | 10 | 1 | 0 | 0 | 0 | 0 |
| 81%  | - | - | - | - | - | 30 | 20 | 10 | 1 | 0 | 0 | 0 | 0 |
| 82%  | - | - | - | - | - | 30 | 20 | 10 | 1 | 0 | 0 | 0 | 0 |
| 83%  | - | - | - | - | - | 31 | 20 | 10 | 1 | 0 | 0 | 0 | 0 |
| 84%  | - | - | - | - | - | 31 | 20 | 10 | 1 | 0 | 0 | 0 | 0 |
| 85%  | - | - | - | - | - | 32 | 21 | 11 | 1 | 0 | 0 | 0 | 0 |
| 86%  | - | - | - | - | - | 32 | 21 | 11 | 1 | 0 | 0 | 0 | 0 |
| 87%  | - | - | - | - | - | 33 | 21 | 11 | 2 | 0 | 0 | 0 | 0 |
| 88%  | - | - | - | - | - | 33 | 22 | 11 | 2 | 0 | 0 | 0 | 0 |
| 89%  | - | - | - | - | - | 34 | 22 | 11 | 2 | 0 | 0 | 0 | 0 |
| 90%  | - | - | - | - | - | 34 | 22 | 11 | 2 | 0 | 0 | 0 | 0 |
| 91%  | - | - | - | - | - | 35 | 22 | 11 | 2 | 0 | 0 | 0 | 0 |
| 92%  | - | - | - | - | - | 35 | 23 | 11 | 2 | 0 | 0 | 0 | 0 |
| 93%  | - | - | - | - | - | 36 | 23 | 12 | 2 | 0 | 0 | 0 | 0 |
| 94%  | - | - | - | - | - | 37 | 23 | 12 | 2 | 0 | 0 | 0 | 0 |
| 95%  | - | - | - | - | - | 37 | 24 | 12 | 2 | 0 | 0 | 0 | 0 |
| 96%  | - | - | - | - | - | 38 | 24 | 12 | 2 | 0 | 0 | 0 | 0 |
| 97%  | - | - | - | - | - | 38 | 24 | 12 | 2 | 0 | 0 | 0 | 0 |
| 98%  | - | - | - | - | - | 39 | 25 | 12 | 2 | 0 | 0 | 0 | 0 |
| 99%  | - | - | - | - | - | 39 | 25 | 12 | 2 | 0 | 0 | 0 | 0 |
| 100% | - | - | - | - | - | 40 | 25 | 13 | 2 | 0 | 0 | 0 | 0 |

**Supplementary Table S12.** Differences between AMs' consumption levels calculated by means of novel pediatric-adjusted methodology vs conventional ATC/DDD methodology for macrolides (base case), %

| Share /<br>Age<br>group | 1-11<br>month | 1<br>year | 2<br>years | 3<br>years | 4<br>years | 5<br>years | 6<br>years | 7<br>years | 8<br>years | 9<br>years | 10<br>years | 11<br>years | 12<br>years |
|-------------------------|---------------|-----------|------------|------------|------------|------------|------------|------------|------------|------------|-------------|-------------|-------------|
| 1%                      | 1             | 1         | 1          | 0          | 0          | 0          | 0          | 0          | 0          | 0          | 0           | 0           | 0           |
| 2%                      | 1             | 1         | 1          | 1          | 1          | 1          | 1          | 0          | 0          | 0          | 0           | 0           | 0           |
| 3%                      | 2             | 2         | 2          | 1          | 1          | 1          | 1          | 1          | 0          | 0          | 0           | 0           | 0           |
| 4%                      | 3             | 2         | 2          | 2          | 2          | 1          | 1          | 1          | 1          | 0          | 0           | 0           | 0           |
| 5%                      | 3             | 3         | 3          | 2          | 2          | 2          | 1          | 1          | 1          | 0          | 0           | 0           | 0           |
| 6%                      | 4             | 4         | 3          | 3          | 2          | 2          | 2          | 1          | 1          | 0          | 0           | 0           | 0           |
| 7%                      | 5             | 4         | 4          | 3          | 3          | 2          | 2          | 2          | 1          | 0          | 0           | 0           | 0           |
| 8%                      | 6             | 5         | 4          | 4          | 3          | 3          | 2          | 2          | 1          | 0          | 0           | 0           | 0           |
| 9%                      | 6             | 6         | 5          | 4          | 4          | 3          | 3          | 2          | 1          | 0          | 0           | 0           | 0           |
| 10%                     | 7             | 6         | 6          | 5          | 4          | 4          | 3          | 2          | 1          | 1          | 0           | 0           | 0           |
| 11%                     | 8             | 7         | 6          | 5          | 5          | 4          | 3          | 2          | 2          | 1          | 0           | 0           | 0           |
| 12%                     | 9             | 8         | 7          | 6          | 5          | 4          | 3          | 3          | 2          | 1          | 0           | 0           | 0           |
| 13%                     | 9             | 9         | 7          | 6          | 5          | 5          | 4          | 3          | 2          | 1          | 0           | 0           | 0           |
| 14%                     | 10            | 9         | 8          | 7          | 6          | 5          | 4          | 3          | 2          | 1          | 0           | 0           | 0           |
| 15%                     | 11            | 10        | 9          | 7          | 6          | 5          | 4          | 3          | 2          | 1          | 0           | 0           | 0           |
| 16%                     | 12            | 11        | 9          | 8          | 7          | 6          | 5          | 3          | 2          | 1          | 0           | 0           | 0           |
| 17%                     | 13            | 12        | 10         | 8          | 7          | 6          | 5          | 4          | 2          | 1          | 0           | 0           | 0           |
| 18%                     | 14            | 12        | 11         | 9          | 8          | 7          | 5          | 4          | 3          | 1          | 0           | 0           | 0           |
| 19%                     | 14            | 13        | 11         | 10         | 8          | 7          | 6          | 4          | 3          | 1          | 0           | 0           | 0           |
| 20%                     | 15            | 14        | 12         | 10         | 9          | 7          | 6          | 4          | 3          | 1          | 0           | 0           | 0           |
| 21%                     | 16            | 15        | 13         | 11         | 9          | 8          | 6          | 5          | 3          | 1          | 0           | 0           | 0           |
| 22%                     | 17            | 15        | 13         | 11         | 10         | 8          | 6          | 5          | 3          | 1          | 0           | 0           | 0           |
| 23%                     | 18            | 16        | 14         | 12         | 10         | 8          | 7          | 5          | 3          | 1          | 0           | 0           | 0           |
| 24%                     | 19            | 17        | 15         | 12         | 11         | 9          | 7          | 5          | 3          | 1          | 0           | 0           | 0           |
| 25%                     | 20            | 18        | 15         | 13         | 11         | 9          | 7          | 6          | 4          | 1          | 0           | 0           | 0           |
| 26%                     | 21            | 19        | 16         | 14         | 12         | 10         | 8          | 6          | 4          | 1          | 0           | 0           | 0           |
| 27%                     | 22            | 20        | 17         | 14         | 12         | 10         | 8          | 6          | 4          | 1          | 0           | 0           | 0           |
| 28%                     | 23            | 21        | 18         | 15         | 13         | 11         | 8          | 6          | 4          | 2          | 0           | 0           | 0           |
| 29%                     | 24            | 22        | 18         | 16         | 13         | 11         | 9          | 7          | 4          | 2          | 0           | 0           | 0           |
| 30%                     | 25            | 23        | 19         | 16         | 14         | 11         | 9          | 7          | 4          | 2          | 0           | 0           | 0           |
| 31%                     | 26            | 24        | 20         | 17         | 14         | 12         | 9          | 7          | 4          | 2          | 0           | 0           | 0           |
| 32%                     | 27            | 25        | 21         | 18         | 15         | 12         | 10         | 7          | 5          | 2          | 0           | 0           | 0           |
| 33%                     | 29            | 26        | 21         | 18         | 15         | 13         | 10         | 7          | 5          | 2          | 0           | 0           | 0           |
| 34%                     | 30            | 27        | 22         | 19         | 16         | 13         | 10         | 8          | 5          | 2          | 0           | 0           | 0           |
| 35%                     | 31            | 28        | 23         | 20         | 16         | 14         | 11         | 8          | 5          | 2          | 0           | 0           | 0           |
| 36%                     | 32            | 29        | 24         | 20         | 17         | 14         | 11         | 8          | 5          | 2          | 0           | 0           | 0           |
| 37%                     | 33            | 30        | 25         | 21         | 18         | 15         | 11         | 8          | 5          | 2          | 0           | 0           | 0           |
| 38%                     | 35            | 31        | 26         | 22         | 18         | 15         | 12         | 9          | 5          | 2          | 0           | 0           | 0           |
| 39%                     | 36            | 32        | 27         | 22         | 19         | 15         | 12         | 9          | 6          | 2          | 0           | 0           | 0           |
| 40%                     | 37            | 33        | 27         | 23         | 19         | 16         | 12         | 9          | 6          | 2          | 0           | 0           | 0           |
| 41%                     | 39            | 34        | 28         | 24         | 20         | 16         | 13         | 10         | 6          | 2          | 0           | 0           | 0           |
| 42%                     | 40            | 35        | 29         | 25         | 21         | 17         | 13         | 10         | 6          | 2          | 0           | 0           | 0           |
| 43%                     | 42            | 37        | 30         | 25         | 21         | 17         | 14         | 10         | 6          | 2          | 0           | 0           | 0           |
| 44%                     | 43            | 38        | 31         | 26         | 22         | 18         | 14         | 10         | 6          | 2          | 0           | 0           | 0           |
| 45%                     | 44            | 39        | 32         | 27         | 22         | 18         | 14         | 11         | 7          | 2          | 0           | 0           | 0           |
| 46%                     | 46            | 40        | 33         | 28         | 23         | 19         | 15         | 11         | 7          | 3          | 0           | 0           | 0           |
| 47%                     | 48            | 42        | 34         | 28         | 24         | 19         | 15         | 11         | 7          | 3          | 0           | 0           | 0           |



|      |     |     |     |    |    |    |    |    |    |   |   |   |   |
|------|-----|-----|-----|----|----|----|----|----|----|---|---|---|---|
| 48%  | 49  | 43  | 35  | 29 | 24 | 20 | 15 | 11 | 7  | 3 | 0 | 0 | 0 |
| 49%  | 51  | 44  | 36  | 30 | 25 | 20 | 16 | 12 | 7  | 3 | 0 | 0 | 0 |
| 50%  | 52  | 46  | 37  | 31 | 26 | 21 | 16 | 12 | 7  | 3 | 0 | 0 | 0 |
| 51%  | 54  | 47  | 38  | 32 | 26 | 21 | 17 | 12 | 7  | 3 | 0 | 0 | 0 |
| 52%  | 56  | 48  | 40  | 33 | 27 | 22 | 17 | 12 | 8  | 3 | 0 | 0 | 0 |
| 53%  | 58  | 50  | 41  | 33 | 28 | 22 | 17 | 13 | 8  | 3 | 0 | 0 | 0 |
| 54%  | 59  | 51  | 42  | 34 | 28 | 23 | 18 | 13 | 8  | 3 | 0 | 0 | 0 |
| 55%  | 61  | 53  | 43  | 35 | 29 | 24 | 18 | 13 | 8  | 3 | 0 | 0 | 0 |
| 56%  | 63  | 55  | 44  | 36 | 30 | 24 | 19 | 14 | 8  | 3 | 0 | 0 | 0 |
| 57%  | 65  | 56  | 45  | 37 | 30 | 25 | 19 | 14 | 8  | 3 | 0 | 0 | 0 |
| 58%  | 67  | 58  | 47  | 38 | 31 | 25 | 19 | 14 | 9  | 3 | 0 | 0 | 0 |
| 59%  | 69  | 60  | 48  | 39 | 32 | 26 | 20 | 14 | 9  | 3 | 0 | 0 | 0 |
| 60%  | 72  | 61  | 49  | 40 | 33 | 26 | 20 | 15 | 9  | 3 | 0 | 0 | 0 |
| 61%  | 74  | 63  | 50  | 41 | 33 | 27 | 21 | 15 | 9  | 3 | 0 | 0 | 0 |
| 62%  | 76  | 65  | 52  | 42 | 34 | 28 | 21 | 15 | 9  | 3 | 0 | 0 | 0 |
| 63%  | 78  | 67  | 53  | 43 | 35 | 28 | 21 | 16 | 9  | 4 | 0 | 0 | 0 |
| 64%  | 81  | 69  | 54  | 44 | 36 | 29 | 22 | 16 | 10 | 4 | 0 | 0 | 0 |
| 65%  | 83  | 71  | 56  | 45 | 36 | 29 | 22 | 16 | 10 | 4 | 0 | 0 | 0 |
| 66%  | 86  | 72  | 57  | 46 | 37 | 30 | 23 | 16 | 10 | 4 | 0 | 0 | 0 |
| 67%  | 88  | 75  | 59  | 47 | 38 | 31 | 23 | 17 | 10 | 4 | 0 | 0 | 0 |
| 68%  | 91  | 77  | 60  | 48 | 39 | 31 | 24 | 17 | 10 | 4 | 0 | 0 | 0 |
| 69%  | 94  | 79  | 62  | 49 | 40 | 32 | 24 | 17 | 10 | 4 | 0 | 0 | 0 |
| 70%  | 97  | 81  | 63  | 51 | 41 | 32 | 25 | 18 | 11 | 4 | 0 | 0 | 0 |
| 71%  | 100 | 83  | 65  | 52 | 41 | 33 | 25 | 18 | 11 | 4 | 0 | 0 | 0 |
| 72%  | 103 | 86  | 67  | 53 | 42 | 34 | 25 | 18 | 11 | 4 | 0 | 0 | 0 |
| 73%  | 106 | 88  | 68  | 54 | 43 | 34 | 26 | 19 | 11 | 4 | 0 | 0 | 0 |
| 74%  | 109 | 91  | 70  | 55 | 44 | 35 | 26 | 19 | 11 | 4 | 0 | 0 | 0 |
| 75%  | 113 | 93  | 72  | 56 | 45 | 36 | 27 | 19 | 11 | 4 | 0 | 0 | 0 |
| 76%  | 116 | 96  | 73  | 58 | 46 | 36 | 27 | 20 | 12 | 4 | 0 | 0 | 0 |
| 77%  | 120 | 98  | 75  | 59 | 47 | 37 | 28 | 20 | 12 | 4 | 0 | 0 | 0 |
| 78%  | 124 | 101 | 77  | 60 | 48 | 38 | 28 | 20 | 12 | 4 | 0 | 0 | 0 |
| 79%  | 128 | 104 | 79  | 62 | 49 | 38 | 29 | 20 | 12 | 4 | 0 | 0 | 0 |
| 80%  | 132 | 107 | 81  | 63 | 50 | 39 | 29 | 21 | 12 | 4 | 0 | 0 | 0 |
| 81%  | 136 | 110 | 83  | 64 | 51 | 40 | 30 | 21 | 13 | 5 | 0 | 0 | 0 |
| 82%  | 140 | 113 | 85  | 66 | 52 | 41 | 30 | 21 | 13 | 5 | 0 | 0 | 0 |
| 83%  | 145 | 116 | 87  | 67 | 53 | 41 | 31 | 22 | 13 | 5 | 0 | 0 | 0 |
| 84%  | 150 | 120 | 89  | 69 | 54 | 42 | 31 | 22 | 13 | 5 | 0 | 0 | 0 |
| 85%  | 155 | 123 | 91  | 70 | 55 | 43 | 32 | 22 | 13 | 5 | 0 | 0 | 0 |
| 86%  | 160 | 127 | 93  | 72 | 56 | 44 | 32 | 23 | 13 | 5 | 0 | 0 | 0 |
| 87%  | 166 | 130 | 96  | 73 | 57 | 44 | 33 | 23 | 14 | 5 | 0 | 0 | 0 |
| 88%  | 171 | 134 | 98  | 75 | 58 | 45 | 33 | 23 | 14 | 5 | 0 | 0 | 0 |
| 89%  | 177 | 138 | 101 | 76 | 59 | 46 | 34 | 24 | 14 | 5 | 0 | 0 | 0 |
| 90%  | 183 | 142 | 103 | 78 | 60 | 47 | 34 | 24 | 14 | 5 | 0 | 0 | 0 |
| 91%  | 190 | 147 | 106 | 80 | 61 | 48 | 35 | 24 | 14 | 5 | 0 | 0 | 0 |
| 92%  | 197 | 151 | 108 | 81 | 63 | 48 | 35 | 25 | 15 | 5 | 0 | 0 | 0 |
| 93%  | 204 | 156 | 111 | 83 | 64 | 49 | 36 | 25 | 15 | 5 | 0 | 0 | 0 |
| 94%  | 211 | 160 | 114 | 85 | 65 | 50 | 37 | 25 | 15 | 5 | 0 | 0 | 0 |
| 95%  | 219 | 165 | 116 | 87 | 66 | 51 | 37 | 26 | 15 | 5 | 0 | 0 | 0 |
| 96%  | 228 | 171 | 119 | 89 | 68 | 52 | 38 | 26 | 15 | 5 | 0 | 0 | 0 |
| 97%  | 237 | 176 | 122 | 90 | 69 | 53 | 38 | 27 | 15 | 6 | 0 | 0 | 0 |
| 98%  | 246 | 182 | 126 | 92 | 70 | 53 | 39 | 27 | 16 | 6 | 0 | 0 | 0 |
| 99%  | 256 | 188 | 129 | 94 | 71 | 54 | 39 | 27 | 16 | 6 | 0 | 0 | 0 |
| 100% | 267 | 194 | 132 | 96 | 73 | 55 | 40 | 28 | 16 | 6 | 0 | 0 | 0 |

**Supplementary Table S13.** Differences between AMs' consumption levels calculated by means of novel pediatric-adjusted methodology vs conventional ATC/DDD methodology for lincosamides (base case), %

| Share /<br>Age<br>group | 1-11<br>month | 1<br>year | 2<br>years | 3<br>years | 4<br>years | 5<br>years | 6<br>years | 7<br>years | 8<br>years | 9<br>years | 10<br>years | 11<br>years | 12<br>years |
|-------------------------|---------------|-----------|------------|------------|------------|------------|------------|------------|------------|------------|-------------|-------------|-------------|
| 1%                      | 1             | 1         | 1          | 1          | 1          | 1          | 1          | 1          | 1          | 1          | 1           | 1           | 1           |
| 2%                      | 2             | 2         | 2          | 2          | 2          | 2          | 2          | 2          | 2          | 1          | 1           | 1           | 1           |
| 3%                      | 3             | 3         | 3          | 3          | 3          | 2          | 2          | 2          | 2          | 2          | 2           | 2           | 2           |
| 4%                      | 4             | 4         | 4          | 4          | 3          | 3          | 3          | 3          | 3          | 3          | 3           | 2           | 2           |
| 5%                      | 5             | 5         | 5          | 4          | 4          | 4          | 4          | 4          | 4          | 4          | 3           | 3           | 3           |
| 6%                      | 6             | 6         | 6          | 5          | 5          | 5          | 5          | 5          | 5          | 4          | 4           | 4           | 3           |
| 7%                      | 7             | 7         | 6          | 6          | 6          | 6          | 6          | 6          | 5          | 5          | 5           | 4           | 4           |
| 8%                      | 8             | 8         | 8          | 7          | 7          | 7          | 7          | 6          | 6          | 6          | 6           | 5           | 5           |
| 9%                      | 9             | 9         | 8          | 8          | 8          | 8          | 8          | 7          | 7          | 7          | 6           | 6           | 5           |
| 10%                     | 10            | 10        | 10         | 9          | 9          | 9          | 8          | 8          | 8          | 7          | 7           | 6           | 6           |
| 11%                     | 11            | 11        | 11         | 10         | 10         | 10         | 9          | 9          | 9          | 8          | 8           | 7           | 6           |
| 12%                     | 12            | 12        | 12         | 11         | 11         | 11         | 10         | 10         | 10         | 9          | 8           | 8           | 7           |
| 13%                     | 14            | 13        | 13         | 12         | 12         | 12         | 11         | 11         | 10         | 10         | 9           | 9           | 8           |
| 14%                     | 15            | 14        | 14         | 13         | 13         | 13         | 12         | 12         | 11         | 11         | 10          | 9           | 8           |
| 15%                     | 16            | 16        | 15         | 14         | 14         | 14         | 13         | 13         | 12         | 12         | 11          | 10          | 9           |
| 16%                     | 17            | 17        | 16         | 16         | 15         | 15         | 14         | 14         | 13         | 12         | 12          | 11          | 10          |
| 17%                     | 19            | 18        | 17         | 17         | 16         | 16         | 15         | 15         | 14         | 13         | 12          | 12          | 10          |
| 18%                     | 20            | 19        | 19         | 18         | 17         | 17         | 16         | 16         | 15         | 14         | 13          | 12          | 11          |
| 19%                     | 21            | 21        | 20         | 19         | 18         | 18         | 17         | 17         | 16         | 15         | 14          | 13          | 12          |
| 20%                     | 23            | 22        | 21         | 20         | 20         | 19         | 18         | 18         | 17         | 16         | 15          | 14          | 12          |
| 21%                     | 24            | 23        | 22         | 22         | 21         | 20         | 19         | 19         | 18         | 17         | 16          | 15          | 13          |
| 22%                     | 25            | 25        | 24         | 23         | 22         | 21         | 21         | 20         | 19         | 18         | 17          | 15          | 14          |
| 23%                     | 27            | 26        | 25         | 24         | 23         | 22         | 22         | 21         | 20         | 19         | 18          | 16          | 15          |
| 24%                     | 28            | 27        | 26         | 25         | 24         | 24         | 23         | 22         | 21         | 20         | 18          | 17          | 15          |
| 25%                     | 30            | 29        | 28         | 27         | 26         | 25         | 24         | 23         | 22         | 21         | 19          | 18          | 16          |
| 26%                     | 31            | 30        | 29         | 28         | 27         | 26         | 25         | 24         | 23         | 22         | 20          | 19          | 17          |
| 27%                     | 33            | 32        | 31         | 29         | 28         | 27         | 26         | 25         | 24         | 23         | 21          | 20          | 18          |
| 28%                     | 35            | 34        | 32         | 31         | 30         | 29         | 28         | 26         | 25         | 24         | 22          | 20          | 18          |
| 29%                     | 36            | 35        | 34         | 32         | 31         | 30         | 29         | 28         | 26         | 25         | 23          | 21          | 19          |
| 30%                     | 38            | 37        | 35         | 34         | 33         | 31         | 30         | 29         | 27         | 26         | 24          | 22          | 20          |
| 31%                     | 40            | 39        | 37         | 35         | 34         | 33         | 31         | 30         | 29         | 27         | 25          | 23          | 21          |
| 32%                     | 42            | 40        | 38         | 37         | 36         | 34         | 33         | 31         | 30         | 28         | 26          | 24          | 22          |
| 33%                     | 44            | 42        | 40         | 39         | 37         | 36         | 34         | 33         | 31         | 29         | 27          | 25          | 22          |
| 34%                     | 45            | 44        | 42         | 40         | 39         | 37         | 36         | 34         | 32         | 30         | 28          | 26          | 23          |
| 35%                     | 47            | 46        | 44         | 42         | 40         | 39         | 37         | 35         | 34         | 32         | 29          | 27          | 24          |
| 36%                     | 49            | 48        | 46         | 44         | 42         | 40         | 39         | 37         | 35         | 33         | 31          | 28          | 25          |
| 37%                     | 52            | 50        | 47         | 45         | 43         | 42         | 40         | 38         | 36         | 34         | 32          | 29          | 26          |
| 38%                     | 54            | 52        | 49         | 47         | 45         | 43         | 42         | 40         | 38         | 35         | 33          | 30          | 27          |
| 39%                     | 56            | 54        | 51         | 49         | 47         | 45         | 43         | 41         | 39         | 37         | 34          | 31          | 28          |
| 40%                     | 58            | 56        | 53         | 51         | 49         | 47         | 45         | 43         | 40         | 38         | 35          | 32          | 29          |
| 41%                     | 60            | 58        | 55         | 53         | 51         | 49         | 46         | 44         | 42         | 39         | 36          | 33          | 29          |
| 42%                     | 63            | 60        | 57         | 55         | 53         | 50         | 48         | 46         | 43         | 41         | 37          | 34          | 30          |
| 43%                     | 65            | 63        | 60         | 57         | 54         | 52         | 50         | 47         | 45         | 42         | 39          | 35          | 31          |
| 44%                     | 68            | 65        | 62         | 59         | 56         | 54         | 52         | 49         | 46         | 43         | 40          | 36          | 32          |
| 45%                     | 71            | 68        | 64         | 61         | 58         | 56         | 53         | 51         | 48         | 45         | 41          | 37          | 33          |
| 46%                     | 73            | 70        | 67         | 63         | 61         | 58         | 55         | 52         | 49         | 46         | 43          | 39          | 34          |
| 47%                     | 76            | 73        | 69         | 66         | 63         | 60         | 57         | 54         | 51         | 48         | 44          | 40          | 35          |

|      |      |     |     |     |     |     |     |     |     |     |     |     |     |
|------|------|-----|-----|-----|-----|-----|-----|-----|-----|-----|-----|-----|-----|
| 48%  | 79   | 76  | 72  | 68  | 65  | 62  | 59  | 56  | 53  | 49  | 45  | 41  | 36  |
| 49%  | 82   | 78  | 74  | 70  | 67  | 64  | 61  | 58  | 55  | 51  | 47  | 42  | 37  |
| 50%  | 85   | 81  | 77  | 73  | 69  | 66  | 63  | 60  | 56  | 52  | 48  | 43  | 38  |
| 51%  | 88   | 84  | 80  | 76  | 72  | 69  | 65  | 62  | 58  | 54  | 49  | 45  | 39  |
| 52%  | 92   | 88  | 82  | 78  | 74  | 71  | 67  | 64  | 60  | 56  | 51  | 46  | 41  |
| 53%  | 95   | 91  | 85  | 81  | 77  | 73  | 69  | 66  | 62  | 57  | 52  | 47  | 42  |
| 54%  | 98   | 94  | 88  | 84  | 80  | 76  | 72  | 68  | 64  | 59  | 54  | 49  | 43  |
| 55%  | 102  | 97  | 91  | 87  | 82  | 78  | 74  | 70  | 66  | 61  | 56  | 50  | 44  |
| 56%  | 106  | 101 | 95  | 90  | 85  | 81  | 76  | 72  | 67  | 63  | 57  | 51  | 45  |
| 57%  | 110  | 105 | 98  | 93  | 88  | 83  | 79  | 74  | 70  | 64  | 59  | 53  | 46  |
| 58%  | 114  | 109 | 102 | 96  | 91  | 86  | 81  | 77  | 72  | 66  | 60  | 54  | 47  |
| 59%  | 118  | 112 | 105 | 99  | 94  | 89  | 84  | 79  | 74  | 68  | 62  | 56  | 49  |
| 60%  | 123  | 117 | 109 | 102 | 97  | 92  | 87  | 81  | 76  | 70  | 64  | 57  | 50  |
| 61%  | 128  | 121 | 113 | 106 | 100 | 95  | 89  | 84  | 78  | 72  | 66  | 59  | 51  |
| 62%  | 132  | 125 | 117 | 110 | 103 | 98  | 92  | 86  | 81  | 74  | 67  | 60  | 52  |
| 63%  | 138  | 130 | 121 | 113 | 107 | 101 | 95  | 89  | 83  | 76  | 69  | 62  | 54  |
| 64%  | 143  | 135 | 125 | 117 | 110 | 104 | 98  | 92  | 85  | 78  | 71  | 63  | 55  |
| 65%  | 148  | 140 | 130 | 121 | 114 | 108 | 101 | 95  | 88  | 81  | 73  | 65  | 56  |
| 66%  | 154  | 145 | 134 | 125 | 118 | 111 | 104 | 98  | 90  | 83  | 75  | 67  | 58  |
| 67%  | 160  | 151 | 139 | 130 | 122 | 115 | 108 | 100 | 93  | 85  | 77  | 68  | 59  |
| 68%  | 167  | 156 | 144 | 134 | 126 | 118 | 111 | 104 | 96  | 88  | 79  | 70  | 61  |
| 69%  | 173  | 163 | 150 | 139 | 130 | 122 | 115 | 107 | 99  | 90  | 81  | 72  | 62  |
| 70%  | 180  | 169 | 155 | 144 | 135 | 126 | 118 | 110 | 102 | 93  | 83  | 74  | 63  |
| 71%  | 188  | 176 | 161 | 149 | 139 | 130 | 122 | 113 | 104 | 95  | 86  | 76  | 65  |
| 72%  | 196  | 183 | 167 | 155 | 144 | 135 | 126 | 117 | 108 | 98  | 88  | 77  | 67  |
| 73%  | 204  | 190 | 173 | 160 | 149 | 139 | 130 | 120 | 111 | 101 | 90  | 79  | 68  |
| 74%  | 212  | 198 | 180 | 166 | 154 | 144 | 134 | 124 | 114 | 103 | 92  | 81  | 70  |
| 75%  | 222  | 206 | 187 | 172 | 160 | 149 | 138 | 128 | 117 | 106 | 95  | 83  | 71  |
| 76%  | 232  | 214 | 194 | 178 | 165 | 154 | 143 | 132 | 121 | 109 | 97  | 85  | 73  |
| 77%  | 242  | 224 | 202 | 185 | 171 | 159 | 147 | 136 | 124 | 112 | 100 | 88  | 75  |
| 78%  | 253  | 233 | 210 | 192 | 177 | 164 | 152 | 140 | 128 | 115 | 103 | 90  | 76  |
| 79%  | 265  | 243 | 218 | 200 | 184 | 170 | 157 | 145 | 132 | 119 | 105 | 92  | 78  |
| 80%  | 278  | 254 | 228 | 207 | 191 | 176 | 163 | 149 | 136 | 122 | 108 | 94  | 80  |
| 81%  | 291  | 266 | 237 | 216 | 198 | 182 | 168 | 154 | 140 | 125 | 111 | 97  | 82  |
| 82%  | 306  | 278 | 247 | 224 | 205 | 189 | 174 | 159 | 144 | 129 | 114 | 99  | 83  |
| 83%  | 321  | 292 | 258 | 233 | 213 | 196 | 180 | 164 | 149 | 133 | 117 | 101 | 85  |
| 84%  | 338  | 306 | 270 | 243 | 221 | 203 | 186 | 169 | 153 | 136 | 120 | 104 | 87  |
| 85%  | 357  | 321 | 282 | 253 | 230 | 210 | 192 | 175 | 158 | 140 | 123 | 106 | 89  |
| 86%  | 377  | 338 | 295 | 264 | 239 | 218 | 199 | 180 | 163 | 144 | 126 | 109 | 91  |
| 87%  | 399  | 356 | 309 | 275 | 249 | 226 | 206 | 186 | 168 | 149 | 130 | 112 | 93  |
| 88%  | 423  | 375 | 324 | 288 | 259 | 235 | 213 | 193 | 173 | 153 | 133 | 114 | 95  |
| 89%  | 449  | 396 | 340 | 301 | 270 | 244 | 221 | 199 | 178 | 157 | 137 | 117 | 98  |
| 90%  | 478  | 420 | 358 | 315 | 282 | 254 | 229 | 206 | 184 | 162 | 141 | 120 | 100 |
| 91%  | 511  | 445 | 377 | 330 | 294 | 264 | 238 | 213 | 190 | 167 | 144 | 123 | 102 |
| 92%  | 547  | 473 | 397 | 346 | 307 | 275 | 247 | 221 | 196 | 172 | 148 | 126 | 104 |
| 93%  | 588  | 504 | 420 | 363 | 321 | 287 | 257 | 229 | 203 | 177 | 152 | 129 | 107 |
| 94%  | 634  | 539 | 444 | 382 | 336 | 299 | 267 | 237 | 209 | 182 | 157 | 133 | 109 |
| 95%  | 687  | 577 | 471 | 403 | 352 | 312 | 277 | 246 | 216 | 188 | 161 | 136 | 111 |
| 96%  | 749  | 621 | 501 | 425 | 370 | 326 | 289 | 255 | 224 | 194 | 165 | 139 | 114 |
| 97%  | 820  | 671 | 534 | 449 | 389 | 341 | 301 | 265 | 231 | 200 | 170 | 143 | 117 |
| 98%  | 905  | 728 | 571 | 476 | 409 | 357 | 314 | 275 | 240 | 206 | 175 | 147 | 119 |
| 99%  | 1008 | 795 | 613 | 505 | 431 | 374 | 327 | 286 | 248 | 213 | 180 | 150 | 122 |
| 100% | 1133 | 873 | 660 | 538 | 455 | 393 | 342 | 297 | 257 | 220 | 185 | 154 | 125 |

**Supplementary Table S14.** Differences between AMs' consumption levels calculated by means of novel pediatric-adjusted methodology vs conventional ATC/DDD methodology for glycopeptides (base case), %

| Share /<br>Age<br>group | 1-11<br>month | 1<br>year | 2<br>years | 3<br>years | 4<br>years | 5<br>years | 6<br>years | 7<br>years | 8<br>years | 9<br>years | 10<br>years | 11<br>years | 12<br>years |
|-------------------------|---------------|-----------|------------|------------|------------|------------|------------|------------|------------|------------|-------------|-------------|-------------|
| 1%                      | 1             | 1         | 1          | 1          | 1          | 1          | 1          | 1          | 0          | 0          | 0           | 0           | 0           |
| 2%                      | 2             | 2         | 2          | 1          | 1          | 1          | 1          | 1          | 1          | 1          | 1           | 1           | 0           |
| 3%                      | 3             | 2         | 2          | 2          | 2          | 2          | 2          | 2          | 2          | 1          | 1           | 1           | 1           |
| 4%                      | 3             | 3         | 3          | 3          | 3          | 3          | 2          | 2          | 2          | 2          | 2           | 1           | 1           |
| 5%                      | 4             | 4         | 4          | 4          | 3          | 3          | 3          | 3          | 2          | 2          | 2           | 1           | 1           |
| 6%                      | 5             | 5         | 5          | 4          | 4          | 4          | 4          | 3          | 3          | 3          | 2           | 2           | 1           |
| 7%                      | 6             | 6         | 6          | 5          | 5          | 5          | 4          | 4          | 4          | 3          | 3           | 2           | 1           |
| 8%                      | 7             | 7         | 7          | 6          | 6          | 5          | 5          | 5          | 4          | 4          | 3           | 2           | 2           |
| 9%                      | 8             | 8         | 7          | 7          | 7          | 6          | 6          | 5          | 5          | 4          | 3           | 3           | 2           |
| 10%                     | 9             | 9         | 8          | 8          | 7          | 7          | 6          | 6          | 5          | 5          | 4           | 3           | 2           |
| 11%                     | 10            | 10        | 9          | 9          | 8          | 7          | 7          | 6          | 6          | 5          | 4           | 3           | 2           |
| 12%                     | 11            | 11        | 10         | 9          | 9          | 8          | 8          | 7          | 6          | 6          | 5           | 4           | 2           |
| 13%                     | 12            | 12        | 11         | 10         | 10         | 9          | 8          | 8          | 7          | 6          | 5           | 4           | 3           |
| 14%                     | 14            | 13        | 12         | 11         | 10         | 10         | 9          | 8          | 7          | 7          | 5           | 4           | 3           |
| 15%                     | 15            | 14        | 13         | 12         | 11         | 11         | 10         | 9          | 8          | 7          | 6           | 5           | 3           |
| 16%                     | 16            | 15        | 14         | 13         | 12         | 11         | 11         | 10         | 9          | 7          | 6           | 5           | 3           |
| 17%                     | 17            | 16        | 15         | 14         | 13         | 12         | 11         | 10         | 9          | 8          | 7           | 5           | 3           |
| 18%                     | 18            | 17        | 16         | 15         | 14         | 13         | 12         | 11         | 10         | 8          | 7           | 6           | 4           |
| 19%                     | 19            | 18        | 17         | 16         | 15         | 14         | 13         | 12         | 10         | 9          | 7           | 6           | 4           |
| 20%                     | 21            | 20        | 18         | 17         | 16         | 15         | 13         | 12         | 11         | 10         | 8           | 6           | 4           |
| 21%                     | 22            | 21        | 19         | 18         | 16         | 15         | 14         | 13         | 12         | 10         | 8           | 7           | 4           |
| 22%                     | 23            | 22        | 20         | 19         | 17         | 16         | 15         | 14         | 12         | 11         | 9           | 7           | 5           |
| 23%                     | 24            | 23        | 21         | 20         | 18         | 17         | 16         | 14         | 13         | 11         | 9           | 7           | 5           |
| 24%                     | 26            | 24        | 22         | 21         | 19         | 18         | 17         | 15         | 13         | 12         | 10          | 7           | 5           |
| 25%                     | 27            | 26        | 24         | 22         | 20         | 19         | 17         | 16         | 14         | 12         | 10          | 8           | 5           |
| 26%                     | 28            | 27        | 25         | 23         | 21         | 20         | 18         | 17         | 15         | 13         | 11          | 8           | 5           |
| 27%                     | 30            | 28        | 26         | 24         | 22         | 21         | 19         | 17         | 15         | 13         | 11          | 9           | 6           |
| 28%                     | 31            | 29        | 27         | 25         | 23         | 22         | 20         | 18         | 16         | 14         | 11          | 9           | 6           |
| 29%                     | 33            | 31        | 28         | 26         | 24         | 23         | 21         | 19         | 17         | 15         | 12          | 9           | 6           |
| 30%                     | 34            | 32        | 30         | 27         | 25         | 24         | 22         | 20         | 17         | 15         | 12          | 10          | 6           |
| 31%                     | 36            | 34        | 31         | 29         | 26         | 24         | 23         | 20         | 18         | 16         | 13          | 10          | 7           |
| 32%                     | 38            | 35        | 32         | 30         | 28         | 25         | 23         | 21         | 19         | 16         | 13          | 10          | 7           |
| 33%                     | 39            | 37        | 34         | 31         | 29         | 26         | 24         | 22         | 20         | 17         | 14          | 11          | 7           |
| 34%                     | 41            | 38        | 35         | 32         | 30         | 28         | 25         | 23         | 20         | 17         | 14          | 11          | 7           |
| 35%                     | 43            | 40        | 36         | 33         | 31         | 28         | 26         | 24         | 21         | 18         | 15          | 11          | 7           |
| 36%                     | 44            | 41        | 38         | 35         | 32         | 30         | 27         | 24         | 22         | 19         | 15          | 12          | 8           |
| 37%                     | 46            | 43        | 39         | 36         | 33         | 31         | 28         | 25         | 22         | 19         | 16          | 12          | 8           |
| 38%                     | 48            | 45        | 41         | 37         | 35         | 32         | 29         | 26         | 23         | 20         | 16          | 12          | 8           |
| 39%                     | 50            | 47        | 42         | 39         | 36         | 33         | 30         | 27         | 24         | 20         | 17          | 13          | 8           |
| 40%                     | 52            | 48        | 44         | 40         | 37         | 34         | 31         | 28         | 25         | 21         | 17          | 13          | 9           |
| 41%                     | 54            | 50        | 46         | 42         | 38         | 35         | 32         | 29         | 25         | 22         | 18          | 14          | 9           |
| 42%                     | 56            | 52        | 47         | 43         | 40         | 36         | 33         | 30         | 26         | 22         | 18          | 14          | 9           |
| 43%                     | 58            | 54        | 49         | 45         | 41         | 37         | 34         | 31         | 27         | 23         | 19          | 14          | 9           |
| 44%                     | 60            | 56        | 50         | 46         | 42         | 39         | 35         | 32         | 28         | 24         | 19          | 15          | 10          |
| 45%                     | 62            | 58        | 52         | 48         | 44         | 40         | 36         | 33         | 29         | 24         | 20          | 15          | 10          |
| 46%                     | 65            | 60        | 54         | 49         | 45         | 41         | 37         | 34         | 29         | 25         | 20          | 15          | 10          |
| 47%                     | 67            | 62        | 56         | 51         | 46         | 42         | 39         | 35         | 30         | 26         | 21          | 16          | 10          |

|      |     |     |     |     |     |     |     |     |    |    |    |    |    |
|------|-----|-----|-----|-----|-----|-----|-----|-----|----|----|----|----|----|
| 48%  | 69  | 64  | 58  | 53  | 48  | 44  | 40  | 36  | 31 | 27 | 21 | 16 | 11 |
| 49%  | 72  | 66  | 60  | 54  | 50  | 45  | 41  | 37  | 32 | 27 | 22 | 17 | 11 |
| 50%  | 74  | 69  | 62  | 56  | 51  | 46  | 42  | 38  | 33 | 28 | 23 | 17 | 11 |
| 51%  | 77  | 71  | 64  | 58  | 53  | 48  | 43  | 39  | 34 | 29 | 23 | 17 | 11 |
| 52%  | 80  | 73  | 66  | 59  | 54  | 49  | 45  | 40  | 35 | 29 | 24 | 18 | 11 |
| 53%  | 83  | 76  | 68  | 61  | 56  | 51  | 46  | 41  | 36 | 30 | 24 | 18 | 12 |
| 54%  | 85  | 79  | 70  | 63  | 57  | 52  | 47  | 42  | 37 | 31 | 25 | 19 | 12 |
| 55%  | 89  | 81  | 72  | 65  | 59  | 54  | 48  | 43  | 37 | 32 | 25 | 19 | 12 |
| 56%  | 92  | 84  | 75  | 67  | 61  | 55  | 50  | 44  | 38 | 32 | 26 | 20 | 12 |
| 57%  | 95  | 87  | 77  | 69  | 63  | 57  | 51  | 45  | 39 | 33 | 27 | 20 | 13 |
| 58%  | 98  | 90  | 79  | 71  | 64  | 58  | 52  | 46  | 40 | 34 | 27 | 20 | 13 |
| 59%  | 102 | 93  | 82  | 73  | 66  | 60  | 54  | 48  | 41 | 35 | 28 | 21 | 13 |
| 60%  | 105 | 96  | 84  | 76  | 68  | 62  | 55  | 49  | 42 | 36 | 28 | 21 | 14 |
| 61%  | 109 | 99  | 87  | 78  | 70  | 63  | 57  | 50  | 43 | 36 | 29 | 22 | 14 |
| 62%  | 112 | 102 | 90  | 80  | 72  | 65  | 58  | 51  | 44 | 37 | 30 | 22 | 14 |
| 63%  | 116 | 106 | 93  | 83  | 74  | 67  | 60  | 53  | 45 | 38 | 30 | 23 | 14 |
| 64%  | 120 | 109 | 95  | 85  | 76  | 68  | 61  | 54  | 46 | 39 | 31 | 23 | 15 |
| 65%  | 125 | 113 | 98  | 87  | 78  | 70  | 63  | 55  | 48 | 40 | 32 | 23 | 15 |
| 66%  | 129 | 116 | 101 | 90  | 80  | 72  | 64  | 56  | 49 | 41 | 32 | 24 | 15 |
| 67%  | 134 | 120 | 105 | 93  | 83  | 74  | 66  | 58  | 50 | 41 | 33 | 24 | 15 |
| 68%  | 138 | 124 | 108 | 95  | 85  | 76  | 67  | 59  | 51 | 42 | 33 | 25 | 16 |
| 69%  | 143 | 128 | 111 | 98  | 87  | 78  | 69  | 61  | 52 | 43 | 34 | 25 | 16 |
| 70%  | 149 | 133 | 115 | 101 | 90  | 80  | 71  | 62  | 53 | 44 | 35 | 26 | 16 |
| 71%  | 154 | 137 | 118 | 104 | 92  | 82  | 73  | 63  | 54 | 45 | 35 | 26 | 16 |
| 72%  | 160 | 142 | 122 | 107 | 95  | 84  | 74  | 65  | 55 | 46 | 36 | 27 | 17 |
| 73%  | 165 | 147 | 126 | 110 | 97  | 86  | 76  | 66  | 57 | 47 | 37 | 27 | 17 |
| 74%  | 172 | 152 | 130 | 113 | 100 | 89  | 78  | 68  | 58 | 48 | 37 | 28 | 17 |
| 75%  | 178 | 157 | 134 | 117 | 103 | 91  | 80  | 70  | 59 | 49 | 38 | 28 | 18 |
| 76%  | 185 | 163 | 138 | 120 | 106 | 93  | 82  | 71  | 60 | 50 | 39 | 28 | 18 |
| 77%  | 192 | 168 | 142 | 124 | 108 | 96  | 84  | 73  | 62 | 51 | 40 | 29 | 18 |
| 78%  | 199 | 174 | 147 | 127 | 111 | 98  | 86  | 74  | 63 | 52 | 40 | 29 | 18 |
| 79%  | 207 | 181 | 152 | 131 | 115 | 101 | 88  | 76  | 64 | 53 | 41 | 30 | 19 |
| 80%  | 216 | 187 | 157 | 135 | 118 | 103 | 90  | 78  | 66 | 54 | 42 | 30 | 19 |
| 81%  | 224 | 194 | 162 | 139 | 121 | 106 | 92  | 80  | 67 | 55 | 43 | 31 | 19 |
| 82%  | 234 | 201 | 167 | 143 | 124 | 109 | 95  | 81  | 68 | 56 | 43 | 31 | 20 |
| 83%  | 243 | 209 | 173 | 147 | 128 | 111 | 97  | 83  | 70 | 57 | 44 | 32 | 20 |
| 84%  | 254 | 217 | 178 | 152 | 131 | 114 | 99  | 85  | 71 | 58 | 45 | 33 | 20 |
| 85%  | 265 | 225 | 185 | 157 | 135 | 117 | 102 | 87  | 73 | 59 | 46 | 33 | 20 |
| 86%  | 276 | 234 | 191 | 161 | 139 | 120 | 104 | 89  | 74 | 60 | 46 | 33 | 21 |
| 87%  | 289 | 244 | 197 | 166 | 143 | 123 | 107 | 91  | 76 | 61 | 47 | 34 | 21 |
| 88%  | 302 | 254 | 204 | 172 | 147 | 127 | 109 | 93  | 77 | 62 | 48 | 35 | 21 |
| 89%  | 317 | 264 | 211 | 177 | 151 | 130 | 112 | 95  | 79 | 64 | 49 | 35 | 21 |
| 90%  | 332 | 275 | 219 | 183 | 155 | 133 | 114 | 97  | 81 | 65 | 50 | 36 | 22 |
| 91%  | 349 | 287 | 227 | 188 | 160 | 137 | 117 | 99  | 82 | 66 | 50 | 36 | 22 |
| 92%  | 366 | 300 | 235 | 194 | 164 | 140 | 120 | 101 | 84 | 67 | 51 | 37 | 22 |
| 93%  | 386 | 313 | 244 | 201 | 169 | 144 | 123 | 103 | 86 | 68 | 52 | 37 | 23 |
| 94%  | 407 | 327 | 254 | 207 | 174 | 148 | 126 | 106 | 87 | 70 | 53 | 38 | 23 |
| 95%  | 430 | 343 | 263 | 215 | 179 | 152 | 129 | 108 | 89 | 71 | 54 | 38 | 23 |
| 96%  | 455 | 359 | 274 | 222 | 185 | 156 | 132 | 111 | 91 | 72 | 55 | 39 | 24 |
| 97%  | 483 | 377 | 285 | 229 | 190 | 160 | 135 | 113 | 93 | 74 | 56 | 39 | 24 |
| 98%  | 513 | 397 | 296 | 237 | 196 | 165 | 139 | 115 | 94 | 75 | 57 | 40 | 24 |
| 99%  | 547 | 418 | 309 | 246 | 202 | 169 | 142 | 118 | 96 | 76 | 58 | 41 | 24 |
| 100% | 585 | 440 | 322 | 254 | 209 | 174 | 146 | 121 | 98 | 78 | 58 | 41 | 25 |

**Supplementary Table S15.** Differences between AMs' consumption levels calculated by means of novel pediatric-adjusted methodology vs conventional ATC/DDD methodology for co-trimoxazole (base case), %

| Share /<br>Age<br>group | 1-11<br>month | 1<br>year | 2<br>years | 3<br>years | 4<br>years | 5<br>years | 6<br>years | 7<br>years | 8<br>years | 9<br>years | 10<br>years | 11<br>years | 12<br>years |
|-------------------------|---------------|-----------|------------|------------|------------|------------|------------|------------|------------|------------|-------------|-------------|-------------|
| 1%                      | 1             | 1         | 1          | 1          | 1          | 1          | 1          | 1          | 1          | 0          | 0           | 0           | 0           |
| 2%                      | 2             | 2         | 1          | 1          | 1          | 1          | 1          | 1          | 1          | 1          | 1           | 1           | 1           |
| 3%                      | 3             | 3         | 2          | 2          | 2          | 2          | 2          | 2          | 2          | 1          | 1           | 1           | 1           |
| 4%                      | 4             | 3         | 3          | 3          | 3          | 3          | 3          | 2          | 2          | 2          | 2           | 1           | 1           |
| 5%                      | 5             | 4         | 4          | 4          | 4          | 3          | 3          | 3          | 3          | 2          | 2           | 2           | 1           |
| 6%                      | 5             | 5         | 5          | 5          | 4          | 4          | 4          | 4          | 3          | 3          | 3           | 2           | 1           |
| 7%                      | 6             | 6         | 6          | 5          | 5          | 5          | 5          | 4          | 4          | 3          | 3           | 2           | 2           |
| 8%                      | 7             | 7         | 6          | 6          | 6          | 6          | 5          | 5          | 4          | 4          | 3           | 3           | 2           |
| 9%                      | 8             | 8         | 7          | 7          | 7          | 6          | 6          | 5          | 5          | 4          | 4           | 3           | 2           |
| 10%                     | 9             | 9         | 8          | 8          | 7          | 7          | 6          | 6          | 6          | 5          | 4           | 3           | 3           |
| 11%                     | 10            | 10        | 9          | 9          | 8          | 8          | 7          | 7          | 6          | 5          | 5           | 4           | 3           |
| 12%                     | 12            | 11        | 10         | 10         | 9          | 8          | 8          | 7          | 7          | 6          | 5           | 4           | 3           |
| 13%                     | 13            | 12        | 11         | 10         | 10         | 9          | 9          | 8          | 7          | 6          | 6           | 5           | 3           |
| 14%                     | 14            | 13        | 12         | 11         | 11         | 10         | 9          | 9          | 8          | 7          | 6           | 5           | 4           |
| 15%                     | 15            | 14        | 13         | 12         | 12         | 11         | 10         | 9          | 8          | 8          | 6           | 5           | 4           |
| 16%                     | 16            | 15        | 14         | 13         | 12         | 12         | 11         | 10         | 9          | 8          | 7           | 6           | 4           |
| 17%                     | 17            | 16        | 15         | 14         | 13         | 12         | 12         | 11         | 10         | 9          | 7           | 6           | 4           |
| 18%                     | 18            | 18        | 16         | 15         | 14         | 13         | 12         | 12         | 10         | 9          | 8           | 6           | 5           |
| 19%                     | 19            | 19        | 17         | 16         | 15         | 14         | 13         | 12         | 11         | 10         | 8           | 7           | 5           |
| 20%                     | 21            | 20        | 18         | 17         | 16         | 15         | 14         | 13         | 12         | 10         | 9           | 7           | 5           |
| 21%                     | 22            | 21        | 19         | 18         | 17         | 16         | 15         | 14         | 12         | 11         | 9           | 8           | 5           |
| 22%                     | 23            | 22        | 21         | 19         | 18         | 17         | 16         | 14         | 13         | 12         | 10          | 8           | 6           |
| 23%                     | 25            | 23        | 22         | 20         | 19         | 18         | 17         | 15         | 14         | 12         | 10          | 8           | 6           |
| 24%                     | 26            | 25        | 23         | 21         | 20         | 19         | 17         | 16         | 14         | 13         | 11          | 9           | 6           |
| 25%                     | 27            | 26        | 24         | 22         | 21         | 20         | 18         | 17         | 15         | 13         | 11          | 9           | 7           |
| 26%                     | 29            | 27        | 25         | 24         | 22         | 21         | 19         | 18         | 16         | 14         | 12          | 10          | 7           |
| 27%                     | 30            | 29        | 27         | 25         | 23         | 21         | 20         | 18         | 17         | 15         | 12          | 10          | 7           |
| 28%                     | 32            | 30        | 28         | 26         | 24         | 23         | 21         | 19         | 17         | 15         | 13          | 10          | 7           |
| 29%                     | 33            | 31        | 29         | 27         | 25         | 23         | 22         | 20         | 18         | 16         | 13          | 11          | 8           |
| 30%                     | 35            | 33        | 30         | 28         | 26         | 25         | 23         | 21         | 19         | 16         | 14          | 11          | 8           |
| 31%                     | 36            | 34        | 32         | 29         | 27         | 26         | 24         | 22         | 19         | 17         | 14          | 12          | 8           |
| 32%                     | 38            | 36        | 33         | 31         | 29         | 27         | 25         | 23         | 20         | 18         | 15          | 12          | 9           |
| 33%                     | 40            | 37        | 34         | 32         | 30         | 28         | 26         | 23         | 21         | 18         | 16          | 12          | 9           |
| 34%                     | 42            | 39        | 36         | 33         | 31         | 29         | 27         | 24         | 22         | 19         | 16          | 13          | 9           |
| 35%                     | 43            | 41        | 37         | 35         | 32         | 30         | 28         | 25         | 23         | 20         | 17          | 13          | 10          |
| 36%                     | 45            | 42        | 39         | 36         | 33         | 31         | 29         | 26         | 23         | 20         | 17          | 14          | 10          |
| 37%                     | 47            | 44        | 40         | 37         | 35         | 32         | 30         | 27         | 24         | 21         | 18          | 14          | 10          |
| 38%                     | 49            | 46        | 42         | 39         | 36         | 33         | 31         | 28         | 25         | 22         | 18          | 15          | 10          |
| 39%                     | 51            | 47        | 44         | 40         | 37         | 34         | 32         | 29         | 26         | 23         | 19          | 15          | 11          |
| 40%                     | 53            | 49        | 45         | 42         | 39         | 36         | 33         | 30         | 27         | 23         | 19          | 16          | 11          |
| 41%                     | 55            | 51        | 47         | 43         | 40         | 37         | 34         | 31         | 28         | 24         | 20          | 16          | 11          |
| 42%                     | 57            | 53        | 48         | 45         | 41         | 38         | 35         | 32         | 28         | 25         | 21          | 16          | 12          |
| 43%                     | 59            | 55        | 50         | 46         | 43         | 39         | 36         | 33         | 29         | 25         | 21          | 17          | 12          |
| 44%                     | 61            | 57        | 52         | 48         | 44         | 41         | 37         | 34         | 30         | 26         | 22          | 17          | 12          |
| 45%                     | 63            | 59        | 54         | 49         | 45         | 42         | 38         | 35         | 31         | 27         | 22          | 18          | 13          |
| 46%                     | 66            | 61        | 56         | 51         | 47         | 43         | 40         | 36         | 32         | 28         | 23          | 18          | 13          |
| 47%                     | 68            | 64        | 58         | 53         | 49         | 45         | 41         | 37         | 33         | 29         | 24          | 19          | 13          |



|      |     |     |     |     |     |     |     |     |     |    |    |    |    |
|------|-----|-----|-----|-----|-----|-----|-----|-----|-----|----|----|----|----|
| 48%  | 71  | 66  | 60  | 55  | 50  | 46  | 42  | 38  | 34  | 29 | 24 | 19 | 14 |
| 49%  | 73  | 68  | 62  | 56  | 52  | 47  | 43  | 39  | 35  | 30 | 25 | 20 | 14 |
| 50%  | 76  | 70  | 64  | 58  | 53  | 49  | 45  | 40  | 36  | 31 | 26 | 20 | 14 |
| 51%  | 79  | 73  | 66  | 60  | 55  | 50  | 46  | 42  | 37  | 32 | 26 | 21 | 14 |
| 52%  | 81  | 75  | 68  | 62  | 57  | 52  | 47  | 43  | 38  | 32 | 27 | 21 | 15 |
| 53%  | 84  | 78  | 70  | 64  | 58  | 53  | 49  | 44  | 39  | 33 | 28 | 22 | 15 |
| 54%  | 87  | 81  | 72  | 66  | 60  | 55  | 50  | 45  | 40  | 34 | 28 | 22 | 16 |
| 55%  | 90  | 83  | 75  | 68  | 62  | 57  | 51  | 46  | 41  | 35 | 29 | 23 | 16 |
| 56%  | 94  | 86  | 77  | 70  | 64  | 58  | 53  | 47  | 42  | 36 | 30 | 23 | 16 |
| 57%  | 97  | 89  | 80  | 72  | 66  | 60  | 54  | 49  | 43  | 37 | 30 | 24 | 16 |
| 58%  | 100 | 92  | 82  | 74  | 68  | 62  | 56  | 50  | 44  | 38 | 31 | 24 | 17 |
| 59%  | 104 | 95  | 85  | 77  | 70  | 63  | 57  | 51  | 45  | 39 | 32 | 25 | 17 |
| 60%  | 107 | 98  | 87  | 79  | 72  | 65  | 59  | 53  | 46  | 40 | 32 | 25 | 18 |
| 61%  | 111 | 102 | 90  | 81  | 74  | 67  | 60  | 54  | 47  | 40 | 33 | 26 | 18 |
| 62%  | 115 | 105 | 93  | 84  | 76  | 69  | 62  | 55  | 49  | 41 | 34 | 26 | 18 |
| 63%  | 119 | 108 | 96  | 86  | 78  | 71  | 64  | 57  | 50  | 42 | 35 | 27 | 19 |
| 64%  | 123 | 112 | 99  | 89  | 80  | 73  | 65  | 58  | 51  | 43 | 35 | 27 | 19 |
| 65%  | 128 | 116 | 102 | 92  | 83  | 75  | 67  | 60  | 52  | 44 | 36 | 28 | 19 |
| 66%  | 132 | 120 | 105 | 94  | 85  | 77  | 69  | 61  | 53  | 45 | 37 | 29 | 20 |
| 67%  | 137 | 124 | 109 | 97  | 87  | 79  | 71  | 63  | 55  | 46 | 38 | 29 | 20 |
| 68%  | 142 | 128 | 112 | 100 | 90  | 81  | 72  | 64  | 56  | 47 | 38 | 30 | 20 |
| 69%  | 147 | 133 | 116 | 103 | 92  | 83  | 74  | 66  | 57  | 48 | 39 | 30 | 21 |
| 70%  | 153 | 137 | 119 | 106 | 95  | 85  | 76  | 67  | 58  | 49 | 40 | 31 | 21 |
| 71%  | 158 | 142 | 123 | 109 | 98  | 88  | 78  | 69  | 60  | 50 | 41 | 31 | 21 |
| 72%  | 164 | 147 | 127 | 112 | 101 | 90  | 80  | 71  | 61  | 51 | 42 | 32 | 22 |
| 73%  | 170 | 152 | 131 | 116 | 103 | 92  | 82  | 72  | 63  | 53 | 42 | 32 | 22 |
| 74%  | 177 | 157 | 135 | 119 | 106 | 95  | 84  | 74  | 64  | 54 | 43 | 33 | 23 |
| 75%  | 183 | 163 | 140 | 123 | 109 | 97  | 86  | 76  | 65  | 55 | 44 | 34 | 23 |
| 76%  | 190 | 169 | 144 | 127 | 112 | 100 | 89  | 78  | 67  | 56 | 45 | 34 | 23 |
| 77%  | 198 | 175 | 149 | 131 | 116 | 103 | 91  | 79  | 68  | 57 | 46 | 35 | 24 |
| 78%  | 206 | 181 | 154 | 134 | 119 | 105 | 93  | 81  | 70  | 58 | 47 | 36 | 24 |
| 79%  | 214 | 188 | 159 | 139 | 122 | 108 | 95  | 83  | 71  | 59 | 47 | 36 | 24 |
| 80%  | 223 | 195 | 164 | 143 | 126 | 111 | 98  | 85  | 73  | 61 | 48 | 37 | 25 |
| 81%  | 232 | 203 | 170 | 147 | 129 | 114 | 100 | 87  | 75  | 62 | 49 | 37 | 25 |
| 82%  | 242 | 210 | 176 | 152 | 133 | 117 | 103 | 89  | 76  | 63 | 50 | 38 | 26 |
| 83%  | 252 | 218 | 182 | 156 | 137 | 120 | 105 | 91  | 78  | 64 | 51 | 39 | 26 |
| 84%  | 263 | 227 | 188 | 162 | 141 | 123 | 108 | 94  | 79  | 66 | 52 | 39 | 26 |
| 85%  | 275 | 236 | 195 | 167 | 145 | 127 | 111 | 96  | 81  | 67 | 53 | 40 | 27 |
| 86%  | 288 | 246 | 202 | 172 | 149 | 130 | 113 | 98  | 83  | 68 | 54 | 41 | 27 |
| 87%  | 301 | 256 | 209 | 177 | 154 | 134 | 116 | 100 | 85  | 70 | 55 | 41 | 28 |
| 88%  | 316 | 267 | 217 | 183 | 158 | 137 | 119 | 103 | 87  | 71 | 56 | 42 | 28 |
| 89%  | 331 | 278 | 225 | 189 | 163 | 141 | 122 | 105 | 88  | 72 | 57 | 43 | 28 |
| 90%  | 348 | 290 | 233 | 196 | 168 | 145 | 125 | 107 | 90  | 74 | 58 | 43 | 29 |
| 91%  | 366 | 303 | 242 | 202 | 173 | 149 | 129 | 110 | 92  | 75 | 59 | 44 | 29 |
| 92%  | 385 | 317 | 251 | 209 | 178 | 153 | 132 | 112 | 94  | 77 | 60 | 45 | 30 |
| 93%  | 406 | 332 | 261 | 216 | 184 | 157 | 135 | 115 | 96  | 78 | 61 | 45 | 30 |
| 94%  | 430 | 348 | 271 | 224 | 189 | 162 | 139 | 118 | 98  | 80 | 62 | 46 | 31 |
| 95%  | 455 | 365 | 282 | 232 | 195 | 166 | 142 | 121 | 100 | 81 | 63 | 47 | 31 |
| 96%  | 483 | 384 | 294 | 240 | 201 | 171 | 146 | 123 | 103 | 83 | 64 | 48 | 31 |
| 97%  | 514 | 404 | 307 | 249 | 208 | 176 | 150 | 126 | 105 | 84 | 66 | 48 | 32 |
| 98%  | 548 | 426 | 320 | 258 | 215 | 181 | 154 | 129 | 107 | 86 | 67 | 49 | 32 |
| 99%  | 586 | 450 | 334 | 268 | 222 | 187 | 158 | 132 | 109 | 88 | 68 | 50 | 33 |
| 100% | 630 | 476 | 349 | 278 | 229 | 192 | 162 | 136 | 112 | 90 | 69 | 51 | 33 |

**Supplementary Table S16.** Differences between AMs' consumption levels calculated by means of novel pediatric-adjusted methodology vs conventional ATC/DDD methodology for nitroimidazoles (base case), %

| Share /<br>Age<br>group | 1-11<br>month | 1<br>year | 2<br>years | 3<br>years | 4<br>years | 5<br>years | 6<br>years | 7<br>years | 8<br>years | 9<br>years | 10<br>years | 11<br>years | 12<br>years |
|-------------------------|---------------|-----------|------------|------------|------------|------------|------------|------------|------------|------------|-------------|-------------|-------------|
| 1%                      | 1             | 1         | 1          | 1          | 1          | 1          | 1          | 1          | 1          | 1          | 1           | 1           | 1           |
| 2%                      | 2             | 2         | 2          | 2          | 2          | 1          | 1          | 1          | 1          | 1          | 1           | 1           | 1           |
| 3%                      | 3             | 3         | 3          | 2          | 2          | 2          | 2          | 2          | 2          | 2          | 2           | 2           | 2           |
| 4%                      | 4             | 4         | 3          | 3          | 3          | 3          | 3          | 3          | 3          | 3          | 3           | 3           | 2           |
| 5%                      | 5             | 5         | 4          | 4          | 4          | 4          | 4          | 4          | 4          | 3          | 3           | 3           | 3           |
| 6%                      | 6             | 5         | 5          | 5          | 5          | 5          | 5          | 4          | 4          | 4          | 4           | 4           | 4           |
| 7%                      | 7             | 6         | 6          | 6          | 6          | 5          | 5          | 5          | 5          | 5          | 5           | 5           | 4           |
| 8%                      | 8             | 7         | 7          | 7          | 6          | 6          | 6          | 6          | 6          | 6          | 5           | 5           | 5           |
| 9%                      | 9             | 8         | 8          | 8          | 7          | 7          | 7          | 7          | 7          | 6          | 6           | 6           | 6           |
| 10%                     | 10            | 9         | 9          | 9          | 8          | 8          | 8          | 8          | 7          | 7          | 7           | 7           | 6           |
| 11%                     | 11            | 11        | 10         | 9          | 9          | 9          | 9          | 8          | 8          | 8          | 8           | 7           | 7           |
| 12%                     | 12            | 12        | 11         | 11         | 10         | 10         | 10         | 9          | 9          | 9          | 8           | 8           | 8           |
| 13%                     | 13            | 13        | 12         | 11         | 11         | 10         | 10         | 10         | 10         | 10         | 9           | 9           | 8           |
| 14%                     | 14            | 14        | 13         | 12         | 12         | 11         | 11         | 11         | 11         | 10         | 10          | 10          | 9           |
| 15%                     | 15            | 15        | 14         | 13         | 13         | 12         | 12         | 12         | 12         | 11         | 11          | 10          | 10          |
| 16%                     | 17            | 16        | 15         | 14         | 14         | 13         | 13         | 13         | 12         | 12         | 12          | 11          | 10          |
| 17%                     | 18            | 17        | 16         | 16         | 15         | 14         | 14         | 14         | 13         | 13         | 12          | 12          | 11          |
| 18%                     | 19            | 18        | 17         | 17         | 16         | 15         | 15         | 15         | 14         | 14         | 13          | 13          | 12          |
| 19%                     | 20            | 20        | 19         | 18         | 17         | 16         | 16         | 16         | 15         | 15         | 14          | 13          | 13          |
| 20%                     | 22            | 21        | 20         | 19         | 18         | 17         | 17         | 17         | 16         | 16         | 15          | 14          | 13          |
| 21%                     | 23            | 22        | 21         | 20         | 19         | 18         | 18         | 17         | 17         | 16         | 16          | 15          | 14          |
| 22%                     | 24            | 23        | 22         | 21         | 20         | 19         | 19         | 18         | 18         | 17         | 17          | 16          | 15          |
| 23%                     | 26            | 25        | 23         | 22         | 21         | 20         | 20         | 19         | 19         | 18         | 18          | 17          | 16          |
| 24%                     | 27            | 26        | 25         | 23         | 22         | 21         | 21         | 21         | 20         | 19         | 18          | 18          | 17          |
| 25%                     | 29            | 27        | 26         | 25         | 23         | 22         | 22         | 22         | 21         | 20         | 19          | 19          | 17          |
| 26%                     | 30            | 29        | 27         | 26         | 25         | 23         | 23         | 23         | 22         | 21         | 20          | 19          | 18          |
| 27%                     | 32            | 30        | 29         | 27         | 26         | 24         | 24         | 24         | 23         | 22         | 21          | 20          | 19          |
| 28%                     | 33            | 32        | 30         | 28         | 27         | 25         | 25         | 25         | 24         | 23         | 22          | 21          | 20          |
| 29%                     | 35            | 33        | 31         | 30         | 28         | 27         | 27         | 26         | 25         | 24         | 23          | 22          | 21          |
| 30%                     | 36            | 35        | 33         | 31         | 29         | 28         | 28         | 27         | 26         | 25         | 24          | 23          | 22          |
| 31%                     | 38            | 36        | 34         | 32         | 31         | 29         | 29         | 28         | 27         | 26         | 25          | 24          | 23          |
| 32%                     | 40            | 38        | 36         | 34         | 32         | 30         | 30         | 29         | 28         | 27         | 26          | 25          | 24          |
| 33%                     | 42            | 40        | 37         | 35         | 33         | 32         | 31         | 31         | 30         | 29         | 27          | 26          | 25          |
| 34%                     | 43            | 41        | 39         | 37         | 35         | 33         | 33         | 32         | 31         | 30         | 28          | 27          | 26          |
| 35%                     | 45            | 43        | 40         | 38         | 36         | 34         | 34         | 33         | 32         | 31         | 30          | 28          | 27          |
| 36%                     | 47            | 45        | 42         | 40         | 37         | 35         | 35         | 34         | 33         | 32         | 31          | 29          | 28          |
| 37%                     | 49            | 47        | 44         | 41         | 39         | 37         | 37         | 36         | 34         | 33         | 32          | 30          | 29          |
| 38%                     | 51            | 49        | 45         | 43         | 40         | 38         | 38         | 37         | 36         | 34         | 33          | 31          | 30          |
| 39%                     | 53            | 51        | 47         | 44         | 42         | 40         | 39         | 38         | 37         | 36         | 34          | 33          | 31          |
| 40%                     | 55            | 53        | 49         | 46         | 43         | 41         | 41         | 40         | 38         | 37         | 35          | 34          | 32          |
| 41%                     | 58            | 55        | 51         | 48         | 45         | 42         | 42         | 41         | 40         | 38         | 37          | 35          | 33          |
| 42%                     | 60            | 57        | 53         | 50         | 47         | 44         | 44         | 42         | 41         | 39         | 38          | 36          | 34          |
| 43%                     | 62            | 59        | 55         | 51         | 48         | 45         | 45         | 44         | 42         | 41         | 39          | 37          | 35          |
| 44%                     | 64            | 61        | 57         | 53         | 50         | 47         | 47         | 45         | 44         | 42         | 40          | 38          | 36          |
| 45%                     | 67            | 63        | 59         | 55         | 52         | 49         | 48         | 47         | 45         | 44         | 42          | 40          | 37          |
| 46%                     | 69            | 66        | 61         | 57         | 53         | 50         | 50         | 48         | 47         | 45         | 43          | 41          | 39          |
| 47%                     | 72            | 68        | 63         | 59         | 55         | 52         | 52         | 50         | 48         | 46         | 44          | 42          | 40          |



|      |     |     |     |     |     |     |     |     |     |     |     |     |     |
|------|-----|-----|-----|-----|-----|-----|-----|-----|-----|-----|-----|-----|-----|
| 48%  | 75  | 71  | 65  | 61  | 57  | 53  | 53  | 52  | 50  | 48  | 46  | 44  | 41  |
| 49%  | 77  | 73  | 67  | 63  | 59  | 55  | 55  | 53  | 51  | 49  | 47  | 45  | 42  |
| 50%  | 80  | 76  | 70  | 65  | 61  | 57  | 57  | 55  | 53  | 51  | 49  | 46  | 44  |
| 51%  | 83  | 78  | 72  | 67  | 63  | 59  | 59  | 57  | 55  | 53  | 50  | 48  | 45  |
| 52%  | 86  | 81  | 75  | 70  | 65  | 61  | 61  | 59  | 56  | 54  | 52  | 49  | 46  |
| 53%  | 89  | 84  | 77  | 72  | 67  | 63  | 62  | 60  | 58  | 56  | 53  | 51  | 48  |
| 54%  | 93  | 87  | 80  | 74  | 69  | 64  | 64  | 62  | 60  | 58  | 55  | 52  | 49  |
| 55%  | 96  | 90  | 83  | 77  | 71  | 67  | 66  | 64  | 62  | 59  | 57  | 54  | 51  |
| 56%  | 100 | 93  | 85  | 79  | 74  | 69  | 68  | 66  | 64  | 61  | 58  | 55  | 52  |
| 57%  | 103 | 96  | 88  | 82  | 76  | 71  | 70  | 68  | 65  | 63  | 60  | 57  | 54  |
| 58%  | 107 | 100 | 91  | 84  | 78  | 73  | 73  | 70  | 67  | 65  | 62  | 59  | 55  |
| 59%  | 111 | 103 | 94  | 87  | 81  | 75  | 75  | 72  | 69  | 67  | 63  | 60  | 57  |
| 60%  | 115 | 107 | 97  | 90  | 83  | 77  | 77  | 74  | 71  | 68  | 65  | 62  | 58  |
| 61%  | 119 | 111 | 101 | 93  | 86  | 80  | 79  | 76  | 74  | 70  | 67  | 64  | 60  |
| 62%  | 123 | 115 | 104 | 96  | 89  | 82  | 82  | 79  | 76  | 72  | 69  | 66  | 62  |
| 63%  | 128 | 119 | 107 | 99  | 91  | 84  | 84  | 81  | 78  | 75  | 71  | 67  | 64  |
| 64%  | 133 | 123 | 111 | 102 | 94  | 87  | 87  | 83  | 80  | 77  | 73  | 69  | 65  |
| 65%  | 137 | 127 | 115 | 105 | 97  | 89  | 89  | 86  | 82  | 79  | 75  | 71  | 67  |
| 66%  | 143 | 132 | 119 | 109 | 100 | 92  | 92  | 88  | 85  | 81  | 77  | 73  | 69  |
| 67%  | 148 | 136 | 123 | 112 | 103 | 95  | 94  | 91  | 87  | 83  | 79  | 75  | 71  |
| 68%  | 154 | 141 | 127 | 116 | 106 | 97  | 97  | 94  | 90  | 86  | 82  | 77  | 73  |
| 69%  | 159 | 147 | 131 | 119 | 109 | 100 | 100 | 96  | 92  | 88  | 84  | 80  | 75  |
| 70%  | 166 | 152 | 136 | 123 | 113 | 103 | 103 | 99  | 95  | 91  | 86  | 82  | 77  |
| 71%  | 172 | 157 | 140 | 127 | 116 | 106 | 106 | 102 | 98  | 93  | 89  | 84  | 79  |
| 72%  | 179 | 163 | 145 | 131 | 120 | 110 | 109 | 105 | 101 | 96  | 91  | 87  | 82  |
| 73%  | 186 | 169 | 150 | 136 | 124 | 113 | 113 | 108 | 103 | 99  | 94  | 89  | 84  |
| 74%  | 193 | 176 | 155 | 140 | 128 | 116 | 116 | 111 | 106 | 101 | 96  | 91  | 86  |
| 75%  | 201 | 183 | 161 | 145 | 132 | 120 | 119 | 114 | 109 | 104 | 99  | 94  | 89  |
| 76%  | 210 | 190 | 167 | 150 | 136 | 123 | 123 | 118 | 113 | 107 | 102 | 97  | 91  |
| 77%  | 218 | 197 | 172 | 155 | 140 | 127 | 127 | 121 | 116 | 110 | 105 | 99  | 94  |
| 78%  | 228 | 205 | 179 | 160 | 144 | 131 | 130 | 125 | 119 | 114 | 108 | 102 | 96  |
| 79%  | 237 | 213 | 185 | 165 | 149 | 135 | 134 | 128 | 123 | 117 | 111 | 105 | 99  |
| 80%  | 248 | 222 | 192 | 171 | 154 | 139 | 138 | 132 | 126 | 120 | 114 | 108 | 102 |
| 81%  | 259 | 231 | 199 | 177 | 159 | 143 | 143 | 136 | 130 | 124 | 117 | 111 | 105 |
| 82%  | 271 | 241 | 207 | 183 | 164 | 147 | 147 | 140 | 134 | 127 | 121 | 115 | 108 |
| 83%  | 284 | 251 | 215 | 190 | 169 | 152 | 152 | 145 | 138 | 131 | 124 | 118 | 111 |
| 84%  | 297 | 262 | 223 | 196 | 175 | 156 | 156 | 149 | 142 | 135 | 128 | 121 | 115 |
| 85%  | 312 | 273 | 232 | 203 | 181 | 161 | 161 | 153 | 146 | 139 | 132 | 125 | 118 |
| 86%  | 327 | 286 | 241 | 211 | 187 | 166 | 166 | 158 | 151 | 143 | 136 | 129 | 121 |
| 87%  | 344 | 299 | 251 | 219 | 193 | 172 | 172 | 163 | 155 | 147 | 140 | 132 | 125 |
| 88%  | 363 | 313 | 261 | 227 | 200 | 177 | 177 | 168 | 160 | 152 | 144 | 137 | 129 |
| 89%  | 382 | 328 | 273 | 236 | 207 | 183 | 183 | 174 | 165 | 157 | 148 | 141 | 133 |
| 90%  | 404 | 345 | 284 | 245 | 214 | 189 | 189 | 179 | 170 | 161 | 153 | 145 | 137 |
| 91%  | 428 | 363 | 297 | 254 | 222 | 195 | 195 | 185 | 176 | 167 | 158 | 150 | 141 |
| 92%  | 454 | 382 | 310 | 264 | 230 | 201 | 201 | 191 | 181 | 172 | 163 | 154 | 146 |
| 93%  | 483 | 403 | 325 | 275 | 238 | 208 | 208 | 197 | 187 | 177 | 168 | 159 | 151 |
| 94%  | 514 | 425 | 340 | 287 | 247 | 215 | 215 | 204 | 193 | 183 | 173 | 164 | 156 |
| 95%  | 550 | 450 | 356 | 299 | 257 | 222 | 223 | 211 | 200 | 189 | 179 | 170 | 161 |
| 96%  | 590 | 478 | 374 | 312 | 266 | 230 | 231 | 218 | 206 | 195 | 185 | 176 | 166 |
| 97%  | 635 | 508 | 393 | 326 | 277 | 238 | 239 | 226 | 214 | 202 | 191 | 182 | 172 |
| 98%  | 687 | 542 | 414 | 340 | 288 | 247 | 248 | 234 | 221 | 209 | 198 | 188 | 178 |
| 99%  | 746 | 579 | 437 | 356 | 300 | 256 | 257 | 242 | 229 | 216 | 205 | 194 | 185 |
| 100% | 815 | 621 | 462 | 373 | 312 | 265 | 266 | 251 | 237 | 224 | 212 | 202 | 191 |

**Supplementary Table S17.** Differences between AMs' consumption levels calculated by means of novel pediatric-adjusted methodology vs conventional ATC/DDD methodology for fosfomycin (base case), %

| Share /<br>Age<br>group | 1-11<br>month | 1<br>year | 2<br>years | 3<br>years | 4<br>years | 5<br>years | 6<br>years | 7<br>years | 8<br>years | 9<br>years | 10<br>years | 11<br>years | 12<br>years |
|-------------------------|---------------|-----------|------------|------------|------------|------------|------------|------------|------------|------------|-------------|-------------|-------------|
| 1%                      | 1             | 1         | 1          | 1          | 1          | 0          | 0          | 0          | 0          | 0          | 0           | 0           | 0           |
| 2%                      | 2             | 1         | 1          | 1          | 1          | 1          | 0          | 0          | 0          | 0          | 0           | 0           | 0           |
| 3%                      | 2             | 2         | 2          | 1          | 1          | 1          | 0          | 0          | 0          | 0          | 0           | 0           | 0           |
| 4%                      | 3             | 2         | 2          | 2          | 1          | 1          | 0          | 0          | 0          | 0          | 0           | 0           | 0           |
| 5%                      | 3             | 3         | 2          | 2          | 1          | 1          | 0          | 0          | 0          | 0          | 0           | 0           | 0           |
| 6%                      | 4             | 3         | 3          | 2          | 1          | 1          | 0          | 0          | 0          | 0          | 0           | 0           | 0           |
| 7%                      | 5             | 4         | 3          | 2          | 2          | 2          | 1          | 1          | 1          | 1          | 1           | 1           | 1           |
| 8%                      | 5             | 5         | 4          | 3          | 2          | 2          | 1          | 1          | 1          | 1          | 1           | 1           | 1           |
| 9%                      | 7             | 5         | 4          | 3          | 2          | 2          | 1          | 1          | 1          | 1          | 1           | 1           | 1           |
| 10%                     | 8             | 7         | 4          | 3          | 2          | 2          | 1          | 1          | 1          | 1          | 1           | 1           | 1           |
| 11%                     | 8             | 7         | 5          | 3          | 2          | 2          | 1          | 1          | 1          | 1          | 1           | 1           | 1           |
| 12%                     | 9             | 8         | 5          | 4          | 3          | 2          | 1          | 1          | 1          | 1          | 1           | 1           | 1           |
| 13%                     | 10            | 8         | 7          | 4          | 3          | 2          | 1          | 1          | 1          | 1          | 1           | 1           | 1           |
| 14%                     | 10            | 9         | 7          | 4          | 3          | 3          | 1          | 1          | 1          | 1          | 1           | 1           | 1           |
| 15%                     | 11            | 10        | 7          | 5          | 3          | 3          | 1          | 1          | 1          | 1          | 1           | 1           | 1           |
| 16%                     | 12            | 10        | 8          | 5          | 3          | 3          | 1          | 1          | 1          | 1          | 1           | 1           | 1           |
| 17%                     | 13            | 11        | 8          | 5          | 3          | 3          | 1          | 1          | 1          | 1          | 1           | 1           | 1           |
| 18%                     | 13            | 11        | 9          | 7          | 4          | 3          | 1          | 1          | 1          | 1          | 1           | 1           | 1           |
| 19%                     | 14            | 12        | 9          | 7          | 4          | 3          | 1          | 1          | 1          | 1          | 1           | 1           | 1           |
| 20%                     | 15            | 13        | 10         | 7          | 4          | 3          | 1          | 1          | 1          | 1          | 1           | 1           | 1           |
| 21%                     | 16            | 13        | 10         | 8          | 4          | 3          | 1          | 1          | 1          | 1          | 1           | 1           | 1           |
| 22%                     | 16            | 14        | 10         | 8          | 4          | 3          | 1          | 1          | 1          | 1          | 1           | 1           | 1           |
| 23%                     | 17            | 14        | 11         | 8          | 5          | 3          | 1          | 1          | 1          | 1          | 1           | 1           | 1           |
| 24%                     | 18            | 15        | 11         | 8          | 5          | 3          | 1          | 1          | 1          | 1          | 1           | 1           | 1           |
| 25%                     | 20            | 16        | 12         | 9          | 5          | 3          | 1          | 1          | 1          | 1          | 1           | 1           | 1           |
| 26%                     | 21            | 16        | 12         | 9          | 5          | 4          | 1          | 1          | 1          | 1          | 1           | 1           | 1           |
| 27%                     | 22            | 17        | 13         | 9          | 5          | 4          | 1          | 1          | 1          | 1          | 1           | 1           | 1           |
| 28%                     | 22            | 18        | 13         | 10         | 7          | 4          | 1          | 1          | 1          | 1          | 1           | 1           | 1           |
| 29%                     | 23            | 18        | 14         | 10         | 7          | 4          | 1          | 1          | 1          | 1          | 1           | 1           | 1           |
| 30%                     | 24            | 20        | 14         | 10         | 7          | 5          | 2          | 2          | 2          | 2          | 2           | 2           | 2           |
| 31%                     | 25            | 21        | 15         | 11         | 7          | 5          | 2          | 2          | 2          | 2          | 2           | 2           | 2           |
| 32%                     | 26            | 22        | 15         | 11         | 7          | 5          | 2          | 2          | 2          | 2          | 2           | 2           | 2           |
| 33%                     | 27            | 22        | 16         | 11         | 8          | 5          | 2          | 2          | 2          | 2          | 2           | 2           | 2           |
| 34%                     | 28            | 23        | 16         | 12         | 8          | 5          | 2          | 2          | 2          | 2          | 2           | 2           | 2           |
| 35%                     | 29            | 24        | 17         | 12         | 8          | 5          | 2          | 2          | 2          | 2          | 2           | 2           | 2           |
| 36%                     | 30            | 25        | 17         | 12         | 8          | 5          | 2          | 2          | 2          | 2          | 2           | 2           | 2           |
| 37%                     | 32            | 25        | 18         | 13         | 8          | 5          | 2          | 2          | 2          | 2          | 2           | 2           | 2           |
| 38%                     | 33            | 26        | 18         | 13         | 9          | 6          | 2          | 2          | 2          | 2          | 2           | 2           | 2           |
| 39%                     | 34            | 27        | 20         | 13         | 9          | 6          | 2          | 2          | 2          | 2          | 2           | 2           | 2           |
| 40%                     | 35            | 28        | 20         | 14         | 9          | 6          | 2          | 2          | 2          | 2          | 2           | 2           | 2           |
| 41%                     | 36            | 29        | 21         | 14         | 9          | 6          | 2          | 2          | 2          | 2          | 2           | 2           | 2           |
| 42%                     | 37            | 29        | 21         | 14         | 9          | 6          | 2          | 2          | 2          | 2          | 2           | 2           | 2           |
| 43%                     | 38            | 30        | 22         | 15         | 10         | 6          | 2          | 2          | 2          | 2          | 2           | 2           | 2           |
| 44%                     | 39            | 32        | 23         | 15         | 10         | 6          | 2          | 2          | 2          | 2          | 2           | 2           | 2           |
| 45%                     | 40            | 33        | 23         | 16         | 10         | 6          | 2          | 2          | 2          | 2          | 2           | 2           | 2           |
| 46%                     | 42            | 34        | 24         | 16         | 10         | 6          | 2          | 2          | 2          | 2          | 2           | 2           | 2           |
| 47%                     | 43            | 35        | 24         | 16         | 10         | 6          | 2          | 2          | 2          | 2          | 2           | 2           | 2           |

|      |     |     |    |    |    |    |   |   |   |   |   |   |   |
|------|-----|-----|----|----|----|----|---|---|---|---|---|---|---|
| 48%  | 45  | 36  | 25 | 17 | 11 | 6  | 2 | 2 | 2 | 2 | 2 | 2 | 2 |
| 49%  | 46  | 36  | 25 | 17 | 11 | 7  | 2 | 2 | 2 | 2 | 2 | 2 | 2 |
| 50%  | 47  | 37  | 26 | 17 | 11 | 8  | 3 | 3 | 3 | 3 | 3 | 3 | 3 |
| 51%  | 49  | 38  | 27 | 18 | 11 | 8  | 3 | 3 | 3 | 3 | 3 | 3 | 3 |
| 52%  | 50  | 39  | 27 | 18 | 12 | 8  | 3 | 3 | 3 | 3 | 3 | 3 | 3 |
| 53%  | 51  | 40  | 28 | 20 | 12 | 8  | 3 | 3 | 3 | 3 | 3 | 3 | 3 |
| 54%  | 53  | 41  | 28 | 20 | 12 | 8  | 3 | 3 | 3 | 3 | 3 | 3 | 3 |
| 55%  | 54  | 42  | 29 | 20 | 12 | 8  | 3 | 3 | 3 | 3 | 3 | 3 | 3 |
| 56%  | 55  | 43  | 30 | 21 | 12 | 8  | 3 | 3 | 3 | 3 | 3 | 3 | 3 |
| 57%  | 58  | 45  | 30 | 21 | 13 | 8  | 3 | 3 | 3 | 3 | 3 | 3 | 3 |
| 58%  | 59  | 46  | 32 | 21 | 13 | 8  | 3 | 3 | 3 | 3 | 3 | 3 | 3 |
| 59%  | 61  | 47  | 33 | 22 | 13 | 8  | 3 | 3 | 3 | 3 | 3 | 3 | 3 |
| 60%  | 62  | 48  | 33 | 22 | 13 | 9  | 3 | 3 | 3 | 3 | 3 | 3 | 3 |
| 61%  | 64  | 49  | 34 | 23 | 14 | 9  | 3 | 3 | 3 | 3 | 3 | 3 | 3 |
| 62%  | 65  | 51  | 35 | 23 | 14 | 9  | 3 | 3 | 3 | 3 | 3 | 3 | 3 |
| 63%  | 67  | 52  | 35 | 23 | 14 | 9  | 3 | 3 | 3 | 3 | 3 | 3 | 3 |
| 64%  | 70  | 53  | 36 | 24 | 14 | 9  | 3 | 3 | 3 | 3 | 3 | 3 | 3 |
| 65%  | 71  | 54  | 37 | 24 | 14 | 9  | 3 | 3 | 3 | 3 | 3 | 3 | 3 |
| 66%  | 73  | 55  | 37 | 25 | 15 | 9  | 3 | 3 | 3 | 3 | 3 | 3 | 3 |
| 67%  | 75  | 57  | 38 | 25 | 15 | 9  | 3 | 3 | 3 | 3 | 3 | 3 | 3 |
| 68%  | 77  | 59  | 39 | 26 | 15 | 10 | 4 | 4 | 4 | 4 | 4 | 4 | 4 |
| 69%  | 78  | 60  | 40 | 26 | 15 | 10 | 4 | 4 | 4 | 4 | 4 | 4 | 4 |
| 70%  | 80  | 61  | 40 | 26 | 16 | 10 | 4 | 4 | 4 | 4 | 4 | 4 | 4 |
| 71%  | 83  | 62  | 41 | 27 | 16 | 11 | 4 | 4 | 4 | 4 | 4 | 4 | 4 |
| 72%  | 85  | 64  | 42 | 27 | 16 | 11 | 4 | 4 | 4 | 4 | 4 | 4 | 4 |
| 73%  | 87  | 65  | 43 | 28 | 16 | 11 | 4 | 4 | 4 | 4 | 4 | 4 | 4 |
| 74%  | 89  | 66  | 43 | 28 | 17 | 11 | 4 | 4 | 4 | 4 | 4 | 4 | 4 |
| 75%  | 91  | 68  | 45 | 29 | 17 | 11 | 4 | 4 | 4 | 4 | 4 | 4 | 4 |
| 76%  | 95  | 70  | 46 | 29 | 17 | 11 | 4 | 4 | 4 | 4 | 4 | 4 | 4 |
| 77%  | 97  | 72  | 47 | 30 | 17 | 11 | 4 | 4 | 4 | 4 | 4 | 4 | 4 |
| 78%  | 99  | 73  | 47 | 30 | 17 | 11 | 4 | 4 | 4 | 4 | 4 | 4 | 4 |
| 79%  | 101 | 75  | 48 | 30 | 18 | 11 | 4 | 4 | 4 | 4 | 4 | 4 | 4 |
| 80%  | 104 | 76  | 49 | 32 | 18 | 11 | 4 | 4 | 4 | 4 | 4 | 4 | 4 |
| 81%  | 107 | 78  | 50 | 32 | 18 | 11 | 4 | 4 | 4 | 4 | 4 | 4 | 4 |
| 82%  | 110 | 79  | 51 | 33 | 18 | 12 | 4 | 4 | 4 | 4 | 4 | 4 | 4 |
| 83%  | 112 | 82  | 52 | 33 | 20 | 13 | 5 | 5 | 5 | 5 | 5 | 5 | 5 |
| 84%  | 115 | 83  | 52 | 34 | 20 | 13 | 5 | 5 | 5 | 5 | 5 | 5 | 5 |
| 85%  | 118 | 85  | 53 | 34 | 20 | 13 | 5 | 5 | 5 | 5 | 5 | 5 | 5 |
| 86%  | 122 | 87  | 54 | 35 | 20 | 13 | 5 | 5 | 5 | 5 | 5 | 5 | 5 |
| 87%  | 124 | 89  | 55 | 35 | 21 | 13 | 5 | 5 | 5 | 5 | 5 | 5 | 5 |
| 88%  | 127 | 90  | 57 | 36 | 21 | 13 | 5 | 5 | 5 | 5 | 5 | 5 | 5 |
| 89%  | 130 | 92  | 58 | 36 | 21 | 13 | 5 | 5 | 5 | 5 | 5 | 5 | 5 |
| 90%  | 135 | 95  | 59 | 37 | 21 | 13 | 5 | 5 | 5 | 5 | 5 | 5 | 5 |
| 91%  | 138 | 97  | 60 | 37 | 22 | 13 | 5 | 5 | 5 | 5 | 5 | 5 | 5 |
| 92%  | 141 | 99  | 61 | 38 | 22 | 13 | 5 | 5 | 5 | 5 | 5 | 5 | 5 |
| 93%  | 146 | 101 | 62 | 38 | 22 | 14 | 5 | 5 | 5 | 5 | 5 | 5 | 5 |
| 94%  | 149 | 103 | 63 | 39 | 22 | 14 | 5 | 5 | 5 | 5 | 5 | 5 | 5 |
| 95%  | 153 | 105 | 64 | 39 | 23 | 14 | 5 | 5 | 5 | 5 | 5 | 5 | 5 |
| 96%  | 158 | 108 | 65 | 40 | 23 | 15 | 6 | 6 | 6 | 6 | 6 | 6 | 6 |
| 97%  | 162 | 110 | 66 | 40 | 23 | 15 | 6 | 6 | 6 | 6 | 6 | 6 | 6 |
| 98%  | 166 | 112 | 67 | 41 | 24 | 15 | 6 | 6 | 6 | 6 | 6 | 6 | 6 |
| 99%  | 171 | 114 | 68 | 42 | 24 | 15 | 6 | 6 | 6 | 6 | 6 | 6 | 6 |
| 100% | 175 | 117 | 70 | 42 | 24 | 15 | 6 | 6 | 6 | 6 | 6 | 6 | 6 |

**Supplementary Table S18.** Differences between AMs' consumption levels calculated by means of novel pediatric-adjusted methodology vs conventional ATC/DDD methodology for antifungals (base case), %

| Share /<br>Age<br>group | 1-11<br>month | 1<br>year | 2<br>years | 3<br>years | 4<br>years | 5<br>years | 6<br>years | 7<br>years | 8<br>years | 9<br>years | 10<br>years | 11<br>years | 12<br>years |
|-------------------------|---------------|-----------|------------|------------|------------|------------|------------|------------|------------|------------|-------------|-------------|-------------|
| 1%                      | 1             | 1         | 0          | 0          | 0          | 0          | 0          | 0          | 0          | 0          | 0           | 0           | 0           |
| 2%                      | 1             | 1         | 0          | 0          | 0          | 0          | 0          | 0          | 0          | 0          | 0           | 0           | 0           |
| 3%                      | 2             | 1         | 1          | 0          | 0          | 0          | 0          | 0          | 0          | 0          | 0           | 0           | 0           |
| 4%                      | 3             | 2         | 2          | 1          | 0          | 0          | 0          | 0          | 0          | 0          | 0           | 0           | 0           |
| 5%                      | 3             | 2         | 2          | 1          | 0          | 0          | 0          | 0          | 0          | 0          | 0           | 0           | 0           |
| 6%                      | 3             | 3         | 2          | 1          | 0          | 0          | 0          | 0          | 0          | 0          | 0           | 0           | 0           |
| 7%                      | 4             | 4         | 2          | 1          | 0          | 0          | 0          | 0          | 0          | 0          | 0           | 0           | 0           |
| 8%                      | 5             | 4         | 3          | 1          | 0          | 0          | 0          | 0          | 0          | 0          | 0           | 0           | 0           |
| 9%                      | 5             | 4         | 3          | 2          | 0          | 0          | 0          | 0          | 0          | 0          | 0           | 0           | 0           |
| 10%                     | 6             | 5         | 3          | 2          | 0          | 0          | 0          | 0          | 0          | 0          | 0           | 0           | 0           |
| 11%                     | 7             | 6         | 4          | 2          | 1          | 0          | 0          | 0          | 0          | 0          | 0           | 0           | 0           |
| 12%                     | 7             | 6         | 4          | 2          | 1          | 0          | 0          | 0          | 0          | 0          | 0           | 0           | 0           |
| 13%                     | 8             | 6         | 5          | 2          | 1          | 0          | 0          | 0          | 0          | 0          | 0           | 0           | 0           |
| 14%                     | 9             | 7         | 5          | 3          | 1          | 0          | 0          | 0          | 0          | 0          | 0           | 0           | 0           |
| 15%                     | 9             | 7         | 5          | 3          | 1          | 0          | 0          | 0          | 0          | 0          | 0           | 0           | 0           |
| 16%                     | 10            | 8         | 5          | 3          | 1          | 0          | 0          | 0          | 0          | 0          | 0           | 0           | 0           |
| 17%                     | 11            | 9         | 6          | 3          | 1          | 0          | 0          | 0          | 0          | 0          | 0           | 0           | 0           |
| 18%                     | 11            | 9         | 6          | 3          | 1          | 0          | 0          | 0          | 0          | 0          | 0           | 0           | 0           |
| 19%                     | 12            | 10        | 7          | 3          | 1          | 0          | 0          | 0          | 0          | 0          | 0           | 0           | 0           |
| 20%                     | 13            | 10        | 7          | 4          | 1          | 0          | 0          | 0          | 0          | 0          | 0           | 0           | 0           |
| 21%                     | 14            | 11        | 7          | 4          | 1          | 0          | 0          | 0          | 0          | 0          | 0           | 0           | 0           |
| 22%                     | 14            | 11        | 8          | 4          | 1          | 0          | 0          | 0          | 0          | 0          | 0           | 0           | 0           |
| 23%                     | 15            | 12        | 8          | 4          | 1          | 0          | 0          | 0          | 0          | 0          | 0           | 0           | 0           |
| 24%                     | 16            | 12        | 9          | 4          | 1          | 0          | 0          | 0          | 0          | 0          | 0           | 0           | 0           |
| 25%                     | 16            | 13        | 9          | 5          | 2          | 1          | 0          | 0          | 0          | 0          | 0           | 0           | 0           |
| 26%                     | 17            | 14        | 9          | 5          | 2          | 1          | 0          | 0          | 0          | 0          | 0           | 0           | 0           |
| 27%                     | 18            | 14        | 10         | 5          | 2          | 1          | 0          | 0          | 0          | 0          | 0           | 0           | 0           |
| 28%                     | 19            | 15        | 10         | 5          | 2          | 1          | 0          | 0          | 0          | 0          | 0           | 0           | 0           |
| 29%                     | 20            | 15        | 11         | 5          | 2          | 1          | 0          | 0          | 0          | 0          | 0           | 0           | 0           |
| 30%                     | 21            | 16        | 11         | 6          | 2          | 1          | 0          | 0          | 0          | 0          | 0           | 0           | 0           |
| 31%                     | 21            | 16        | 12         | 6          | 2          | 1          | 0          | 0          | 0          | 0          | 0           | 0           | 0           |
| 32%                     | 23            | 17        | 12         | 6          | 2          | 1          | 0          | 0          | 0          | 0          | 0           | 0           | 0           |
| 33%                     | 23            | 18        | 12         | 6          | 2          | 1          | 0          | 0          | 0          | 0          | 0           | 0           | 0           |
| 34%                     | 24            | 19        | 13         | 7          | 2          | 1          | 0          | 0          | 0          | 0          | 0           | 0           | 0           |
| 35%                     | 25            | 19        | 13         | 7          | 2          | 1          | 0          | 0          | 0          | 0          | 0           | 0           | 0           |
| 36%                     | 26            | 20        | 14         | 7          | 2          | 1          | 0          | 0          | 0          | 0          | 0           | 0           | 0           |
| 37%                     | 27            | 21        | 14         | 7          | 2          | 1          | 0          | 0          | 0          | 0          | 0           | 0           | 0           |
| 38%                     | 28            | 21        | 15         | 7          | 2          | 1          | 0          | 0          | 0          | 0          | 0           | 0           | 0           |
| 39%                     | 29            | 22        | 15         | 8          | 2          | 1          | 0          | 0          | 0          | 0          | 0           | 0           | 0           |
| 40%                     | 30            | 23        | 16         | 8          | 2          | 1          | 0          | 0          | 0          | 0          | 0           | 0           | -1          |
| 41%                     | 31            | 23        | 16         | 8          | 3          | 1          | 0          | 0          | 0          | 0          | 0           | 0           | -1          |
| 42%                     | 32            | 24        | 16         | 8          | 3          | 1          | 0          | 0          | 0          | 0          | 0           | 0           | -1          |
| 43%                     | 32            | 25        | 17         | 8          | 3          | 1          | 0          | 0          | 0          | 0          | 0           | 0           | -1          |
| 44%                     | 33            | 25        | 17         | 9          | 3          | 1          | 0          | 0          | 0          | 0          | 0           | 0           | -1          |
| 45%                     | 35            | 26        | 18         | 9          | 3          | 1          | 0          | 0          | 0          | 0          | 0           | 0           | -1          |
| 46%                     | 36            | 27        | 18         | 9          | 3          | 1          | 0          | 0          | 0          | 0          | 0           | 0           | -1          |
| 47%                     | 37            | 28        | 19         | 9          | 3          | 1          | 0          | 0          | 0          | -1         | -1          | -1          | -1          |

|      |     |    |    |    |   |   |   |   |    |    |    |    |    |
|------|-----|----|----|----|---|---|---|---|----|----|----|----|----|
| 48%  | 38  | 28 | 19 | 9  | 3 | 1 | 0 | 0 | 0  | -1 | -1 | -1 | -1 |
| 49%  | 39  | 29 | 20 | 10 | 3 | 1 | 0 | 0 | 0  | -1 | -1 | -1 | -1 |
| 50%  | 40  | 30 | 20 | 10 | 3 | 1 | 0 | 0 | 0  | -1 | -1 | -1 | -1 |
| 51%  | 41  | 31 | 21 | 10 | 3 | 1 | 0 | 0 | 0  | -1 | -1 | -1 | -1 |
| 52%  | 42  | 32 | 21 | 11 | 3 | 1 | 0 | 0 | 0  | -1 | -1 | -1 | -1 |
| 53%  | 44  | 32 | 22 | 11 | 3 | 1 | 0 | 0 | 0  | -1 | -1 | -1 | -1 |
| 54%  | 45  | 33 | 22 | 11 | 3 | 1 | 0 | 0 | 0  | -1 | -1 | -1 | -1 |
| 55%  | 46  | 34 | 23 | 11 | 4 | 1 | 0 | 0 | 0  | -1 | -1 | -1 | -1 |
| 56%  | 47  | 35 | 23 | 11 | 4 | 1 | 0 | 0 | 0  | -1 | -1 | -1 | -1 |
| 57%  | 48  | 36 | 24 | 12 | 4 | 1 | 1 | 0 | 0  | -1 | -1 | -1 | -1 |
| 58%  | 50  | 37 | 25 | 12 | 4 | 1 | 1 | 0 | 0  | -1 | -1 | -1 | -1 |
| 59%  | 51  | 37 | 25 | 12 | 4 | 1 | 1 | 0 | 0  | -1 | -1 | -1 | -1 |
| 60%  | 52  | 38 | 26 | 12 | 4 | 1 | 1 | 0 | 0  | -1 | -1 | -1 | -1 |
| 61%  | 54  | 39 | 26 | 13 | 4 | 1 | 1 | 0 | 0  | -1 | -1 | -1 | -1 |
| 62%  | 55  | 41 | 27 | 13 | 4 | 1 | 1 | 0 | 0  | -1 | -1 | -1 | -1 |
| 63%  | 56  | 41 | 27 | 13 | 4 | 1 | 1 | 0 | 0  | -1 | -1 | -1 | -1 |
| 64%  | 58  | 42 | 28 | 13 | 4 | 1 | 1 | 0 | 0  | -1 | -1 | -1 | -1 |
| 65%  | 59  | 43 | 28 | 14 | 4 | 1 | 1 | 0 | 0  | -1 | -1 | -1 | -1 |
| 66%  | 61  | 44 | 29 | 14 | 4 | 1 | 1 | 0 | 0  | -1 | -1 | -1 | -1 |
| 67%  | 63  | 45 | 30 | 14 | 4 | 2 | 1 | 0 | 0  | -1 | -1 | -1 | -1 |
| 68%  | 64  | 46 | 30 | 14 | 4 | 2 | 1 | 0 | 0  | -1 | -1 | -1 | -1 |
| 69%  | 65  | 47 | 31 | 14 | 5 | 2 | 1 | 0 | 0  | -1 | -1 | -1 | -1 |
| 70%  | 67  | 48 | 31 | 15 | 5 | 2 | 1 | 0 | 0  | -1 | -1 | -1 | -1 |
| 71%  | 69  | 49 | 32 | 15 | 5 | 2 | 1 | 0 | 0  | -1 | -1 | -1 | -1 |
| 72%  | 70  | 50 | 33 | 15 | 5 | 2 | 1 | 0 | 0  | -1 | -1 | -1 | -1 |
| 73%  | 72  | 51 | 33 | 15 | 5 | 2 | 1 | 0 | -1 | -1 | -1 | -1 | -1 |
| 74%  | 74  | 52 | 34 | 16 | 5 | 2 | 1 | 0 | -1 | -1 | -1 | -1 | -1 |
| 75%  | 75  | 53 | 34 | 16 | 5 | 2 | 1 | 0 | -1 | -1 | -1 | -1 | -1 |
| 76%  | 77  | 54 | 35 | 16 | 5 | 2 | 1 | 0 | -1 | -1 | -1 | -1 | -1 |
| 77%  | 79  | 56 | 36 | 16 | 5 | 2 | 1 | 0 | -1 | -1 | -1 | -1 | -1 |
| 78%  | 81  | 57 | 36 | 17 | 5 | 2 | 1 | 0 | -1 | -1 | -1 | -1 | -1 |
| 79%  | 83  | 58 | 37 | 17 | 5 | 2 | 1 | 0 | -1 | -1 | -1 | -1 | -1 |
| 80%  | 85  | 59 | 38 | 17 | 5 | 2 | 1 | 0 | -1 | -1 | -1 | -1 | -1 |
| 81%  | 87  | 61 | 38 | 18 | 6 | 2 | 1 | 0 | -1 | -1 | -1 | -1 | -1 |
| 82%  | 89  | 62 | 39 | 18 | 6 | 2 | 1 | 0 | -1 | -1 | -1 | -1 | -1 |
| 83%  | 91  | 63 | 40 | 18 | 6 | 2 | 1 | 0 | -1 | -1 | -1 | -1 | -1 |
| 84%  | 93  | 64 | 41 | 18 | 6 | 2 | 1 | 0 | -1 | -1 | -1 | -1 | -1 |
| 85%  | 95  | 65 | 41 | 19 | 6 | 2 | 1 | 0 | -1 | -1 | -1 | -1 | -1 |
| 86%  | 97  | 67 | 42 | 19 | 6 | 2 | 1 | 0 | -1 | -1 | -1 | -1 | -1 |
| 87%  | 100 | 68 | 43 | 19 | 6 | 2 | 1 | 0 | -1 | -1 | -1 | -1 | -1 |
| 88%  | 102 | 69 | 43 | 19 | 6 | 2 | 1 | 0 | -1 | -1 | -1 | -1 | -1 |
| 89%  | 105 | 71 | 44 | 20 | 6 | 2 | 1 | 0 | -1 | -1 | -1 | -1 | -1 |
| 90%  | 107 | 72 | 45 | 20 | 6 | 2 | 1 | 0 | -1 | -1 | -1 | -1 | -1 |
| 91%  | 110 | 74 | 46 | 20 | 6 | 2 | 1 | 0 | -1 | -1 | -1 | -1 | -1 |
| 92%  | 113 | 75 | 47 | 21 | 6 | 2 | 1 | 0 | -1 | -1 | -1 | -1 | -1 |
| 93%  | 115 | 77 | 48 | 21 | 6 | 2 | 1 | 0 | -1 | -1 | -1 | -1 | -1 |
| 94%  | 118 | 78 | 48 | 21 | 7 | 2 | 1 | 0 | -1 | -1 | -1 | -1 | -1 |
| 95%  | 121 | 79 | 49 | 22 | 7 | 3 | 1 | 0 | -1 | -1 | -1 | -1 | -1 |
| 96%  | 124 | 82 | 50 | 22 | 7 | 3 | 1 | 0 | -1 | -1 | -1 | -1 | -1 |
| 97%  | 127 | 83 | 51 | 22 | 7 | 3 | 1 | 0 | -1 | -1 | -1 | -1 | -1 |
| 98%  | 130 | 85 | 52 | 22 | 7 | 3 | 1 | 0 | -1 | -1 | -1 | -1 | -1 |
| 99%  | 133 | 86 | 53 | 23 | 7 | 3 | 1 | 0 | -1 | -1 | -1 | -1 | -1 |
| 100% | 137 | 88 | 53 | 23 | 7 | 3 | 1 | 0 | -1 | -1 | -1 | -1 | -1 |

**Supplementary Table S19.** Differences between AMs' consumption levels calculated by means of novel pediatric-adjusted methodology vs conventional ATC/DDD methodology for antivirals (base case), %

| Share /<br>Age<br>group | 1-11<br>month | 1<br>year | 2<br>years | 3<br>years | 4<br>years | 5<br>years | 6<br>years | 7<br>years | 8<br>years | 9<br>years | 10<br>years | 11<br>years | 12<br>years |
|-------------------------|---------------|-----------|------------|------------|------------|------------|------------|------------|------------|------------|-------------|-------------|-------------|
| 1%                      | 0             | 1         | 1          | 1          | 1          | 1          | 0          | 0          | 0          | 0          | 0           | 0           | 0           |
| 2%                      | 0             | 1         | 1          | 1          | 1          | 1          | 1          | 1          | 1          | 1          | 1           | 1           | 0           |
| 3%                      | 3             | 2         | 2          | 2          | 2          | 2          | 1          | 1          | 1          | 1          | 1           | 1           | 0           |
| 4%                      | 3             | 3         | 3          | 3          | 3          | 3          | 2          | 2          | 2          | 2          | 1           | 1           | 0           |
| 5%                      | 3             | 3         | 3          | 4          | 3          | 3          | 3          | 3          | 2          | 2          | 2           | 2           | 1           |
| 6%                      | 3             | 4         | 4          | 4          | 4          | 4          | 3          | 3          | 3          | 3          | 2           | 2           | 1           |
| 7%                      | 6             | 5         | 5          | 5          | 5          | 5          | 4          | 4          | 3          | 3          | 3           | 3           | 1           |
| 8%                      | 6             | 5         | 6          | 6          | 5          | 5          | 4          | 4          | 3          | 3          | 3           | 3           | 1           |
| 9%                      | 6             | 7         | 7          | 7          | 6          | 6          | 5          | 5          | 4          | 4          | 3           | 3           | 1           |
| 10%                     | 10            | 8         | 8          | 7          | 7          | 7          | 5          | 5          | 5          | 4          | 4           | 4           | 1           |
| 11%                     | 10            | 8         | 9          | 8          | 8          | 8          | 6          | 6          | 5          | 5          | 4           | 4           | 1           |
| 12%                     | 10            | 9         | 9          | 9          | 8          | 8          | 7          | 6          | 5          | 5          | 5           | 4           | 1           |
| 13%                     | 13            | 10        | 10         | 10         | 9          | 9          | 7          | 7          | 6          | 6          | 5           | 5           | 2           |
| 14%                     | 13            | 11        | 11         | 11         | 10         | 10         | 8          | 7          | 7          | 6          | 6           | 5           | 2           |
| 15%                     | 13            | 11        | 12         | 12         | 11         | 11         | 8          | 8          | 7          | 7          | 6           | 6           | 2           |
| 16%                     | 16            | 12        | 13         | 13         | 12         | 11         | 9          | 8          | 7          | 7          | 7           | 6           | 2           |
| 17%                     | 16            | 13        | 14         | 13         | 12         | 12         | 10         | 9          | 8          | 8          | 7           | 7           | 2           |
| 18%                     | 19            | 14        | 15         | 15         | 13         | 13         | 10         | 10         | 8          | 8          | 7           | 7           | 2           |
| 19%                     | 19            | 15        | 16         | 15         | 14         | 14         | 11         | 10         | 9          | 9          | 8           | 8           | 3           |
| 20%                     | 19            | 16        | 17         | 16         | 15         | 15         | 12         | 11         | 9          | 9          | 8           | 8           | 3           |
| 21%                     | 23            | 17        | 18         | 17         | 16         | 16         | 12         | 12         | 10         | 10         | 9           | 8           | 3           |
| 22%                     | 23            | 18        | 18         | 18         | 17         | 17         | 13         | 12         | 11         | 10         | 9           | 9           | 3           |
| 23%                     | 26            | 19        | 20         | 19         | 18         | 17         | 13         | 12         | 11         | 11         | 10          | 9           | 3           |
| 24%                     | 26            | 20        | 21         | 20         | 19         | 18         | 14         | 13         | 11         | 11         | 10          | 10          | 3           |
| 25%                     | 29            | 21        | 22         | 21         | 20         | 19         | 15         | 14         | 12         | 12         | 10          | 10          | 3           |
| 26%                     | 29            | 22        | 23         | 23         | 20         | 20         | 16         | 14         | 13         | 12         | 11          | 11          | 3           |
| 27%                     | 29            | 23        | 24         | 24         | 22         | 21         | 16         | 15         | 13         | 13         | 12          | 11          | 4           |
| 28%                     | 32            | 24        | 25         | 24         | 22         | 22         | 17         | 16         | 14         | 14         | 12          | 12          | 4           |
| 29%                     | 32            | 25        | 26         | 26         | 23         | 23         | 18         | 16         | 14         | 14         | 12          | 12          | 4           |
| 30%                     | 35            | 26        | 28         | 27         | 25         | 24         | 19         | 17         | 15         | 15         | 13          | 13          | 4           |
| 31%                     | 35            | 28        | 29         | 28         | 26         | 25         | 20         | 18         | 16         | 15         | 14          | 13          | 4           |
| 32%                     | 39            | 29        | 30         | 29         | 27         | 26         | 20         | 18         | 16         | 16         | 14          | 13          | 4           |
| 33%                     | 39            | 30        | 31         | 30         | 28         | 27         | 21         | 19         | 17         | 16         | 14          | 14          | 4           |
| 34%                     | 42            | 31        | 33         | 32         | 29         | 28         | 22         | 20         | 18         | 17         | 15          | 14          | 5           |
| 35%                     | 45            | 32        | 34         | 33         | 30         | 29         | 23         | 21         | 18         | 18         | 16          | 15          | 5           |
| 36%                     | 45            | 34        | 35         | 34         | 31         | 31         | 23         | 21         | 19         | 18         | 16          | 16          | 5           |
| 37%                     | 48            | 35        | 36         | 35         | 32         | 32         | 24         | 22         | 19         | 19         | 16          | 16          | 5           |
| 38%                     | 48            | 36        | 38         | 37         | 33         | 33         | 25         | 23         | 20         | 19         | 17          | 16          | 5           |
| 39%                     | 52            | 37        | 39         | 38         | 35         | 34         | 26         | 24         | 21         | 20         | 18          | 17          | 5           |
| 40%                     | 55            | 39        | 41         | 39         | 36         | 35         | 27         | 24         | 21         | 21         | 18          | 17          | 5           |
| 41%                     | 55            | 40        | 42         | 41         | 37         | 37         | 28         | 25         | 22         | 21         | 19          | 18          | 6           |
| 42%                     | 58            | 41        | 43         | 42         | 38         | 38         | 28         | 26         | 23         | 22         | 19          | 19          | 6           |
| 43%                     | 61            | 43        | 45         | 44         | 40         | 39         | 29         | 27         | 24         | 23         | 20          | 19          | 6           |
| 44%                     | 61            | 44        | 47         | 45         | 41         | 40         | 30         | 27         | 24         | 23         | 21          | 20          | 6           |
| 45%                     | 65            | 46        | 48         | 47         | 43         | 42         | 31         | 28         | 25         | 24         | 21          | 20          | 6           |
| 46%                     | 68            | 47        | 50         | 48         | 44         | 43         | 32         | 29         | 25         | 25         | 22          | 21          | 6           |
| 47%                     | 71            | 49        | 52         | 50         | 45         | 45         | 33         | 30         | 26         | 26         | 22          | 21          | 7           |

|      |     |     |     |     |     |     |     |    |    |    |    |    |    |
|------|-----|-----|-----|-----|-----|-----|-----|----|----|----|----|----|----|
| 48%  | 74  | 51  | 53  | 51  | 47  | 46  | 34  | 31 | 27 | 26 | 23 | 22 | 7  |
| 49%  | 74  | 52  | 55  | 53  | 48  | 47  | 35  | 32 | 28 | 27 | 24 | 23 | 7  |
| 50%  | 77  | 54  | 57  | 55  | 50  | 49  | 36  | 33 | 29 | 28 | 24 | 23 | 7  |
| 51%  | 81  | 56  | 59  | 57  | 51  | 50  | 37  | 33 | 29 | 28 | 25 | 24 | 7  |
| 52%  | 84  | 58  | 60  | 58  | 53  | 52  | 38  | 34 | 30 | 29 | 26 | 25 | 8  |
| 53%  | 87  | 60  | 62  | 60  | 55  | 54  | 39  | 35 | 31 | 30 | 26 | 25 | 8  |
| 54%  | 90  | 61  | 64  | 62  | 56  | 55  | 40  | 36 | 32 | 31 | 27 | 26 | 8  |
| 55%  | 94  | 63  | 66  | 64  | 58  | 57  | 41  | 37 | 32 | 31 | 27 | 26 | 8  |
| 56%  | 97  | 65  | 68  | 66  | 59  | 58  | 42  | 38 | 33 | 32 | 28 | 27 | 8  |
| 57%  | 100 | 67  | 71  | 68  | 61  | 60  | 43  | 39 | 34 | 33 | 29 | 28 | 8  |
| 58%  | 106 | 69  | 73  | 70  | 63  | 62  | 45  | 40 | 35 | 34 | 29 | 28 | 8  |
| 59%  | 110 | 71  | 75  | 72  | 65  | 64  | 46  | 41 | 36 | 35 | 30 | 29 | 9  |
| 60%  | 113 | 74  | 77  | 74  | 67  | 66  | 47  | 42 | 36 | 35 | 31 | 29 | 9  |
| 61%  | 116 | 76  | 80  | 76  | 69  | 67  | 48  | 43 | 37 | 36 | 31 | 30 | 9  |
| 62%  | 123 | 78  | 82  | 78  | 71  | 70  | 49  | 44 | 38 | 37 | 32 | 31 | 9  |
| 63%  | 126 | 80  | 84  | 81  | 73  | 71  | 50  | 45 | 39 | 38 | 33 | 32 | 9  |
| 64%  | 129 | 82  | 87  | 83  | 75  | 73  | 51  | 46 | 40 | 39 | 34 | 32 | 9  |
| 65%  | 135 | 85  | 90  | 86  | 77  | 76  | 53  | 47 | 41 | 40 | 35 | 33 | 10 |
| 66%  | 139 | 87  | 92  | 88  | 80  | 78  | 54  | 48 | 42 | 41 | 35 | 34 | 10 |
| 67%  | 145 | 91  | 95  | 91  | 82  | 80  | 56  | 49 | 43 | 41 | 36 | 34 | 10 |
| 68%  | 152 | 93  | 98  | 93  | 84  | 83  | 57  | 50 | 44 | 42 | 37 | 35 | 10 |
| 69%  | 158 | 96  | 101 | 96  | 86  | 85  | 58  | 51 | 45 | 43 | 37 | 36 | 10 |
| 70%  | 165 | 99  | 104 | 99  | 89  | 87  | 60  | 53 | 46 | 44 | 38 | 37 | 11 |
| 71%  | 171 | 102 | 107 | 102 | 92  | 90  | 61  | 54 | 47 | 45 | 39 | 37 | 11 |
| 72%  | 177 | 105 | 110 | 105 | 94  | 92  | 62  | 55 | 48 | 46 | 40 | 38 | 11 |
| 73%  | 184 | 108 | 114 | 108 | 97  | 95  | 64  | 56 | 49 | 47 | 41 | 39 | 11 |
| 74%  | 190 | 112 | 117 | 111 | 100 | 97  | 66  | 57 | 50 | 48 | 41 | 40 | 11 |
| 75%  | 197 | 115 | 121 | 114 | 103 | 100 | 67  | 59 | 51 | 49 | 42 | 41 | 11 |
| 76%  | 206 | 118 | 124 | 118 | 106 | 103 | 69  | 60 | 52 | 50 | 43 | 41 | 12 |
| 77%  | 216 | 122 | 128 | 121 | 109 | 106 | 70  | 61 | 53 | 51 | 44 | 42 | 12 |
| 78%  | 226 | 126 | 132 | 125 | 112 | 109 | 72  | 63 | 54 | 52 | 45 | 43 | 12 |
| 79%  | 235 | 130 | 136 | 128 | 115 | 113 | 74  | 64 | 55 | 53 | 46 | 44 | 12 |
| 80%  | 245 | 134 | 141 | 132 | 119 | 116 | 76  | 65 | 57 | 54 | 47 | 45 | 12 |
| 81%  | 255 | 138 | 145 | 136 | 122 | 119 | 77  | 67 | 58 | 56 | 48 | 46 | 13 |
| 82%  | 268 | 143 | 150 | 141 | 126 | 123 | 79  | 68 | 59 | 57 | 49 | 46 | 13 |
| 83%  | 281 | 147 | 155 | 145 | 130 | 126 | 81  | 70 | 60 | 58 | 50 | 47 | 13 |
| 84%  | 294 | 153 | 160 | 149 | 134 | 130 | 83  | 71 | 61 | 59 | 51 | 48 | 13 |
| 85%  | 306 | 158 | 165 | 154 | 138 | 134 | 85  | 73 | 63 | 60 | 52 | 49 | 13 |
| 86%  | 323 | 163 | 170 | 159 | 142 | 138 | 87  | 74 | 64 | 61 | 53 | 50 | 14 |
| 87%  | 339 | 169 | 176 | 164 | 146 | 142 | 89  | 76 | 66 | 63 | 54 | 51 | 14 |
| 88%  | 358 | 175 | 182 | 169 | 151 | 147 | 91  | 77 | 67 | 64 | 55 | 52 | 14 |
| 89%  | 377 | 181 | 188 | 174 | 156 | 151 | 93  | 79 | 68 | 65 | 56 | 53 | 14 |
| 90%  | 400 | 187 | 195 | 180 | 161 | 156 | 95  | 81 | 70 | 67 | 57 | 54 | 14 |
| 91%  | 423 | 194 | 202 | 186 | 166 | 161 | 98  | 82 | 71 | 68 | 58 | 55 | 14 |
| 92%  | 448 | 202 | 209 | 192 | 171 | 166 | 100 | 84 | 72 | 69 | 59 | 56 | 15 |
| 93%  | 477 | 209 | 216 | 198 | 177 | 172 | 102 | 86 | 74 | 70 | 60 | 57 | 15 |
| 94%  | 510 | 218 | 224 | 205 | 183 | 177 | 105 | 87 | 75 | 72 | 61 | 58 | 15 |
| 95%  | 542 | 226 | 233 | 212 | 189 | 183 | 107 | 89 | 77 | 73 | 62 | 59 | 15 |
| 96%  | 584 | 236 | 241 | 219 | 195 | 189 | 110 | 91 | 78 | 75 | 63 | 60 | 16 |
| 97%  | 626 | 247 | 251 | 227 | 202 | 196 | 112 | 93 | 80 | 76 | 65 | 62 | 16 |
| 98%  | 677 | 257 | 261 | 235 | 209 | 203 | 115 | 95 | 82 | 78 | 66 | 63 | 16 |
| 99%  | 735 | 269 | 272 | 244 | 217 | 210 | 118 | 97 | 83 | 79 | 67 | 64 | 16 |
| 100% | 803 | 282 | 283 | 253 | 225 | 218 | 121 | 99 | 85 | 81 | 68 | 65 | 17 |

**Supplementary Table S20.** Doses and dosing approaches from the national summaries of product characteristics [3] used to calculate cDDD of AMs for children aged 1 month to 12 years

| INN                                      | Adm.R* | ATC code | Daily dose (range)                          |                                                                                                  |                                |            |
|------------------------------------------|--------|----------|---------------------------------------------|--------------------------------------------------------------------------------------------------|--------------------------------|------------|
|                                          |        |          | based on weight, g/kg                       | based on age, g                                                                                  | based on BSA, g/m <sup>2</sup> | other      |
| Azithromycin                             | O      | J01FA10  | 0.01 (0.01-0.02)                            |                                                                                                  |                                |            |
| Azithromycin                             | P      | J01FA10  | NA                                          | NA                                                                                               | NA                             | NA         |
| Aztreonam                                | P      | J01DF01  | 0.12 (0.09-0.12)                            |                                                                                                  |                                |            |
| Amikacin                                 | P      | J01GB06  | 0.02 (0.015-0.02)                           |                                                                                                  |                                |            |
| Amoxicillin                              | O      | J01CA04  | 0.06 (0.03-0.06)                            |                                                                                                  |                                |            |
| Amoxicillin and beta-lactamase inhibitor | O      | J01CR02  | 0.06 (0.03-0.06)                            |                                                                                                  |                                |            |
| Amoxicillin and beta-lactamase inhibitor | P      | J01CR02  | 0.1 (0.075-0.1)                             |                                                                                                  |                                |            |
| Ampicillin                               | P      | J01CA01  | 0.2 (0.1-0.2)                               |                                                                                                  |                                |            |
| Ampicillin and beta-lactamase inhibitor  | P      | J01CR01  | 0.2 (0.1-0.2)                               |                                                                                                  |                                |            |
| Amphotericin B                           | P      | J02AA01  | 0.0015 (0.0003-0.0015)                      |                                                                                                  |                                |            |
| Anidulafungin                            | P      | J02AX06  | 0.0015 (ND)                                 |                                                                                                  |                                |            |
| Acyclovir                                | O      | J05AB01  | 0.08 (ND)                                   |                                                                                                  |                                |            |
| Acyclovir                                | P      | J05AB01  | 0.06 (ND)                                   |                                                                                                  |                                |            |
| Benzathine Benzylpenicillin              | P      | J01CE08  | <30 kg - ½ adult DDD;<br>≥30 kg - adult DDD |                                                                                                  |                                |            |
| Benzylpenicillin                         | P      | J01CE01  | <25 kg – ½ adult DDD;<br>≥25 kg - adult DDD |                                                                                                  |                                |            |
| Bicillin-5                               | P      | J01CE30  |                                             | ≤7 years – 1.1 g/day; ≥8 years – 2.2 g/day                                                       |                                |            |
| Valaciclovir                             | O      | J05AB11  | NA                                          | NA                                                                                               | NA                             | NA         |
| Valganciclovir                           | O      | J05AB14  | NA                                          | NA                                                                                               | NA                             | NA         |
| Vancomycin                               | O      | A07AA09  | 0.04 (ND)                                   |                                                                                                  |                                |            |
| Vancomycin                               | P      | J01XA01  | 0.04 (ND)                                   |                                                                                                  |                                |            |
| Voriconazole                             | O      | J02AC03  | 0.016 (ND)                                  |                                                                                                  |                                |            |
| Voriconazole                             | P      | J02AC03  | 0.018 (ND)                                  |                                                                                                  |                                |            |
| Ganciclovir                              | O      | J05AB06  | NA                                          | NA                                                                                               | NA                             | NA         |
| Ganciclovir                              | P      | J05AB06  | NA                                          | NA                                                                                               | NA                             | NA         |
| Gentamicin                               | P      | J01GB03  | 0.005 (0.003-0.005)                         |                                                                                                  |                                |            |
| Griseofulvin                             | O      | D01BA01  | 0.01 (ND)                                   |                                                                                                  |                                |            |
| Dalbavantsin                             | P      | J01XA04  | NA                                          | NA                                                                                               | NA                             | NA         |
| Daptomycin                               | P      | J01XX09  |                                             | 1-2 year - 0.01 g/day; 2-6 years - 0.009 g/day; 7-11 years - 0.007 g/day; 12 years - 0.005 g/day |                                |            |
| Josamycin                                | O      | J01FA07  | 0.05 (0.04-0.05)                            |                                                                                                  |                                |            |
| Doxycycline                              | O      | J01AA02  | 0.004 (0.002-0.004)                         |                                                                                                  |                                |            |
| Doxycycline                              | P      | J01AA02  | 0.004 (0.002-0.004)                         |                                                                                                  |                                |            |
| Doripenem                                | P      | J01DH04  | NA                                          | NA                                                                                               | NA                             | NA         |
| Zanamivir                                | O      | J05AH01  |                                             |                                                                                                  |                                | 0.02 g/day |
| Isavuconazole                            | O      | J02AC05  | NA                                          | NA                                                                                               | NA                             | NA         |



|                         |   |         |                                                                    |                                                 |                  |               |
|-------------------------|---|---------|--------------------------------------------------------------------|-------------------------------------------------|------------------|---------------|
| Isavuconazole           | P | J02AC05 | NA                                                                 | NA                                              | NA               | NA            |
| Imipenem and cilastatin | P | J01DH51 | 0.06 (ND)                                                          |                                                 |                  |               |
| Itraconazole            | O | J02AC02 | 0.005 (ND)                                                         |                                                 |                  |               |
| Kanamycin               | P | J01GB04 | 0.015 (ND)                                                         |                                                 |                  |               |
| Caspofungin             | P | J02AX04 |                                                                    |                                                 | 0.07 (0.05-0.07) |               |
| Ketoconazole            | O | J02AB02 | <30 kg - 0.1 g/day; ≥30 kg - 0.2 g/day                             |                                                 |                  |               |
| Clarithromycin          | O | J01FA09 | 0.015 (ND)                                                         |                                                 |                  |               |
| Clarithromycin          | P | J01FA09 | NA                                                                 | NA                                              | NA               | NA            |
| Clindamycin             | O | J01FF01 |                                                                    |                                                 |                  | 0.6-1.8 g/day |
| Clindamycin             | P | J01FF01 | 0.04 (0.02-0.04)                                                   |                                                 |                  |               |
| Co-Trimoxazole          | O | J01EE01 | 0.036 (ND)                                                         |                                                 |                  |               |
| Co-Trimoxazole          | P | J01EE01 | 0.036 (ND)                                                         |                                                 |                  |               |
| Levofloxacin            | O | J01MA12 | NA                                                                 | NA                                              | NA               | NA            |
| Levofloxacin            | P | J01MA12 | NA                                                                 | NA                                              | NA               | NA            |
| Linezolid               | O | J01XX08 | 0.03 (ND)                                                          |                                                 |                  |               |
| Linezolid               | P | J01XX08 | 0.03 (ND)                                                          |                                                 |                  |               |
| Lincomycin              | O | J01FF02 | 0.06 (0.03-0.06)                                                   |                                                 |                  |               |
| Lincomycin              | P | J01FF02 | 0.02 (0.01-0.02)                                                   |                                                 |                  |               |
| Lomefloxacin            | O | J01MA07 | NA                                                                 | NA                                              | NA               | NA            |
| Meropenem               | P | J01DH02 | 0.12 (0.03-0.12)                                                   |                                                 |                  |               |
| Metronidazole           | O | P01AB01 |                                                                    |                                                 |                  | 0.5 g/day     |
| Metronidazole           | P | J01XD01 | 0.0225 (ND)                                                        |                                                 |                  |               |
| Midecamycin             | O | J01FA03 | 0.05 (0.02-0.05)                                                   |                                                 |                  |               |
| Micafungin              | P | J02AX05 | 0.004 (0.002-0.004)                                                |                                                 |                  |               |
| minocycline             | O | J01AA08 | 0.004 (0.002-0.004)                                                |                                                 |                  |               |
| Moxifloxacin            | O | J01MA14 | NA                                                                 | NA                                              | NA               | NA            |
| Moxifloxacin            | P | J01MA14 | NA                                                                 | NA                                              | NA               | NA            |
| Natamycin               | O | A07AA03 |                                                                    |                                                 |                  | 0.2 g/day     |
| Netilmicin              | P | J01GB07 | 0.0075 (0.006-0.0075)                                              |                                                 |                  |               |
| Nimorazole              | O | P01AB06 | 0.02 (0.015-0.02)                                                  |                                                 |                  |               |
| Nystatin                | O | A07AA02 |                                                                    |                                                 |                  | 1 g/day       |
| Nitroxoline             | O | J01XX07 |                                                                    | 3-4 years - 0.2 g/day; ≥5 years - 0.2-0.4 g/day |                  |               |
| Nitrofurantoin          | O | J01XE01 | 0.003 (ND)                                                         |                                                 |                  |               |
| Nifuratel               | O | G01AX05 | NA                                                                 | NA                                              | NA               | NA            |
| Nifuroxazide            | O | A07AX03 |                                                                    | <3 years - 0.3 g/day; ≥3 years - 0.6 g/day      |                  |               |
| Norfloxacin             | O | J01MA06 | NA                                                                 | NA                                              | NA               | NA            |
| Oxacillin               | P | J01CF04 |                                                                    | <2 years - 1 g/day; ≥2 years - 2 g/day          |                  |               |
| Ornidazole              | O | P01AB03 | 0.04 (0.025-0.04)                                                  |                                                 |                  |               |
| Ornidazole              | P | J01XD03 | 0.03 (0.02-0.03)                                                   |                                                 |                  |               |
| Oseltamivir             | O | J05AH02 | <15 kg - 0.06 g/day; 15-23 kg - 0.09 g/day; >23-40 kg - 0.12 g/day |                                                 |                  |               |
| Ofloxacin               | O | J01MA01 | NA                                                                 | NA                                              | NA               | NA            |

|                                           |   |         |                                   |                                                                                                 |    |               |
|-------------------------------------------|---|---------|-----------------------------------|-------------------------------------------------------------------------------------------------|----|---------------|
| Ofloxacin                                 | P | J01MA01 | NA                                | NA                                                                                              | NA | NA            |
| Pefloxacin                                | O | J01MA03 | NA                                | NA                                                                                              | NA | NA            |
| Pefloxacin                                | P | J01MA03 | NA                                | NA                                                                                              | NA | NA            |
| Pipemidic acid                            | O | J01MB04 | NA                                | NA                                                                                              | NA | NA            |
| Piperacillin and beta-lactamase inhibitor | P | J01CR05 | 0.3 (ND)                          |                                                                                                 |    |               |
| Posaconazole                              | O | J02AC04 | NA                                | NA                                                                                              | NA | NA            |
| Polymyxin B                               | P | J01XB02 | 0.0025 (0.0015-0.0025)            |                                                                                                 |    |               |
| Rimantadine                               | O | J05AC02 |                                   | <3 years - 0.04 g/day; 3-7 years - 0.06 g/day; 7-10 years - 0.1 g/day; 10-12 years - 0.15 g/day |    |               |
| Rifaximin                                 | O | A07AA11 |                                   |                                                                                                 |    | 0.6-0.8 g/day |
| Roxithromycin                             | O | J01FA06 | 0.008 (ND)                        |                                                                                                 |    |               |
| Secnidazole                               | O | P01AB07 | 0.03 (ND)                         |                                                                                                 |    |               |
| Sparfloxacin                              | O | J01MA09 | NA                                | NA                                                                                              | NA | NA            |
| Spectinomycin                             | P | J01XX04 | 0.04 (ND)                         |                                                                                                 |    |               |
| Spiramycin                                | O | J01FA02 | 0.09 (0.045-0.09); max 2.8 g/day  |                                                                                                 |    |               |
| Streptomycin                              | P | J01GA01 | 0.02 (0.015-0.02)                 |                                                                                                 |    |               |
| Sultamicillin                             | O | J01CR04 | 0.05 (0.025-0.05); max 0.75 g/day |                                                                                                 |    |               |
| Sulfadimethoxine                          | O | J01ED01 | 0.0125 (0.0125-0.025)             |                                                                                                 |    |               |
| Sulfadimidine                             | O | J01EB03 | 0.15 (0.05-0.15)                  |                                                                                                 |    |               |
| Tedizolid                                 | O | J01XX11 | NA                                | NA                                                                                              | NA | NA            |
| Tedizolid                                 | P | J01XX11 | NA                                | NA                                                                                              | NA | NA            |
| Teicoplanin                               | P | J01XA02 | 0.01 (0.006-0.01)                 |                                                                                                 |    |               |
| Terbinafine                               | O | D01BA02 |                                   |                                                                                                 |    | 0.125 g/day   |
| Tetracycline                              | O | J01AA07 | 0.1 (0.05-0.1)                    |                                                                                                 |    |               |
| Thiamphenicol                             | P | J01BA02 |                                   | <3 years - 0.25 g/day; 3-7 years - 0.5 g/day; 7-12 years - 0.75 g/day                           |    |               |
| Tigecycline                               | P | J01AA12 | 0.0024 (ND)                       |                                                                                                 |    |               |
| Tinidazole                                | O | P01AB02 | 0.075 (0.05-0.075)                |                                                                                                 |    |               |
| Umifenovir                                | O | J05AX13 |                                   | 2-6 years - 0.2 g/day; 6-11 years - 0.4 g/day; 12 years - 0.8 g/day                             |    |               |
| Favipiravir                               | O | J05AX27 | NA                                | NA                                                                                              | NA | NA            |
| Famciclovir                               | O | J05AB09 | NA                                | NA                                                                                              | NA | NA            |
| Fluconazole                               | O | J02AC01 | 0.012 (0.003-0.012)               |                                                                                                 |    |               |
| Fluconazole                               | P | J02AC01 | 0.012 (0.003-0.012)               |                                                                                                 |    |               |
| Fosfomycin                                | O | J01XX01 |                                   |                                                                                                 |    | 2 g/day       |
| Fosfomycin                                | P | J01XX01 | 0.4 (0.2-0.4)                     |                                                                                                 |    |               |

|                                           |   |         |                                                                      |    |    |               |
|-------------------------------------------|---|---------|----------------------------------------------------------------------|----|----|---------------|
| Fusidic acid                              | O | J01XC01 | 3-4 years – 40-60 mg/kg; >4 years – 20-40 mg/kg                      |    |    |               |
| Furazidin                                 | O | J01XE03 | NA                                                                   | NA | NA | NA            |
| Furazolidone                              | O | G01AX06 | 0.01 (0.006-0.01)                                                    |    |    |               |
| Chloramphenicol                           | O | J01BA01 | 0.05 (0.0375-0.05)                                                   |    |    |               |
| Cefazolin                                 | P | J01DB04 | 0.1 (0.025-0.1)                                                      |    |    |               |
| Cefalexin                                 | O | J01DB01 | 0.1 (0.025-0.1)                                                      |    |    |               |
| Cefamandol                                | P | J01DC03 | 0.15 (0.05-0.15)                                                     |    |    |               |
| Cefditoren                                | O | J01DD16 |                                                                      |    |    | 0.4-0.8 g/day |
| cefepime                                  | P | J01DE01 | 0.15 (ND)                                                            |    |    |               |
| Cefixime                                  | O | J01DD08 | 0.008 (ND)                                                           |    |    |               |
| Cefoxitin                                 | P | J01DC01 | 0.16 (0.09-0.16)                                                     |    |    |               |
| Cefoperazone                              | P | J01DD12 | 0.2 (0.05-0.2)                                                       |    |    |               |
| Cefoperazone and beta-lactamase inhibitor | P | J01DD62 | 0.08 (0.02-0.08)                                                     |    |    |               |
| Cefotaxime                                | P | J01DD01 | 0.1 (0.05-0.1)                                                       |    |    |               |
| Cefpir                                    | P | J01DE02 |                                                                      |    |    | 2-4 g/day     |
| Ceftazidime                               | P | J01DD02 | 0.15 (0.1-0.15)                                                      |    |    |               |
| Ceftazidime and beta-lactamase inhibitor  | P | J01DD52 | NA                                                                   | NA | NA | NA            |
| Ceftaroline                               | P | J01DI02 | <1 year - 0.024 mg/kg;<br>≥2 years - 0.036 mg/kg;<br>max - 1.2 g/day |    |    |               |
| Ceftolosan and beta-lactamase inhibitor   | P | J01DI54 | NA                                                                   | NA | NA | NA            |
| Ceftriaxone                               | P | J01DD04 | 0.1 (0.02-0.1)                                                       |    |    |               |
| Cefuroxime                                | P | J01DC02 | 0.1 (0.03-0.1)                                                       |    |    |               |
| Cefuroxime                                | O | J01DC03 | 0.015 (0.01-0.015)                                                   |    |    |               |
| Ciprofloxacin                             | O | J01MA02 | 0.04 (ND)                                                            |    |    |               |
| Ciprofloxacin                             | P | J01MA02 | 0.03 (ND)                                                            |    |    |               |
| Erythromycin                              | O | J01FA01 | NA                                                                   | NA | NA | NA            |
| Erythromycin                              | P | J01FA01 | 0.05 (0.03-0.05)                                                     |    |    |               |
| Ertapenem                                 | P | J01DH03 | 0.03 (ND)                                                            |    |    |               |

NA - not applicable, ND – no data

**Reference:**

1. WHO Collaborating Centre for Drug Statistics Methodology. *Guidelines for ATC classification and DDD assignment 2023*. Oslo, Norway, 2022.
2. World Health Organisation. Child growth standards. Available online: <https://www.who.int/tools/child-growth-standards> (accessed on 01.06.2023)
3. Russian State Register of Medicines. Available online: <https://grls.rosminzdrav.ru/material/national/medicine-registry> (accessed on 01.06.2023)
